# Supplementary material for: Systematic Analysis of Cis-Elements in Unstable mRNAs Demonstrates that CUGBP1 Is a Key Regulator of mRNA Decay in Muscle Cells
Source: PLoS One. 2010 Jun 21;5(6):e11201. doi: 10.1371/journal.pone.0011201 (PMC2888570; doi:10.1371/journal.pone.0011201)
Supplement: Dataset S2 — Signal-to-negative ratio for mRNAs immunoprecipitated with CUGBP1. (1.98 MB XLS) [file pone.0011201.s002.xls]

## Sheet: Sheet1
Table S4. Signal-to-negative ratios for RIP-chip experiment.
Gene_id	Gene_sym	Transcript_id	signal-to-negative	Percentile
21771	Cirh1a	10575102	22.9627	100
98258	Txndc9	10396064	20.705	99.9943
68724	Arl8a	10350113	20.5701	99.9886
20443	St3gal4	10592084	20.329	99.983
109284	C030046I01Rik	10370681	18.7229	99.9773
11984	Atp6v0c	10448455	18.1756	99.9716
54208	Arl6ip1	10567219	17.9652	99.9659
56349	Net1	10407420	16.6809	99.9603
11984	Atp6v0c	10537316	16.0782	99.9546
13358	Slc25a1	10438262	16.0745	99.9489
98258	Txndc9	10354079	15.8664	99.9432
67141	Fbxo5	10361375	15.8071	99.9376
11984	Atp6v0c	10549653	15.4214	99.9319
13663	Ei24	10592237	15.1222	99.9262
12237	Bub3	10558248	14.5492	99.9205
67636	Lyrm5	10542714	14.4046	99.9149
22154	Tubb5	10450605	14.1424	99.9092
15374	Hn1	10392943	13.8893	99.9035
94280	Sfxn3	10463462	13.6827	99.8978
74194	Rnd3	10482500	13.662	99.8921
12767	Cxcr4	10357472	13.4135	99.8865
209448	Hoxc10	10427280	13.4008	99.8808
76551	Ccdc6	10363845	13.1465	99.8751
66940	Shisa5	10589350	12.7709	99.8694
14467	Gbas	10526055	12.7094	99.8638
12111	Bgn	10600169	12.3708	99.8581
15081	H3f3b	10411776	12.3406	99.8524
100044509	LOC100044509	10569927	12.1272	99.8467
70088	2310005N01Rik	10508042	12.0904	99.8411
15081	H3f3b	10540507	11.959	99.8354
246256	Fcgr4	10351509	11.6824	99.8297
66442	Spc25	10483401	11.6188	99.824
68969	Eif1b	10590298	11.4975	99.8183
223922	Atf7	10433032	11.4157	99.8127
674164	LOC674164	10541482	11.3288	99.807
13688	Eif4ebp2	10369474	11.3073	99.8013
213742	Xist	10606178	11.259	99.7956
15081	H3f3b	10412378	11.2369	99.79
223922	Atf7	10433034	11.196	99.7843
15081	H3f3b	10360679	11.0585	99.7786
98711	Rdh10	10344952	10.8855	99.7729
434401	EG434401	10430811	10.7227	99.7673
384009	Glipr2	10504450	10.7162	99.7616
66094	Lsm7	10371002	10.6827	99.7559
56398	1500003O03Rik	10474977	10.6734	99.7502
56457	Clptm1	10560592	10.6409	99.7446
66094	Lsm7	10364373	10.5487	99.7389
211488	Ado	10369779	10.5283	99.7332
105171	Arrdc3	10406407	10.4588	99.7275
71371	Arid5b	10369792	10.3018	99.7218
15368	Hmox1	10572897	10.2554	99.7162
20610	Sumo3	10364287	10.1544	99.7105
16848	Lfng	10527012	10.0576	99.7048
19108	Prkx	10605465	10.0529	99.6991
74648	S100pbp	10516551	10.0185	99.6935
68929	Mospd3	10534854	9.99253	99.6878
68066	Slc25a39	10391669	9.90481	99.6821
66799	Ube2w	10353288	9.88546	99.6764
22785	Slc30a4	10487021	9.87394	99.6708
51792	Ppp2r1a	10442155	9.73805	99.6651
67942	Atp5g2	10433049	9.69206	99.6594
22004	Tpm2	10512499	9.63526	99.6537
434401	EG434401	10444800	9.56251	99.648
192662	Arhgdia	10393836	9.5266	99.6424
56693	Crtap	10597413	9.51933	99.6367
77889	Lbh	10446763	9.49329	99.631
208228	Mobkl2a	10370946	9.46407	99.6253
11555	Adrb2	10459288	9.42853	99.6197
76987	Hdhd2	10456793	9.37992	99.614
100127111	Snord22	10461162	9.31505	99.6083
114143	Atp6v0b	10515519	9.17122	99.6026
674164	LOC674164	10585091	9.16852	99.597
67942	Atp5g2	10447566	9.10628	99.5913
26394	Lypla2	10517425	9.0347	99.5856
100048649	LOC100048649	10470381	9.0267	99.5799
97863	C78339	10404928	9.01465	99.5743
14368	Fzd6	10423825	9.00733	99.5686
12540	Cdc42	10517559	8.96488	99.5629
67942	Atp5g2	10560816	8.95947	99.5572
70310	Plscr3	10377612	8.7935	99.5515
20437	Siah1a	10580452	8.79027	99.5459
16647	Kpna2	10497503	8.76489	99.5402
19056	Ppp3cb	10417895	8.70529	99.5345
16647	Kpna2	10392284	8.70066	99.5288
21749	Terf1	10344939	8.69145	99.5232
16478	Jund	10572456	8.64841	99.5175
217558	6030408C04Rik	10395612	8.64084	99.5118
636070	EG636070	10400189	8.63581	99.5061
74868	Tmem65	10428827	8.62627	99.5005
18023	Nfe2l1	10390271	8.59529	99.4948
93686	Rbm9	10430145	8.50948	99.4891
16647	Kpna2	10453512	8.49748	99.4834
22240	Dpysl3	10458663	8.38464	99.4777
21366	Slc6a6	10540122	8.35232	99.4721
223455	2014-03-07	10428020	8.32112	99.4664
18637	Pfdn2	10351583	8.30328	99.4607
17927	Myod1	10553256	8.29746	99.455
66234	Sc4mol	10578916	8.1915	99.4494
73826	Poldip3	10430945	8.17646	99.4437
212111	Inpp5a	10558515	8.06968	99.438
66508	2400001E08Rik	10460765	8.02941	99.4323
320267	Fubp3	10471171	7.99928	99.4267
17775	Laptm4a	10394477	7.98494	99.421
22088	Tsg101	10563643	7.94681	99.4153
54401	Ywhab	10478424	7.86311	99.4096
68801	Elovl5	10587284	7.85125	99.404
56473	Fads2	10465895	7.849	99.3983
56371	Fzr1	10371159	7.82717	99.3926
68926	Ubap2	10512195	7.73754	99.3869
226178	D19Wsu162e	10463687	7.68974	99.3812
53817	Bat1a	10444761	7.64623	99.3756
26416	Mapk14	10443391	7.64456	99.3699
67393	Cxxc5	10454851	7.61965	99.3642
11777	Ap3s1	10574096	7.52477	99.3585
56351	Ptges3	10511865	7.51769	99.3529
11933	Atp1b3	10595793	7.48546	99.3472
56351	Ptges3	10367100	7.47956	99.3415
110454	Ly6a	10429564	7.47098	99.3358
19345	Rab5c	10391242	7.43064	99.3302
208715	Hmgcs1	10412466	7.41053	99.3245
17928	Myog	10349993	7.40975	99.3188
228005	Ppig	10472570	7.3799	99.3131
54351	Rai12	10387757	7.32668	99.3074
16476	Jun	10514466	7.28547	99.3018
53945	Slc40a1	10354374	7.28273	99.2961
19046	Ppp1cb	10520952	7.22298	99.2904
74747	Ddit4	10369290	7.15503	99.2847
68799	Rgmb	10448081	7.11975	99.2791
97820	4833439L19Rik	10409330	7.10739	99.2734
16835	Ldlr	10583732	7.10257	99.2677
11777	Ap3s1	10604230	6.9643	99.262
68612	Ube2c	10478572	6.95919	99.2564
107732	Mrpl10	10380732	6.95445	99.2507
66522	Pgpep1	10579335	6.93972	99.245
70296	Tbc1d13	10470936	6.9348	99.2393
56397	Morf4l2	10606876	6.93174	99.2337
11777	Ap3s1	10455542	6.89634	99.228
71446	Wrb	10437174	6.86445	99.2223
107566	Arl2bp	10574204	6.82807	99.2166
71833	Wdr68	10382010	6.82629	99.2109
22196	Ube2i	10478012	6.81866	99.2053
230125	Mcart1	10512709	6.79745	99.1996
106248	Qtrtd1	10439532	6.76678	99.1939
239096	Cdh24	10419814	6.7419	99.1882
67515	Ttc33	10422718	6.74121	99.1826
20971	Sdc4	10489484	6.72068	99.1769
12443	Ccnd1	10569646	6.6209	99.1712
16319	Incenp	10465861	6.61315	99.1655
107513	Ssr1	10408709	6.55542	99.1599
11798	Xiap	10599369	6.55041	99.1542
83383	Tcfap4	10437384	6.5318	99.1485
56351	Ptges3	10539649	6.49454	99.1428
101142	Itfg2	10548180	6.49329	99.1371
665860	EG665860	10510462	6.48536	99.1315
71918	Zcchc24	10418171	6.47545	99.1258
14674	Gna13	10382243	6.46882	99.1201
22088	Tsg101	10424411	6.44171	99.1144
66290	Atp6v1g1	10505461	6.43704	99.1088
22196	Ube2i	10598636	6.43389	99.1031
20393	Sgk1	10362073	6.43182	99.0974
70546	Zdhhc2	10571399	6.38197	99.0917
214459	Fnbp1l	10501860	6.37911	99.0861
50918	Myadm	10569707	6.37181	99.0804
68564	Nufip2	10378902	6.3266	99.0747
104625	Cnot6	10385557	6.30501	99.069
665860	EG665860	10531284	6.28946	99.0634
101185	Pot1a	10543471	6.28059	99.0577
12571	Cdk6	10519324	6.26427	99.052
50784	Ppap2c	10370552	6.25902	99.0463
20652	Soat1	10359161	6.25719	99.0406
66632	Atpbd4	10486029	6.25109	99.035
16323	Inhba	10403743	6.24085	99.0293
78541	Asb8	10432122	6.2288	99.0236
16533	Kcnmb1	10375137	6.22424	99.0179
216344	Rab21	10372478	6.21081	99.0123
17131	Smad7	10456745	6.1898	99.0066
192196	Luc7l2	10537397	6.17347	99.0009
101358	Fbxl14	10541182	6.16769	98.9952
382423	ENSMUSG00000074747	10372417	6.15752	98.9896
14062	F2r	10411229	6.1374	98.9839
19326	Rab11b	10465683	6.06265	98.9782
81489	Dnajb1	10573198	6.04724	98.9725
23992	Prkra	10483856	6.00377	98.9668
73469	Rnf38	10512655	6.00184	98.9612
76969	Chst1	10474045	5.97736	98.9555
66290	Atp6v1g1	10482330	5.95489	98.9498
12934	Dpysl2	10420988	5.93704	98.9441
29812	Ndrg3	10489065	5.9356	98.9385
67554	Slc25a30	10421648	5.92345	98.9328
12527	Cd9	10548030	5.92304	98.9271
21750	Terf2	10581523	5.90151	98.9214
72999	Insig2	10357280	5.89635	98.9158
218793	Ube2e2	10417759	5.87115	98.9101
18787	Serpine1	10534667	5.83888	98.9044
226151	6030443O07Rik	10463410	5.81894	98.8987
224938	Pja2	10447490	5.79368	98.8931
26905	Eif2s3x	10605740	5.76057	98.8874
100040099	ENSMUSG00000074908	10409204	5.75756	98.8817
16828	Ldha	10553301	5.75748	98.876
104318	Csnk1d	10394040	5.73872	98.8703
21416	Tcf7l2	10464084	5.7308	98.8647
114128	Laptm4b	10423593	5.72241	98.859
170742	Sertad3	10551355	5.70764	98.8533
218975	Mapk1ip1l	10414355	5.70449	98.8476
20682	Sox9	10382328	5.68116	98.842
12534	Cdc2a	10369815	5.64946	98.8363
67125	Tspan31	10373027	5.61751	98.8306
192657	Ell2	10406254	5.61546	98.8249
69065	Chac1	10474972	5.60777	98.8193
241296	Lrrc8a	10470954	5.58871	98.8136
54198	Snx3	10362823	5.56733	98.8079
19179	Psmc1	10439878	5.55768	98.8022
13990	Smarcad1	10538755	5.54857	98.7965
20877	Aurkb	10377405	5.5395	98.7909
76178	6330578E17Rik	10353993	5.5395	98.7909
67171	Tmem77	10495163	5.53925	98.7795
59090	Midn	10364702	5.53216	98.7738
80904	Dtx3	10373093	5.51054	98.7682
14026	Evl	10398267	5.50572	98.7625
12340	Capza1	10349014	5.47221	98.7568
11909	Atf2	10483737	5.45189	98.7511
74137	Nuak2	10349782	5.44754	98.7455
69288	Rhobtb1	10363773	5.42581	98.7398
11512	Adcy6	10432190	5.41305	98.7341
18453	P4hb	10393823	5.40692	98.7284
100043982	LOC100043982	10391990	5.39603	98.7228
12340	Capza1	10500928	5.37167	98.7171
73137	Prrc1	10455852	5.36515	98.7114
63959	Slc29a1	10451123	5.35802	98.7057
66578	2610039C10Rik	10440794	5.32397	98.7
66511	2500003M10Rik	10499847	5.31854	98.6944
68581	Tmed10	10408684	5.31419	98.6887
224647	D17Wsu92e	10449386	5.29588	98.683
19231	Ptma	10495873	5.25833	98.6773
209497	Tmem164	10602180	5.25061	98.6717
56737	Alg2	10512847	5.24606	98.666
66618	2610209M04Rik	10545932	5.24271	98.6603
18648	Pgam1	10463168	5.23199	98.6546
18648	Pgam1	10561302	5.23199	98.6546
66390	Slmo2	10490225	5.21914	98.6433
640370	EG640370	10541089	5.21624	98.6376
100044416	LOC100044416	10477004	5.21544	98.6319
13972	Gnb1l	10434224	5.19722	98.6262
83797	Smarcd1	10426798	5.18472	98.6206
235072	2014-09-08	10583905	5.18277	98.6149
640370	EG640370	10489043	5.17788	98.6092
14904	Gtpbp1	10425302	5.1762	98.6035
22390	Wee1	10556266	5.16364	98.5979
108705	Pttg1ip	10364280	5.16341	98.5922
27801	Zdhhc8	10438293	5.13579	98.5865
52398	2014-09-12	10523281	5.12987	98.5808
240334	Pcyox1l	10459229	5.1206	98.5752
13728	Mark2	10465649	5.11629	98.5695
16784	Lamp2	10604187	5.10791	98.5638
26572	Cops3	10386442	5.09465	98.5581
12575	Cdkn1a	10443463	5.07042	98.5525
83486	Rbm5	10596769	5.0617	98.5468
68581	Tmed10	10401661	5.05951	98.5411
63953	Dusp10	10352448	5.05785	98.5354
105440	Kctd9	10416155	5.04573	98.5297
14567	Gdi1	10600390	5.02914	98.5241
68970	Wdr40a	10512226	5.02476	98.5184
381038	Parl	10468990	5.01262	98.5127
268490	Lsm12	10391572	4.98886	98.507
70527	Stambp	10545720	4.98856	98.5014
23790	Coro1c	10532753	4.97426	98.4957
19231	Ptma	10417601	4.9669	98.49
18648	Pgam1	10497321	4.96052	98.4843
70551	Tmtc4	10422518	4.9601	98.4787
19231	Ptma	10348078	4.95511	98.473
77644	C330007P06Rik	10455372	4.95307	98.4673
66140	1110001A07Rik	10379989	4.94853	98.4616
67468	Mmd	10380289	4.9408	98.4559
52696	Zwint	10363905	4.94003	98.4503
675534	LOC675534	10480087	4.93682	98.4446
64453	Zfp280b	10364130	4.92858	98.4389
211347	Pank3	10375216	4.92179	98.4332
380959	Alg10b	10426292	4.9133	98.4276
109006	Ciapin1	10580771	4.9018	98.4219
68911	Pygo2	10493530	4.88903	98.4162
228836	Dlgap4	10477897	4.87734	98.4105
15395	Hoxa10	10544798	4.87597	98.4049
56376	Pdlim5	10502469	4.8521	98.3992
19330	Rab18	10453705	4.84396	98.3935
52635	D12Ertd551e	10399061	4.83262	98.3878
22325	Vav2	10481210	4.83068	98.3822
72486	Rnf219	10422185	4.82478	98.3765
12444	Ccnd2	10548105	4.81578	98.3708
15200	Hbegf	10458340	4.80263	98.3651
56443	Arpc1a	10527430	4.78655	98.3594
56501	ENSMUSG00000053512	10604393	4.78597	98.3538
75869	Arl5b	10469425	4.78217	98.3481
11480	Acvr2a	10471953	4.7742	98.3424
56878	Rbms1	10483023	4.76998	98.3367
99151	Cercam	10470775	4.76073	98.3311
98415	Nucks1	10349733	4.75619	98.3254
20249	Scd1	10467979	4.73569	98.3197
19230	Twf1	10555892	4.71488	98.314
76303	Osbp	10461690	4.71189	98.3084
103743	Tmem98	10379489	4.70712	98.3027
240028	Lnpep	10448094	4.70496	98.297
68713	Ifitm1	10558769	4.70332	98.2913
12531	Cdc25b	10476252	4.70238	98.2856
18227	Nr4a2	10482772	4.70218	98.28
12417	Cbx3	10346549	4.69877	98.2743
69085	Zcchc9	10410975	4.6953	98.2686
108954	Ppp1r15b	10349868	4.68705	98.2629
66059	Krtcap2	10493484	4.68367	98.2573
94275	Maged1	10605766	4.66966	98.2516
24075	Taf10	10365288	4.66919	98.2459
116940	Tgs1	10503085	4.65731	98.2402
19084	Prkar1a	10382284	4.65441	98.2346
19192	Psme3	10381345	4.64713	98.2289
14007	Cugbp2	10479950	4.64531	98.2232
18035	Nfkbia	10400405	4.64339	98.2175
70319	2600006K01Rik	10481380	4.63119	98.2119
20315	Cxcl12	10541075	4.6236	98.2062
107368	Pdzd8	10468789	4.62326	98.2005
19324	Rab1	10374466	4.61009	98.1948
675440	OTTMUSG00000012141	10392947	4.60835	98.1891
59043	Wsb2	10386934	4.60829	98.1835
226251	Ablim1	10468691	4.6056	98.1778
675440	OTTMUSG00000012141	10438454	4.5959	98.1721
18605	Enpp1	10368289	4.58676	98.1664
15939	Ier5	10358978	4.57474	98.1608
77853	Msl2l1	10588192	4.57404	98.1551
81535	Sgpp1	10401028	4.57082	98.1494
19230	Twf1	10431802	4.54292	98.1437
18708	Pik3r1	10411782	4.54114	98.1381
19156	Psap	10363430	4.52833	98.1324
16911	Lmo4	10502510	4.52656	98.1267
17134	Mafg	10393879	4.5189	98.121
11842	Arf3	10432256	4.51414	98.1153
56233	Hdac7	10432006	4.50851	98.1097
78521	B230219D22Rik	10405535	4.50839	98.104
19179	Psmc1	10397741	4.50685	98.0983
675440	OTTMUSG00000012141	10353219	4.50596	98.0926
665155	Srp54b	10395739	4.49953	98.087
19206	Ptch1	10410039	4.49837	98.0813
26442	Psma5	10365426	4.49255	98.0756
13874	Ereg	10523175	4.4788	98.0699
140499	Ube2j2	10420237	4.46978	98.0643
57339	Jph1	10353309	4.46616	98.0586
19139	Prps1	10602062	4.45618	98.0529
67145	Tomm34	10489413	4.4544	98.0472
11911	Atf4	10425364	4.4536	98.0416
22215	Ube3a	10553813	4.4518	98.0359
18475	Pafah1b2	10593159	4.4469	98.0302
20333	Sec22b	10494583	4.4463	98.0245
21973	Top2a	10390707	4.4443	98.0188
218581	Depdc1b	10407081	4.44388	98.0132
18174	Slc11a2	10432573	4.43799	98.0075
66206	1110059E24Rik	10466676	4.43646	98.0018
20474	Six4	10400971	4.43184	97.9961
66508	2400001E08Rik	10555586	4.42378	97.9905
229782	Slc35a3	10501690	4.41515	97.9848
12399	Runx3	10509030	4.4023	97.9791
67213	Cmtm6	10589929	4.39402	97.9734
30939	Pttg1	10385325	4.38761	97.9678
17387	Mmp14	10415052	4.38267	97.9621
71805	Nup93	10574033	4.37714	97.9564
15568	Elavl1	10576873	4.3687	97.9507
11908	Atf1	10426875	4.36316	97.945
12848	Cops2	10487175	4.36306	97.9394
236848	BC023829	10604922	4.3588	97.9337
12417	Cbx3	10421573	4.35324	97.928
19646	Rbbp4	10516576	4.3415	97.9223
12417	Cbx3	10538282	4.3396	97.9167
22318	Vamp2	10377431	4.33648	97.911
101867	1500003O22Rik	10566516	4.33593	97.9053
268448	Phf12	10378988	4.3322	97.8996
56399	Akap8	10449839	4.33047	97.894
319622	Itpripl2	10567299	4.32909	97.8883
100201	Tmem64	10503410	4.32383	97.8826
319622	Itpripl2	10567297	4.32033	97.8769
214137	Arhgap29	10495685	4.3183	97.8713
665283	OTTMUSG00000005112	10374181	4.31747	97.8656
13046	Cugbp1	10473779	4.3131	97.8599
215449	Rap1b	10372716	4.30934	97.8542
22151	Tubb2a	10408610	4.29485	97.8485
14595	B4galt1	10512129	4.29427	97.8429
100226	Stx12	10516982	4.29366	97.8372
545085	Wdr70	10581575	4.28642	97.8315
218460	Wdr41	10406718	4.28406	97.8258
68837	Foxk2	10383545	4.28042	97.8202
194655	Klf11	10394971	4.27902	97.8145
68842	Tulp4	10441497	4.27866	97.8088
638636	638636	10349832	4.27472	97.8031
107767	Scamp1	10411156	4.26585	97.7975
21423	Tcfe2a	10370837	4.26523	97.7918
20148	Dhrs3	10510129	4.26308	97.7861
230257	Rod1	10513381	4.26086	97.7804
327826	Frs2	10372618	4.25778	97.7748
667723	EG667723	10467489	4.24671	97.7691
675440	OTTMUSG00000012141	10484351	4.24202	97.7634
12631	Cfl1	10460616	4.22891	97.7577
233724	Tmem41b	10587746	4.22659	97.752
11652	Akt2	10374364	4.22628	97.7464
58523	Elp2	10454332	4.2079	97.7407
225339	Ammecr1l	10454469	4.19173	97.735
19291	Purb	10384150	4.19005	97.7293
23849	Klf6	10403352	4.17769	97.7237
67219	Med18	10516926	4.17736	97.718
71779	2014-03-09	10541049	4.17449	97.7123
16430	Stt3a	10592217	4.17427	97.7066
19141	Lgmn	10402268	4.17217	97.701
13557	E2f3	10408475	4.16321	97.6953
17684	Cited2	10361828	4.1599	97.6896
12449	Ccnf	10448506	4.15855	97.6839
12972	Cryz	10497001	4.15573	97.6782
17261	Mef2d	10493177	4.14954	97.6726
56494	Gosr2	10391949	4.14781	97.6669
16392	Isl1	10412335	4.14401	97.6612
54138	Atxn10	10425966	4.14291	97.6555
75734	Mff	10347862	4.14264	97.6499
67464	Entpd4	10416199	4.14016	97.6442
66700	Vps24	10539008	4.13998	97.6385
327900	Ubtd2	10375079	4.1321	97.6328
12520	Cd81	10559261	4.13043	97.6272
68441	Rraga	10505747	4.12637	97.6215
74102	Slc35a5	10439642	4.12224	97.6158
15251	Hif1a	10396421	4.11681	97.6101
223870	Senp1	10432101	4.11539	97.6045
233575	Frag1	10555671	4.1083	97.5988
14451	Gas1	10409833	4.10716	97.5931
11652	Akt2	10551393	4.10262	97.5874
74383	Ubap2l	10499716	4.10236	97.5817
19252	Dusp1	10449284	4.09889	97.5761
76789	2410129H14Rik	10421975	4.09536	97.5704
22234	Ugcg	10505187	4.09337	97.5647
225995	D030056L22Rik	10461930	4.09283	97.559
76789	2410129H14Rik	10457331	4.0922	97.5534
21825	Thbs1	10474700	4.09157	97.5477
667723	EG667723	10469575	4.09066	97.542
56356	Gltp	10532857	4.08989	97.5363
21859	Timp3	10365482	4.0894	97.5307
675440	OTTMUSG00000012141	10520124	4.08838	97.525
140499	Ube2j2	10511252	4.08806	97.5193
28042	D5Wsu178e	10520483	4.06967	97.5136
16011	Igfbp5	10355500	4.06234	97.5079
12330	Canx	10385599	4.04232	97.5023
76775	Slc10a7	10572989	4.03999	97.4966
75841	Rnf139	10424335	4.02573	97.4909
13002	Dnajc5	10479639	4.02502	97.4852
67501	Ccdc50	10434869	4.02321	97.4796
12469	Cct8	10440600	4.02084	97.4739
11966	Atp6v1b2	10572146	4.01974	97.4682
75219	Dusp18	10373810	4.01897	97.4625
12633	Cflar	10346562	4.01767	97.4569
107971	Frs3	10445710	4.01279	97.4512
56442	Serinc1	10369210	4.00928	97.4455
269987	2610024B07Rik	10556456	4.00876	97.4398
19042	Ppm1a	10396358	3.97935	97.4342
22146	Tuba1c	10592058	3.9734	97.4285
83673	Snhg1	10461148	3.97062	97.4228
223989	4921513D23Rik	10437852	3.96471	97.4171
667723	EG667723	10548563	3.96404	97.4114
13046	Cugbp1	10473760	3.96365	97.4058
54633	Pqbp1	10603373	3.95162	97.4001
29864	Rnf11	10515072	3.95158	97.3944
19664	Rbpj	10521913	3.94659	97.3887
72183	Snx6	10400336	3.94446	97.3831
667723	EG667723	10353707	3.93995	97.3774
19684	Rdx	10585301	3.92812	97.3717
98267	Stk17b	10354588	3.92722	97.366
19826	Rnps1	10543080	3.92671	97.3604
14252	Flot2	10379013	3.92505	97.3547
22344	Vezf1	10380219	3.92421	97.349
74287	Kcmf1	10545471	3.92208	97.3433
11787	Apbb2	10530287	3.91638	97.3376
72124	Seh1l	10456423	3.89234	97.332
381038	Parl	10438460	3.87941	97.3263
65960	Twsg1	10452508	3.87435	97.3206
74012	Rap2b	10492335	3.8741	97.3149
67443	Map1lc3b	10576056	3.86914	97.3093
228136	Zdhhc5	10484440	3.86833	97.3036
71801	Plekhf2	10511498	3.86049	97.2979
19826	Rnps1	10442435	3.85473	97.2922
108645	Mat2b	10385239	3.84936	97.2866
13713	Elk3	10371959	3.83917	97.2809
15481	Hspa8	10584578	3.83629	97.2752
15481	Hspa8	10584576	3.83629	97.2752
22631	Ywhaz	10493891	3.83601	97.2639
22146	Tuba1c	10426650	3.83514	97.2582
19872	Rny1	10544523	3.83349	97.2525
233812	BC030336	10556957	3.82235	97.2468
80795	Selk	10405729	3.81732	97.2411
100044642	LOC100044642	10463068	3.81691	97.2355
22196	Ube2i	10448912	3.81675	97.2298
110911	Cds2	10476326	3.81469	97.2241
15312	Hmgn1	10441161	3.81069	97.2184
100038401	ENSMUSG00000072684	10413220	3.8083	97.2128
13685	Eif4ebp1	10571162	3.80683	97.2071
68097	Dynll2	10389674	3.80626	97.2014
13684	Eif4e	10599855	3.80598	97.1957
226151	6030443O07Rik	10463404	3.79822	97.1901
108907	Nusap1	10474984	3.7916	97.1844
71949	Lass5	10432527	3.78989	97.1787
65103	Arl6ip6	10472128	3.7876	97.173
237459	Pctk2	10365729	3.77644	97.1673
72972	Gcap14	10418991	3.77623	97.1617
224105	Pak2	10439032	3.7756	97.156
229517	Slc25a44	10499372	3.77307	97.1503
56878	Rbms1	10483025	3.77188	97.1446
56332	Amotl2	10588226	3.76501	97.139
50926	Hnrpdl	10531645	3.76419	97.1333
16589	Uhmk1	10359961	3.76189	97.1276
13803	Enc1	10406817	3.76179	97.1219
13798	En1	10349345	3.75711	97.1163
26442	Psma5	10495279	3.75652	97.1106
19087	Prkar2a	10589087	3.75605	97.1049
73067	Tmem192	10572038	3.7542	97.0992
71900	Tmem106b	10536429	3.75287	97.0936
68108	9430008C03Rik	10489239	3.75051	97.0879
56334	Tmed2	10584162	3.74961	97.0822
224903	Safb	10446109	3.74701	97.0765
26360	Angptl2	10471555	3.74225	97.0708
13135	Dad1	10419736	3.73562	97.0652
19777	C80913	10562548	3.73428	97.0595
21372	Tbl1x	10600547	3.73232	97.0538
433762	LOC433762	10508800	3.73134	97.0481
433762	LOC433762	10573865	3.73134	97.0481
20788	Srebf2	10425695	3.72826	97.0368
78755	4632404H22Rik	10604620	3.72759	97.0311
15234	Hgf	10519857	3.72673	97.0254
677333	677333	10450744	3.72355	97.0198
110213	Tegt	10426751	3.72263	97.0141
17188	Maz	10568139	3.72172	97.0084
72946	Lrrc47	10510836	3.71963	97.0027
12151	Bmi1	10469514	3.71451	96.997
12306	Anxa2	10586744	3.71417	96.9914
108911	Rcc2	10509820	3.71195	96.9857
67898	Pef1	10508608	3.7079	96.98
67760	Slc38a2	10431894	3.70691	96.9743
229542	Gatad2b	10493758	3.70525	96.9687
109270	Prr5	10425880	3.70084	96.963
17449	Mdh1	10384603	3.6993	96.9573
277463	Gpr107	10471108	3.69733	96.9516
224170	Dzip3	10439798	3.69438	96.946
28193	Reep3	10369761	3.69138	96.9403
545216	EG545216	10446334	3.68823	96.9346
321022	Cdv3	10419136	3.68658	96.9289
68916	Cdkal1	10408455	3.68387	96.9233
20878	Aurka	10490104	3.68197	96.9176
56334	Tmed2	10525744	3.68165	96.9119
72562	Pcbd2	10405545	3.68107	96.9062
67490	1810074P20Rik	10511843	3.67342	96.9005
100048094	LOC100048094	10404262	3.6691	96.8949
14825	Cxcl1	10523151	3.66237	96.8892
12417	Cbx3	10405868	3.65926	96.8835
209032	Zc3hav1l	10544084	3.65714	96.8778
22388	Wdr1	10529689	3.6553	96.8722
20729	Spin1	10405163	3.64692	96.8665
210992	Lpcat1	10406031	3.63922	96.8608
100048094	LOC100048094	10369206	3.63614	96.8551
68337	Crip2	10398996	3.63316	96.8495
236794	Slc9a6	10599719	3.63136	96.8438
18148	Npm1	10385043	3.6276	96.8381
215193	AA408296	10361200	3.62215	96.8324
68365	Rab14	10482017	3.62129	96.8267
11520	Adfp	10514221	3.61871	96.8211
217653	C79407	10400589	3.6068	96.8154
110172	Slc35b1	10380524	3.60543	96.8097
67510	1810036I24Rik	10376929	3.60291	96.804
19027	Sypl	10395277	3.60199	96.7984
19384	Ran	10525983	3.59719	96.7927
20583	Snai2	10433776	3.59661	96.787
320213	Senp5	10439021	3.59627	96.7813
19353	Rac1	10535471	3.59216	96.7757
66661	Srp72	10522676	3.58617	96.77
241576	Ldlrad3	10485388	3.5755	96.7643
67229	Prpf18	10479794	3.57394	96.7586
70620	Ube2v2	10437942	3.57388	96.753
22319	Vamp3	10518805	3.57118	96.7473
72018	Fundc1	10603785	3.57029	96.7416
109154	2410014A08Rik	10532954	3.56828	96.7359
68151	Gpr177	10497149	3.56727	96.7302
67698	Fam174a	10348917	3.56509	96.7246
22099	Tsn	10357124	3.55807	96.7189
210998	D15Ertd621e	10424260	3.55675	96.7132
20750	Spp1	10523717	3.55619	96.7075
74026	4121402D02Rik	10381018	3.55511	96.7019
665155	Srp54b	10395788	3.55066	96.6962
22146	Tuba1c	10432398	3.54979	96.6905
69082	Zc3h15	10473272	3.54938	96.6848
381820	2700089E24Rik	10542264	3.54341	96.6792
20383	Sfrs3	10501661	3.5418	96.6735
12336	Capns1	10561842	3.54	96.6678
66492	Zmat2	10455007	3.53708	96.6621
22381	Wbp5	10601854	3.53355	96.6564
67771	Arpc5	10350684	3.52992	96.6508
14958	H1f0	10425207	3.52385	96.6451
67958	2610101N10Rik	10595723	3.51373	96.6394
12417	Cbx3	10410207	3.51282	96.6337
12417	Cbx3	10405874	3.51282	96.6337
75553	Zc3h14	10397666	3.51052	96.6224
100048094	LOC100048094	10490256	3.50967	96.6167
22146	Tuba1c	10587780	3.5088	96.611
71804	2610016C23Rik	10361995	3.50812	96.6054
100042180	LOC100042180	10560103	3.50636	96.5997
234663	Dync1li2	10581073	3.50588	96.594
208292	9030612M13Rik	10449914	3.5055	96.5883
19821	Rnf2	10358698	3.50476	96.5827
229279	Hnrnpa3	10503370	3.49381	96.577
18003	Nedd9	10408850	3.49229	96.5713
68024	Hist1h2bc	10404053	3.49155	96.5656
21413	Tcf4	10456522	3.48693	96.5599
56294	Ptpn9	10585610	3.48048	96.5543
100048094	LOC100048094	10479174	3.48035	96.5486
100042180	LOC100042180	10479187	3.48035	96.5486
22668	Sf1	10460926	3.47908	96.5372
18578	Pde4b	10506335	3.47856	96.5316
791412	OTTMUSG00000000623	10479215	3.47634	96.5259
68473	Mobkl1a	10523001	3.47452	96.5202
68904	Abhd13	10570013	3.46891	96.5145
56217	Mpp5	10396778	3.46753	96.5089
72033	Tsc22d2	10492195	3.46384	96.5032
67704	1810037I17Rik	10604019	3.46319	96.4975
213491	D4Ertd22e	10517892	3.46014	96.4918
116891	Derl2	10388033	3.4595	96.4861
114716	Spred2	10374464	3.45829	96.4805
268697	Ccnb1	10515836	3.45617	96.4748
76179	Usp31	10567589	3.4557	96.4691
207521	Dtx4	10466304	3.45421	96.4634
97998	Depdc6	10424126	3.45046	96.4578
668347	EG668347	10362593	3.44623	96.4521
65112	Pmepa1	10490159	3.43745	96.4464
432537	OTTMUSG00000005178	10374348	3.43043	96.4407
12371	Casp9	10510034	3.4293	96.4351
19352	Rabggtb	10502934	3.42876	96.4294
218203	Mylip	10404874	3.42785	96.4237
18515	Pbx2	10444394	3.42578	96.418
329154	Ankrd44	10354677	3.42446	96.4124
13445	Cdk2ap1	10385495	3.424	96.4067
56772	Mllt11	10500114	3.42263	96.401
15257	Hipk1	10500813	3.42149	96.3953
21415	Tcf3	10545458	3.42063	96.3896
22221	Ubp1	10589848	3.41854	96.384
56334	Tmed2	10425114	3.41634	96.3783
20397	Sgpl1	10369413	3.41385	96.3726
109154	2410014A08Rik	10532944	3.41385	96.3669
20454	St3gal5	10539080	3.41356	96.3613
13831	Epc1	10457302	3.41207	96.3556
226026	Smc5	10466682	3.40952	96.3499
268697	Ccnb1	10411739	3.40807	96.3442
226154	Lzts2	10463457	3.40455	96.3386
229279	Hnrnpa3	10600593	3.39846	96.3329
16653	Kras	10549256	3.39762	96.3272
268697	Ccnb1	10562637	3.39636	96.3215
238330	6430527G18Rik	10401698	3.39562	96.3158
11732	Ank	10423363	3.39346	96.3102
68713	Ifitm1	10570434	3.39332	96.3045
14234	Foxc2	10576051	3.39272	96.2988
103573	Xpo1	10374590	3.3909	96.2931
546080	EG546080	10580231	3.38921	96.2875
72416	Lrpprc	10453334	3.38856	96.2818
433261	EG433261	10464445	3.38804	96.2761
18858	Pmp22	10376950	3.38521	96.2704
70420	2610034B18Rik	10564849	3.38262	96.2648
100043485	100043485	10445941	3.38235	96.2591
100043314	Vstm3	10439527	3.3802	96.2534
241311	Zbtb34	10481827	3.3801	96.2477
68051	Nutf2	10453214	3.3766	96.2421
65247	Asb1	10348618	3.37576	96.2364
27054	Sec23b	10476702	3.37572	96.2307
72265	Tram1	10353167	3.37521	96.225
12417	Cbx3	10405888	3.37469	96.2193
70155	Ogfrl1	10353524	3.3731	96.2137
217337	Srp68	10393222	3.37264	96.208
22152	Tubb3	10576332	3.37238	96.2023
71448	Tmem80	10558872	3.37173	96.1966
27984	Efhd2	10518069	3.3712	96.191
319448	Fndc3a	10421488	3.36617	96.1853
66307	Isoc1	10455912	3.36471	96.1796
69568	Vkorc1l1	10526106	3.3633	96.1739
72542	Pgam5	10532332	3.36327	96.1683
20383	Sfrs3	10424379	3.3612	96.1626
107358	Tm9sf3	10467560	3.35823	96.1569
50721	Sirt6	10371256	3.35778	96.1512
83602	Gtf2a1	10401882	3.35763	96.1455
93730	Lztfl1	10597973	3.35512	96.1399
15405	Hoxa9	10544788	3.35476	96.1342
18391	Oprs1	10512308	3.35042	96.1285
14700	Gng10	10505182	3.34983	96.1228
271981	A630047E20Rik	10496130	3.34899	96.1172
321022	Cdv3	10518344	3.34412	96.1115
448987	Fbxl7	10427898	3.33624	96.1058
12317	Calr	10580219	3.33151	96.1001
72949	Ccnt2	10349442	3.32648	96.0945
14688	Gnb1	10511069	3.32459	96.0888
56386	B4galt6	10457733	3.32435	96.0831
101476	Plekha1	10558134	3.32425	96.0774
214597	Sidt2	10593130	3.3217	96.0718
73158	Larp1	10376312	3.31982	96.0661
59043	Wsb2	10524882	3.31671	96.0604
68137	Kdelr1	10553131	3.31202	96.0547
13589	Mapre1	10477353	3.30896	96.049
13390	Dlx1	10472809	3.30728	96.0434
13445	Cdk2ap1	10533807	3.30618	96.0377
665250	OTTMUSG00000000777	10374117	3.30328	96.032
76073	Pcgf5	10462683	3.30161	96.0263
229279	Hnrnpa3	10515113	3.29549	96.0207
229279	Hnrnpa3	10344741	3.29549	96.0207
52626	Cdkn2aipnl	10375903	3.29039	96.0093
59125	Nek7	10358259	3.28987	96.0036
14470	Rabac1	10560911	3.28974	95.998
57810	Cdon	10584208	3.28767	95.9923
56496	Tspan6	10606609	3.285	95.9866
546032	EG546032	10570002	3.28084	95.9809
18701	Pigf	10453429	3.27339	95.9752
11793	Atg5	10362922	3.26752	95.9696
22763	Zfr	10423134	3.26685	95.9639
66143	Eef1e1	10408762	3.26516	95.9582
18647	Pftk1	10527940	3.26424	95.9525
20910	Stxbp1	10481711	3.26383	95.9469
69912	Nup43	10361651	3.26144	95.9412
218121	Mboat1	10404359	3.26101	95.9355
320063	B230354K17Rik	10445373	3.25912	95.9298
66078	Tsen34	10549582	3.25581	95.9242
53331	Stx7	10362171	3.2546	95.9185
20539	Slc7a5	10582275	3.25343	95.9128
80912	Pum1	10508619	3.25317	95.9071
14824	Grn	10381588	3.25149	95.9015
791412	OTTMUSG00000000623	10515416	3.24999	95.8958
434356	EG434356	10564809	3.24689	95.8901
17758	Mtap4	10589438	3.24666	95.8844
15980	Ifngr2	10436865	3.24644	95.8787
14605	Tsc22d3	10606989	3.24625	95.8731
229279	Hnrnpa3	10492045	3.24541	95.8674
27494	Amot	10607189	3.24428	95.8617
66074	Tmem167	10406530	3.24342	95.856
19652	Rbm3	10556113	3.24338	95.8504
321022	Cdv3	10510219	3.24278	95.8447
15387	Hnrnpk	10409689	3.24276	95.839
625801	EG625801	10580516	3.24254	95.8333
68051	Nutf2	10468531	3.24132	95.8277
68051	Nutf2	10457463	3.24132	95.8277
69554	Klhdc2	10396094	3.23891	95.8163
66817	Tmem170	10581910	3.23891	95.8106
170791	Rbm39	10489018	3.23778	95.805
20362	2014-09-09	10376021	3.2338	95.7993
226551	AI848100	10359446	3.23344	95.7936
67966	Zcchc10	10375975	3.23235	95.7879
67048	2610030H06Rik	10606056	3.23178	95.7822
67048	2610030H06Rik	10512939	3.23178	95.7822
56612	Pfdn5	10427199	3.22791	95.7709
56314	Zfp113	10534966	3.22719	95.7652
13498	Atn1	10547795	3.22598	95.7595
20384	Sfrs5	10396926	3.22194	95.7539
69860	Eif1ad	10460573	3.22169	95.7482
14284	Fosl2	10520862	3.22151	95.7425
26939	Polr3e	10557058	3.22026	95.7368
13207	Ddx5	10392251	3.21991	95.7312
668063	EG668063	10548699	3.2196	95.7255
270066	Slc35e1	10579724	3.21537	95.7198
67006	Cisd2	10502329	3.21535	95.7141
20623	Snrk	10590445	3.21518	95.7084
232313	Glt8d4	10540275	3.2142	95.7028
56418	Ykt6	10374106	3.21353	95.6971
622469	OTTMUSG00000009528	10508490	3.20824	95.6914
20168	Rtn3	10465686	3.20692	95.6857
100048094	LOC100048094	10565582	3.2069	95.6801
64164	Ifrg15	10350792	3.20369	95.6744
12048	Bcl2l1	10488655	3.20303	95.6687
57436	Gabarapl1	10542200	3.19986	95.663
67248	Rpl39	10604072	3.19849	95.6574
17309	Mgat3	10425354	3.1981	95.6517
67963	Npc2	10401519	3.19795	95.646
66439	2010012O05Rik	10463695	3.19632	95.6403
13852	Stx2	10534041	3.19362	95.6347
67710	Polr2g	10465804	3.19305	95.629
329506	Ctdspl2	10475394	3.19225	95.6233
13929	Amz2	10382257	3.18944	95.6176
14230	Fkbp10	10381122	3.18761	95.6119
68041	Mid1ip1	10598638	3.18425	95.6063
18005	Nek2	10352767	3.18387	95.6006
17691	Snf1lk	10449741	3.18148	95.5949
101148	B630005N14Rik	10543213	3.18007	95.5892
108946	Zzz3	10496946	3.17742	95.5836
67039	Rbm25	10397085	3.17339	95.5779
100042107	100042107	10595046	3.17257	95.5722
72462	Rrp1b	10443836	3.1703	95.5665
14955	H19	10569341	3.17014	95.5609
15382	Hnrnpa1	10427885	3.16492	95.5552
622845	EG622845	10466274	3.16345	95.5495
100042289	100042289	10572722	3.16249	95.5438
268396	Sh3pxd2b	10375065	3.16199	95.5381
54196	Pabpn1	10415119	3.15966	95.5325
100434	Slc44a1	10505028	3.15755	95.5268
66624	Spcs2	10565846	3.15307	95.5211
13196	Ddef1	10428998	3.15285	95.5154
19652	Rbm3	10358454	3.15118	95.5098
192285	Phf21a	10474006	3.14994	95.5041
19225	Ptgs2	10350516	3.14682	95.4984
14462	Gata3	10479981	3.14567	95.4927
272589	Tbcel	10592618	3.14523	95.4871
229279	Hnrnpa3	10528200	3.14004	95.4814
209416	Gpkow	10598381	3.13988	95.4757
102098	Arhgef18	10569733	3.13792	95.47
20024	Sub1	10427807	3.13182	95.4644
57437	Golga7	10577633	3.13109	95.4587
56468	Socs5	10447356	3.12644	95.453
66915	Myeov2	10356677	3.12594	95.4473
54667	Atp8b2	10499666	3.12314	95.4416
22193	Ube2e3	10473118	3.12247	95.436
67248	Rpl39	10427266	3.12052	95.4303
70533	Btf3l4	10411287	3.11715	95.4246
69563	2310015B20Rik	10363856	3.11703	95.4189
230779	Serinc2	10516765	3.11459	95.4133
97487	Cmtm4	10581061	3.11358	95.4076
17344	Pias2	10456814	3.11133	95.4019
277010	Marveld1	10463224	3.10847	95.3962
23983	Pcbp1	10545917	3.10841	95.3906
246103	Atxn7	10412741	3.1083	95.3849
20810	Srm	10510391	3.10728	95.3792
107765	Ankrd1	10467191	3.10604	95.3735
13178	Dck	10523012	3.10052	95.3678
107975	Pacs1	10464949	3.09832	95.3622
230761	Zfp362	10516520	3.09492	95.3565
67876	Coq10b	10346298	3.09458	95.3508
66258	Mrps17	10526049	3.09116	95.3451
229279	Hnrnpa3	10473008	3.08722	95.3395
15387	Hnrnpk	10554701	3.08694	95.3338
72881	Zdhhc4	10535458	3.08688	95.3281
59021	Rab2a	10529873	3.08678	95.3224
67070	Lsm14a	10562382	3.07954	95.3168
17118	Marcks	10368675	3.07899	95.3111
242291	Impad1	10511368	3.07489	95.3054
74585	Sppl3	10524647	3.07273	95.2997
433702	AU014645	10504703	3.07194	95.2941
66818	9130011J15Rik	10579736	3.07151	95.2884
78832	2700078E11Rik	10468816	3.07085	95.2827
100040260	Gm1862	10604661	3.06496	95.277
78651	Lsm6	10579833	3.06454	95.2713
67857	Ppp6c	10482323	3.06111	95.2657
70144	Lrch3	10435162	3.06075	95.26
20364	Sepw1	10560174	3.0593	95.2543
78825	5830417C01Rik	10352119	3.05697	95.2486
16562	Kif1c	10377953	3.05352	95.243
26949	Vat1	10391454	3.04939	95.2373
21769	Zfand3	10443589	3.04843	95.2316
110809	Sfrs1	10380210	3.04806	95.2259
19652	Rbm3	10603469	3.04745	95.2203
12798	Cnn2	10364593	3.04622	95.2146
15931	Ids	10604906	3.04596	95.2089
13865	Nr2f1	10410766	3.04274	95.2032
18148	Npm1	10583340	3.04215	95.1975
13345	Twist2	10348632	3.03726	95.1919
14593	Ggps1	10407833	3.03644	95.1862
215335	Slc36a1	10376216	3.03616	95.1805
22724	Zbtb7b	10499612	3.03547	95.1748
229279	Hnrnpa3	10437222	3.03447	95.1692
12868	Cox8a	10465633	3.03415	95.1635
72454	Ccdc71	10588936	3.0337	95.1578
108735	Sft2d2	10359713	3.03186	95.1521
23854	Def8	10576335	3.02988	95.1465
208968	Zfp280c	10604424	3.02969	95.1408
107260	Otub1	10465625	3.02888	95.1351
67733	Itgb3bp	10514658	3.02772	95.1294
219024	Tmem55b	10419542	3.02574	95.1238
20918	Eif1	10381115	3.01742	95.1181
12995	Csnk2a1	10350819	3.0167	95.1124
70510	Rnf167	10377927	3.0153	95.1067
69568	Vkorc1l1	10431014	3.01338	95.101
56444	Actr10	10396177	3.00617	95.0954
70681	Fam175a	10531776	3.00397	95.0897
22682	Zfand5	10461991	3.00221	95.084
103583	Fbxw11	10375103	3.00026	95.0783
72640	Mex3a	10493245	2.99963	95.0727
671652	Trav7-1	10414706	2.99905	95.067
74168	Zdhhc16	10463173	2.99869	95.0613
13205	Ddx3x	10546760	2.99569	95.0556
69082	Zc3h15	10579910	2.9951	95.05
230721	Pabpc4	10386543	2.99253	95.0443
18226	Nup62	10552740	2.98655	95.0386
16906	Lmnb1	10455813	2.9865	95.0329
11435	Chrna1	10483706	2.98622	95.0272
75747	Sesn3	10583242	2.98615	95.0216
12995	Csnk2a1	10477073	2.98391	95.0159
53424	Tsnax	10576532	2.98296	95.0102
53380	Psmd10	10607004	2.98214	95.0045
22629	Ywhah	10494662	2.9817	94.9989
69875	Ndufa11	10446166	2.97919	94.9932
74919	4930471M23Rik	10520513	2.97625	94.9875
101187	Parp11	10542040	2.97309	94.9818
18712	Pim1	10443527	2.97216	94.9762
545622	Ptpn3	10513145	2.9716	94.9705
20520	Slc22a5	10385872	2.97126	94.9648
76522	Lsm8	10536595	2.96957	94.9591
240614	Ranbp6	10466972	2.96609	94.9535
20641	Snrpd1	10453825	2.96517	94.9478
76267	Fads1	10461439	2.96288	94.9421
67437	Ssr3	10498519	2.96256	94.9364
66151	Prr13	10427235	2.95783	94.9307
68263	Pdhb	10417538	2.95774	94.9251
230721	Pabpc4	10386548	2.95548	94.9194
14790	Grcc10	10547789	2.95548	94.9137
78651	Lsm6	10388745	2.95407	94.908
13132	Dab2	10422728	2.95374	94.9024
56726	Sh3bgrl	10601449	2.95212	94.8967
21766	Tex261	10545751	2.9495	94.891
64050	Yeats4	10372629	2.94807	94.8853
638059	LOC638059	10484888	2.94764	94.8797
20257	Stmn2	10490818	2.94635	94.874
16561	Kif1b	10518585	2.94531	94.8683
67099	2310038H17Rik	10355147	2.94516	94.8626
16155	Il10rb	10436841	2.94189	94.8569
15516	Hsp90ab1	10451110	2.94061	94.8513
270669	Mbtps2	10607539	2.94015	94.8456
15382	Hnrnpa1	10454411	2.93659	94.8399
68031	Rnf146	10368490	2.93542	94.8342
56550	Ube2d2	10454842	2.93405	94.8286
72549	Reep4	10416290	2.93284	94.8229
11636	Ak1	10471474	2.93084	94.8172
16874	Lhx6	10482095	2.93079	94.8115
68512	1110019J04Rik	10512701	2.92556	94.8059
15382	Hnrnpa1	10602173	2.91469	94.8002
52123	Agpat5	10570573	2.91379	94.7945
22771	Zic1	10595695	2.9136	94.7888
14950	H13	10477147	2.913	94.7832
70122	Mllt3	10514255	2.91196	94.7775
78651	Lsm6	10577598	2.91037	94.7718
81004	Tbl1xr1	10491056	2.91024	94.7661
215160	Rhbdd2	10526356	2.90974	94.7604
230639	Cyp4a29	10421917	2.90298	94.7548
407243	Tmem189	10489912	2.902	94.7491
15382	Hnrnpa1	10427310	2.89929	94.7434
23994	Dazap2	10426921	2.89471	94.7377
110323	Cox6b1	10562059	2.8936	94.7321
214469	BC043098	10353794	2.89208	94.7264
78889	Wsb1	10388938	2.89056	94.7207
238799	Tnpo1	10411491	2.88895	94.715
22384	Eif4h	10534316	2.88282	94.7094
20319	Sfrp2	10492798	2.88237	94.7037
75608	Chmp4b	10477572	2.88167	94.698
73024	2900064A13Rik	10474588	2.88129	94.6923
21399	Tcea1	10426301	2.87994	94.6866
21855	Timm17b	10598482	2.87976	94.681
17067	Ly6c1	10429568	2.87973	94.6753
19210	Ptdss1	10405894	2.87921	94.6696
15289	Hmgb1	10604663	2.87871	94.6639
56354	Dnajc7	10391178	2.8754	94.6583
15382	Hnrnpa1	10597969	2.87235	94.6526
20822	Trove2	10358379	2.87116	94.6469
414077	BC056474	10573578	2.86848	94.6412
380840	Lyrm4	10408677	2.86835	94.6356
18148	Npm1	10363178	2.86712	94.6299
15388	Hnrnpl	10551600	2.86109	94.6242
52335	Atxn1l	10581636	2.85863	94.6185
52690	Setd3	10475987	2.85851	94.6129
22402	Wisp1	10424543	2.85775	94.6072
71929	Tmem123	10583145	2.85535	94.6015
21781	Tfdp1	10582981	2.85521	94.5958
59025	Usp14	10457409	2.85386	94.5901
208043	Setd1b	10525495	2.85188	94.5845
67788	6330577E15Rik	10463826	2.85088	94.5788
328563	Apol11b	10430190	2.84791	94.5731
72289	Malat1	10465244	2.84728	94.5674
621381	EG621381	10534096	2.84391	94.5618
66964	Golt1b	10542650	2.84175	94.5561
76108	Rap2a	10417065	2.83784	94.5504
104112	Acly	10391146	2.83554	94.5447
56550	Ube2d2	10498800	2.83466	94.5391
14314	Fstl1	10435641	2.83452	94.5334
66090	Ypel3	10557481	2.83301	94.5277
21833	Thra	10381006	2.83185	94.522
14225	Fkbp1a	10477012	2.83081	94.5163
67949	Mki67ip	10349239	2.82796	94.5107
11949	Atp5c1	10479996	2.82762	94.505
14056	Ezh2	10544501	2.82592	94.4993
211770	Trib1	10424370	2.82499	94.4936
545121	EG545121	10425628	2.82467	94.488
13207	Ddx5	10385484	2.82213	94.4823
80914	Uck2	10359851	2.81983	94.4766
67933	Hcfc2	10365242	2.81885	94.4709
13859	Eps15l1	10579663	2.81884	94.4653
20250	Scd2	10463355	2.81874	94.4596
55950	Bri3	10527327	2.81864	94.4539
20229	Sat1	10607467	2.81828	94.4482
387524	Znrf2	10538413	2.81812	94.4426
12453	Ccni	10415574	2.81703	94.4369
18029	Nfic	10371176	2.81613	94.4312
15289	Hmgb1	10402750	2.81484	94.4255
67568	Mrfap1	10445674	2.81268	94.4198
19224	Ptgs1	10471721	2.81022	94.4142
11774	Ap3b1	10406681	2.80954	94.4085
13731	Emp2	10437639	2.80712	94.4028
67374	Jam2	10436666	2.80621	94.3971
215436	Slc35e3	10372682	2.80297	94.3915
66665	5730528L13Rik	10504884	2.80269	94.3858
15531	Ndst1	10459089	2.80106	94.3801
225998	Rorb	10466587	2.80094	94.3744
20655	Sod1	10436783	2.80011	94.3688
13205	Ddx3x	10598723	2.7993	94.3631
74108	Parn	10437778	2.79824	94.3574
56338	Txnip	10494428	2.79649	94.3517
69870	Polr3gl	10500362	2.79605	94.346
23837	Cfdp1	10581902	2.79451	94.3404
20018	Rpo1-3	10503911	2.79373	94.3347
14815	Nr3c1	10458569	2.79193	94.329
105787	Prkaa1	10422707	2.7913	94.3233
50772	Mapk6	10594988	2.78817	94.3177
56392	Shoc2	10464015	2.78741	94.312
621381	EG621381	10503915	2.7868	94.3063
66854	Trim35	10416082	2.78652	94.3006
668686	OTTMUSG00000007194	10501313	2.78552	94.295
224250	Cldnd1	10436402	2.78275	94.2893
52014	Nus1	10363137	2.78172	94.2836
11630	Aim1	10368947	2.78065	94.2779
17134	Mafg	10393877	2.77969	94.2723
28015	Grinl1a	10594835	2.7773	94.2666
211922	A630054L15Rik	10413282	2.77693	94.2609
15289	Hmgb1	10394142	2.77682	94.2552
18195	Nsf	10391963	2.77674	94.2495
17112	Tm4sf1	10498273	2.77605	94.2439
27058	Srp9	10352393	2.77583	94.2382
12390	Cav2	10536494	2.77524	94.2325
545622	Ptpn3	10513152	2.77493	94.2268
66257	Nicn1	10588876	2.77399	94.2212
72826	2810485I05Rik	10583228	2.77354	94.2155
12068	Bet1	10542959	2.77284	94.2098
14739	S1pr2	10591412	2.77272	94.2041
544782	OTTMUSG00000007757	10507851	2.77192	94.1985
14609	Gja1	10363173	2.7717	94.1928
52690	Setd3	10402564	2.76891	94.1871
319757	Smo	10536917	2.76882	94.1814
18000	2014-09-03	10348817	2.76835	94.1757
19823	Rnf7	10595803	2.76703	94.1701
235442	Rab8b	10594645	2.76662	94.1644
229279	Hnrnpa3	10599972	2.76578	94.1587
16599	Klf3	10522051	2.76458	94.153
68026	2810417H13Rik	10350838	2.76296	94.1474
20492	Slbp	10412559	2.76277	94.1417
67306	3110050N22Rik	10490802	2.76154	94.136
68026	2810417H13Rik	10586448	2.76114	94.1303
17126	Smad2	10456764	2.75949	94.1247
56309	Mycbp	10507885	2.75742	94.119
17536	Meis2	10486041	2.75662	94.1133
66756	4933411K20Rik	10571647	2.75656	94.1076
18516	Pbx3	10481857	2.75442	94.102
22235	Ugdh	10530201	2.75398	94.0963
59013	Hnrnph1	10375735	2.75377	94.0906
208198	Btbd2	10370920	2.75235	94.0849
381085	Tbc1d22b	10443535	2.75203	94.0792
72981	Prkrir	10555179	2.75027	94.0736
14105	Fusip1	10407993	2.74931	94.0679
72425	2410042D21Rik	10474577	2.74688	94.0622
72572	Spats2	10426689	2.74625	94.0565
16880	Lifr	10422822	2.74539	94.0509
14030	Ewsr1	10383943	2.74184	94.0452
22631	Ywhaz	10428204	2.73783	94.0395
66923	Pbrm1	10413695	2.73371	94.0338
66922	Rras2	10567043	2.73123	94.0282
28146	Serp1	10498319	2.73028	94.0225
625534	EG625534	10350590	2.72863	94.0168
102193	Zdhhc7	10582171	2.72833	94.0111
100038833	OTTMUSG00000007516	10385426	2.72787	94.0054
68050	Akirin1	10516213	2.72771	93.9998
53382	Txnl1	10459375	2.7265	93.9941
56637	Gsk3b	10435676	2.72564	93.9884
66052	Sdhc	10360046	2.72537	93.9827
12928	Crk	10378732	2.72399	93.9771
67466	Pdcl	10482139	2.72325	93.9714
17436	Me1	10405753	2.72234	93.9657
17134	Mafg	10393881	2.72061	93.96
73847	5430432M24Rik	10488589	2.72053	93.9544
19155	Npepps	10390381	2.71991	93.9487
75234	Rnf19b	10508392	2.71758	93.943
29861	Dpf1	10551741	2.71568	93.9373
67712	Slc25a37	10421172	2.71304	93.9317
67166	Arl8b	10540480	2.71275	93.926
68095	Ociad1	10522396	2.71245	93.9203
30960	Vapa	10452470	2.71195	93.9146
15361	Hmga1	10443195	2.71084	93.9089
13629	Eef2	10364990	2.70773	93.9033
19047	Ppp1cc	10556764	2.70606	93.8976
100042959	100042959	10410970	2.70467	93.8919
66884	Appbp2	10389373	2.70444	93.8862
19650	Rbl1	10489127	2.70431	93.8806
210808	9030625A04Rik	10421697	2.70408	93.8749
68119	Cmtm3	10574471	2.70149	93.8692
66629	Golph3	10423172	2.70134	93.8635
68250	5730536A07Rik	10586484	2.70052	93.8579
20462	Sfrs10	10438621	2.69999	93.8522
105522	Ankrd28	10418766	2.6987	93.8465
110391	Qdpr	10529895	2.69783	93.8408
170936	Zfp369	10405853	2.69501	93.8351
57357	Srd5a3	10522589	2.69193	93.8295
74277	Chic2	10530683	2.69164	93.8238
109263	Rlf	10516027	2.69155	93.8181
107272	Psat1	10466410	2.69121	93.8124
72194	Fbxl20	10390574	2.69081	93.8068
208691	Eif5a2	10491182	2.6899	93.8011
67979	Atad1	10467091	2.68927	93.7954
216965	Taok1	10388684	2.68784	93.7897
67726	1810073G14Rik	10386095	2.6869	93.7841
226016	5730446C15Rik	10461999	2.68658	93.7784
54411	Atp6ap1	10600377	2.68636	93.7727
12064	Bdnf	10474399	2.68247	93.767
66999	Med28	10521725	2.68146	93.7614
94213	Ddx50	10369647	2.68039	93.7557
58194	Sh3kbp1	10602840	2.67897	93.75
66241	Tmem9	10350188	2.67795	93.7443
69274	Ctdspl	10590060	2.67779	93.7386
100040259	LOC100040259	10370021	2.67617	93.733
207740	1500031H01Rik	10437451	2.67541	93.7273
12757	Clta	10504458	2.67471	93.7216
14155	Fem1b	10594315	2.67361	93.7159
72129	Pex13	10384717	2.67227	93.7103
27058	Srp9	10473547	2.67201	93.7046
100047445	LOC100047445	10604633	2.66714	93.6989
67860	S100a16	10493798	2.66623	93.6932
76687	Spcs3	10578703	2.66621	93.6876
20937	Suv39h1	10603431	2.66599	93.6819
545622	Ptpn3	10513154	2.66584	93.6762
232314	Ppp4r2	10540283	2.66513	93.6705
78977	Popdc3	10362959	2.66506	93.6649
22629	Ywhah	10521031	2.66496	93.6592
22195	Ube2l3	10438109	2.662	93.6535
56455	Dynll1	10532984	2.6615	93.6478
73046	Glrx5	10398085	2.65663	93.6421
16468	Jarid2	10404848	2.65526	93.6365
18933	Prrx1	10359624	2.65353	93.6308
68614	Letmd1	10426909	2.65242	93.6251
21780	Tfam	10369867	2.64975	93.6194
320191	Hook3	10577922	2.64654	93.6138
19047	Ppp1cc	10525352	2.64627	93.6081
71970	2410018M08Rik	10518453	2.64563	93.6024
26384	Gnpda1	10458547	2.64275	93.5967
18514	Pbx1	10359870	2.64256	93.5911
666421	EG666421	10434670	2.64247	93.5854
67210	Gatad1	10527888	2.64238	93.5797
30045	Dnajc12	10363669	2.63939	93.574
17931	Ppp1r12a	10366238	2.63847	93.5683
225228	EG225228	10458757	2.63691	93.5627
385138	BC061237	10414269	2.63635	93.557
67035	Dnajb4	10502823	2.63551	93.5513
226548	Aph1a	10359428	2.63544	93.5456
16007	Cyr61	10502655	2.63414	93.54
434356	EG434356	10597573	2.63364	93.5343
19822	Rnf4	10521174	2.63264	93.5286
16564	Kif21a	10431659	2.63257	93.5229
69046	Isca1	10403934	2.63236	93.5173
14679	Gnai3	10501265	2.63098	93.5116
14489	Mtpn	10543944	2.63027	93.5059
67458	Ergic1	10443009	2.62901	93.5002
23828	Bves	10362968	2.62721	93.4946
66384	Srp19	10454674	2.6268	93.4889
667952	EG667952	10581308	2.62598	93.4832
77113	Klhl2	10578922	2.62553	93.4775
74319	1110005A03Rik	10382848	2.62506	93.4718
12343	Capza2	10536527	2.62238	93.4662
17967	Ncam1	10593293	2.62229	93.4605
14137	Fdft1	10412911	2.62193	93.4548
210106	Pols	10410435	2.62097	93.4491
17357	Marcksl1	10508465	2.6199	93.4435
22320	Vamp8	10545409	2.61899	93.4378
22327	Vbp1	10600524	2.61727	93.4321
71085	Arhgap19	10467637	2.61691	93.4264
13557	E2f3	10408477	2.6168	93.4208
100737	Dcun1d4	10522430	2.61617	93.4151
27878	Tada1l	10351390	2.61616	93.4094
664840	OTTMUSG00000007822	10505917	2.61597	93.4037
13730	Emp1	10542355	2.61597	93.398
18108	Nmt2	10468929	2.61578	93.3924
381924	Itgad	10557925	2.61521	93.3867
269831	Tspan12	10543306	2.61324	93.381
70382	Kctd2	10382516	2.61126	93.3753
223255	Stk24	10422396	2.60641	93.3697
667496	EG667496	10605429	2.60625	93.364
79362	Bhlhb3	10549276	2.60622	93.3583
100044855	LOC100044855	10543118	2.60596	93.3526
16842	Lef1	10496091	2.60591	93.347
51796	Srrm1	10517345	2.6058	93.3413
235574	Atp2c1	10596347	2.60545	93.3356
226591	Tiprl	10359723	2.60515	93.3299
26943	Serinc3	10489377	2.6046	93.3243
56224	Tspan5	10496494	2.60326	93.3186
66942	Ddx18	10546805	2.60188	93.3129
270110	Irf2bp2	10582811	2.60004	93.3072
15289	Hmgb1	10455439	2.59925	93.3015
67150	Rnf141	10566926	2.597	93.2959
15289	Hmgb1	10542038	2.59689	93.2902
66087	Tmem111	10546944	2.59656	93.2845
71149	4933413G19Rik	10542079	2.5964	93.2788
11840	Arf1	10456974	2.59627	93.2732
20408	Sh3gl3	10554588	2.59555	93.2675
26931	Ppp2r5c	10398461	2.59531	93.2618
69605	Lnp	10483770	2.59528	93.2561
15361	Hmga1	10383479	2.59488	93.2505
20382	Sfrs2	10393395	2.59446	93.2448
100048378	LOC100048378	10582835	2.59437	93.2391
17220	Mcm7	10534974	2.59336	93.2334
17904	Myl6	10373396	2.59207	93.2277
321022	Cdv3	10596185	2.59201	93.2221
76824	2410166I05Rik	10517263	2.59198	93.2164
11804	Aplp2	10592023	2.59124	93.2107
58859	Efemp2	10460603	2.59101	93.205
12455	Ccnt1	10432180	2.59077	93.1994
226517	Smg7	10358757	2.58961	93.1937
12521	Cd82	10485213	2.58917	93.188
80795	Selk	10413497	2.58454	93.1823
27373	Csnk1e	10430519	2.58388	93.1767
107515	Lgr4	10474419	2.58346	93.171
226548	Aph1a	10494312	2.58182	93.1653
545622	Ptpn3	10513162	2.57947	93.1596
19244	Ptp4a2	10508479	2.57909	93.154
12452	Ccng2	10523297	2.57862	93.1483
18792	Plau	10413047	2.57852	93.1426
319939	Tns3	10384233	2.5782	93.1369
234358	D10627	10572161	2.57791	93.1312
11308	Abi1	10480423	2.57761	93.1256
67630	Samd8	10413125	2.57526	93.1199
12314	Calm2	10453451	2.57463	93.1142
69089	Oxa1l	10415030	2.57427	93.1085
545756	EG545756	10522301	2.57424	93.1029
209586	Nudcd3	10384092	2.57339	93.0972
98910	Usp6nl	10469110	2.57288	93.0915
100043719	ENSMUSG00000040540	10367544	2.57243	93.0858
56214	Scamp4	10364814	2.57196	93.0802
14569	Gdi2	10403258	2.57063	93.0745
77582	Mboat7	10559436	2.57062	93.0688
18616	Peg3	10559796	2.57057	93.0631
11840	Arf1	10386370	2.56936	93.0574
19317	Qk	10447708	2.56816	93.0518
210982	BC032203	10451481	2.56763	93.0461
67143	Ikzf5	10568529	2.56731	93.0404
319745	D130067C23Rik	10483633	2.56599	93.0347
22142	Tuba1a	10432404	2.56584	93.0291
57743	Sec61a2	10479887	2.56562	93.0234
320438	Alg6	10506154	2.56538	93.0177
19271	Ptprj	10484894	2.5642	93.012
50850	Spast	10446785	2.56321	93.0064
330948	EG330948	10585697	2.56244	93.0007
18045	Nfyb	10371307	2.56058	92.995
66704	Rbm4b	10460461	2.56035	92.9893
105559	Mbnl2	10417053	2.55977	92.9837
58998	Pvrl3	10439766	2.55951	92.978
232910	Ap2s1	10550326	2.55929	92.9723
11491	Adam17	10399605	2.55913	92.9666
110959	Nudt19	10562480	2.55859	92.9609
228033	Atp5g3	10483756	2.55828	92.9553
67245	Peli1	10374485	2.55825	92.9496
13078	Cyp1b1	10453057	2.55745	92.9439
17122	Mxd4	10529375	2.55736	92.9382
211895	Gm1815	10578391	2.55713	92.9326
13714	Elk4	10349752	2.5561	92.9269
15289	Hmgb1	10600545	2.55601	92.9212
93692	Glrx	10406270	2.55553	92.9155
140482	Zfp358	10569767	2.55478	92.9099
546071	Mast3	10579373	2.55478	92.9042
67420	Far1	10556491	2.55414	92.8985
67615	Ube2r2	10504047	2.55344	92.8928
20823	Ssb	10472605	2.55325	92.8871
12400	Cbfb	10574632	2.55291	92.8815
232798	Leng8	10549615	2.55274	92.8758
71991	Ercc8	10407057	2.55262	92.8701
56758	Mbnl1	10492310	2.55196	92.8644
15289	Hmgb1	10531579	2.55084	92.8588
216080	Ube2d1	10369877	2.55044	92.8531
71955	2400003C14Rik	10581625	2.54954	92.8474
667952	EG667952	10420011	2.54855	92.8417
27973	Vkorc1	10568328	2.54795	92.8361
54375	Azin1	10428310	2.54324	92.8304
74150	Slc35f5	10349383	2.54254	92.8247
20844	Stam	10469335	2.54213	92.819
67840	Mrp63	10415645	2.54193	92.8134
53872	Caprin1	10485514	2.54097	92.8077
625781	Hmgb1l	10497483	2.54081	92.802
81018	Rnf114	10478875	2.54001	92.7963
26357	Abcg2	10538640	2.53846	92.7906
60599	Trp53inp1	10503259	2.53838	92.785
18824	Plp2	10473022	2.53785	92.7793
69900	Mfsd11	10382852	2.53498	92.7736
77578	Bcl9	10500434	2.53353	92.7679
229877	Rap1gds1	10502419	2.53211	92.7623
12453	Ccni	10531488	2.53112	92.7566
225215	BC003885	10587042	2.53072	92.7509
11757	Prdx3	10468869	2.53042	92.7452
23827	Bpnt1	10352503	2.53014	92.7396
22764	Zfx	10605729	2.52955	92.7339
13476	Reep5	10458090	2.52948	92.7282
56458	Foxo1	10491962	2.52879	92.7225
26413	Mapk1	10433940	2.52849	92.7168
20014	Rpn2	10477946	2.52842	92.7112
231070	Insig1	10520362	2.52825	92.7055
69556	2310022M17Rik	10384968	2.52739	92.6998
18824	Plp2	10411359	2.52638	92.6941
11852	Rhob	10399360	2.52591	92.6885
74617	Scpep1	10389719	2.52346	92.6828
11464	Actc1	10485982	2.52331	92.6771
27061	Bcap31	10605081	2.5219	92.6714
110639	Prps2	10607877	2.52162	92.6658
632394	OTTMUSG00000016083	10477852	2.52091	92.6601
15289	Hmgb1	10565589	2.52027	92.6544
268291	Rnf217	10368577	2.52023	92.6487
68598	Dnajc8	10508727	2.51994	92.6431
17904	Myl6	10354372	2.51934	92.6374
103466	Nt5dc3	10365518	2.51926	92.6317
18597	Pdha1	10607587	2.51915	92.626
223828	Pphln1	10426439	2.51831	92.6203
674543	LOC674543	10500543	2.5176	92.6147
19357	Rad21	10428561	2.51747	92.609
20630	Snrpc	10426477	2.51694	92.6033
57339	Jph1	10353311	2.51666	92.5976
100040502	100040502	10521589	2.51653	92.592
53901	Rcan2	10445325	2.5156	92.5863
105428	AA536717	10412960	2.51459	92.5806
66921	Prpf38b	10501447	2.51458	92.5749
668763	EG668763	10569288	2.51327	92.5693
12226	Btg1	10365971	2.5131	92.5636
66874	1200014J11Rik	10378271	2.51224	92.5579
22333	Vdac1	10375941	2.5116	92.5522
110829	Lims1	10363265	2.51156	92.5465
78232	Trappc6b	10400538	2.51128	92.5409
18140	Uhrf1	10446074	2.5104	92.5352
216971	BC017647	10379030	2.50948	92.5295
73158	Larp1	10376292	2.50895	92.5238
77305	Wdr82	10588454	2.50822	92.5182
27965	Spg21	10586405	2.50821	92.5125
68939	Rasl11b	10522467	2.50804	92.5068
11773	Ap2m1	10434384	2.50756	92.5011
67075	Magt1	10606301	2.50664	92.4955
69709	2410017P09Rik	10394286	2.50607	92.4898
66713	Actr2	10384522	2.50586	92.4841
545845	LOC545845	10538855	2.50323	92.4784
225027	Sfrs7	10453102	2.50308	92.4728
56486	Gabarap	10377689	2.50304	92.4671
638407	LOC638407	10456246	2.50269	92.4614
22666	Zfp161	10446581	2.50217	92.4557
73945	Otud4	10573027	2.50099	92.45
11461	Actb	10535381	2.49997	92.4444
218236	BC010304	10409099	2.49783	92.4387
57376	Smarce1	10390768	2.49733	92.433
207565	Camkk2	10533529	2.49717	92.4273
215798	Gpr126	10367982	2.49654	92.4217
228960	Stx16	10479087	2.49625	92.416
15289	Hmgb1	10453252	2.4955	92.4103
76479	Smndc1	10532275	2.49492	92.4046
215015	C530043G21Rik	10359190	2.49487	92.399
75577	2310002L13Rik	10459633	2.49199	92.3933
140546	Prnpip1	10507484	2.49191	92.3876
54197	Rnf5	10450206	2.49146	92.3819
53599	Cd164	10362803	2.4912	92.3762
17936	Nab1	10354494	2.49106	92.3706
21945	Dedd	10351574	2.49033	92.3649
75939	4930579G24Rik	10492679	2.48568	92.3592
233805	Dcun1d3	10567423	2.48506	92.3535
15289	Hmgb1	10569994	2.4847	92.3479
74718	Snx16	10497309	2.48464	92.3422
76306	1110021L09Rik	10362115	2.48432	92.3365
320184	Lrrc58	10435654	2.48364	92.3308
170439	Elovl6	10495993	2.4833	92.3252
16195	Il6st	10407173	2.48313	92.3195
22330	Vcl	10413059	2.48163	92.3138
100040259	LOC100040259	10561806	2.48161	92.3081
17299	Mettl1	10366796	2.48107	92.3025
68197	Ndufc2	10555055	2.48081	92.2968
74125	Armc8	10595990	2.48067	92.2911
27041	G3bp1	10376230	2.48049	92.2854
70640	Dcp2	10455472	2.4802	92.2797
245828	Trappc1	10377508	2.47826	92.2741
16181	Il1rn	10469816	2.47788	92.2684
100048378	LOC100048378	10497325	2.47773	92.2627
209357	Gtf2h3	10525766	2.47688	92.257
218341	Rfesd	10410709	2.47584	92.2514
71750	R3hdm2	10366909	2.47552	92.2457
65106	Arl6ip5	10540241	2.47536	92.24
18032	Nfix	10580191	2.47431	92.2343
627543	EG627543	10439891	2.47324	92.2287
66861	Dnajc10	10473190	2.473	92.223
15289	Hmgb1	10566142	2.47264	92.2173
15289	Hmgb1	10400153	2.47254	92.2116
56353	Rybp	10546706	2.47159	92.2059
20492	Slbp	10529299	2.47155	92.2003
76448	2310014H01Rik	10444932	2.47127	92.1946
20848	Stat3	10391301	2.46939	92.1889
629446	LOC629446	10367744	2.46929	92.1832
20778	Scarb1	10533929	2.4686	92.1776
107939	Pom121	10534441	2.46846	92.1719
68201	Ccdc34	10474437	2.46769	92.1662
19325	Rab10	10399214	2.46654	92.1605
11674	Aldoa	10568050	2.46604	92.1549
15381	Hnrnpc	10419607	2.4653	92.1492
219105	Zmym5	10420348	2.46444	92.1435
56515	Rnf138	10454202	2.46421	92.1378
212862	Chpt1	10371616	2.46404	92.1322
23794	Adamts5	10440534	2.46375	92.1265
68728	Trp53inp2	10477644	2.46325	92.1208
67948	Fbxo28	10360794	2.46191	92.1151
17354	Mllt10	10469475	2.46164	92.1094
67952	Tomm20	10582814	2.46127	92.1038
676910	LOC676910	10503281	2.46105	92.0981
18759	Prkci	10491279	2.46065	92.0924
67976	Trabd	10426157	2.4605	92.0867
72776	Sass6	10495574	2.45893	92.0811
225215	BC003885	10454063	2.45892	92.0754
18718	Pip4k2a	10480347	2.45828	92.0697
70380	Mospd1	10604630	2.45756	92.064
20588	Smarcc1	10589466	2.45752	92.0584
100041437	100041437	10405741	2.4567	92.0527
12321	Calu	10536818	2.45664	92.047
14673	Gna12	10535273	2.45661	92.0413
23980	Pebp1	10533085	2.4559	92.0356
68897	Disp1	10598178	2.4545	92.03
66935	1700023B02Rik	10483667	2.45413	92.0243
66491	Polr2l	10569200	2.45411	92.0186
11600	Angpt1	10428376	2.45409	92.0129
66849	Ppp1r2	10439005	2.45397	92.0073
100047235	LOC100047235	10398972	2.45223	92.0016
54338	Slc23a2	10487906	2.452	91.9959
20677	Sox4	10408450	2.45197	91.9902
234344	Naf1	10572077	2.45052	91.9846
407821	Znrf3	10383982	2.44936	91.9789
108912	Cdca2	10421029	2.44922	91.9732
11737	Anp32a	10586064	2.44845	91.9675
103266	AI597468	10365420	2.44838	91.9619
15289	Hmgb1	10570470	2.44686	91.9562
620480	EG620480	10565341	2.44633	91.9505
75965	Zdhhc20	10420439	2.4462	91.9448
230075	Ndufb6	10512093	2.44302	91.9391
15247	Hiat1	10501676	2.443	91.9335
100047670	LOC100047670	10545298	2.44228	91.9278
14726	Pdpn	10518147	2.44081	91.9221
56348	Hsd17b12	10485294	2.44023	91.9164
15289	Hmgb1	10591881	2.43885	91.9108
76055	Mgea5	10468089	2.43858	91.9051
18824	Plp2	10603346	2.43782	91.8994
66694	Uqcrfs1	10408487	2.43677	91.8937
13822	Epb4.1l2	10362245	2.43658	91.8881
223827	Glt8d3	10431722	2.43435	91.8824
74257	Tspan17	10405343	2.4342	91.8767
66083	Setd6	10582699	2.43313	91.871
13716	Ell	10572419	2.43303	91.8653
15289	Hmgb1	10462361	2.43284	91.8597
109934	Abr	10388545	2.43253	91.854
77590	4631426J05Rik	10568553	2.43242	91.8483
66168	Grina	10424781	2.43241	91.8426
229589	Prune	10500133	2.43172	91.837
17210	Mcl1	10494306	2.43161	91.8313
19222	Ptgir	10550394	2.43078	91.8256
140917	Dclre1b	10500837	2.43051	91.8199
56438	Rbx1	10450646	2.4301	91.8143
56551	Txn2	10430247	2.42981	91.8086
106581	Itfg3	10449266	2.42968	91.8029
54720	Rcan1	10440993	2.42936	91.7972
218335	Clptm1l	10406067	2.42759	91.7916
12454	Ccnk	10398195	2.42743	91.7859
80888	Hspb8	10533050	2.42725	91.7802
21858	Timp2	10393559	2.42621	91.7745
15529	Sdc2	10423548	2.42597	91.7688
260409	Cdc42ep3	10453049	2.42574	91.7632
26440	Psma1	10567072	2.42542	91.7575
100532	Rell1	10530130	2.42496	91.7518
53619	Blcap	10489190	2.4249	91.7461
18176	Nras	10494857	2.42428	91.7405
545622	Ptpn3	10513139	2.42407	91.7348
217869	Eif5	10398678	2.42405	91.7291
12366	Casp2	10537728	2.42397	91.7234
26417	Mapk3	10557459	2.42356	91.7178
15289	Hmgb1	10386949	2.42325	91.7121
15289	Hmgb1	10353341	2.42305	91.7064
17258	Mef2a	10564451	2.42305	91.7007
72128	2610008E11Rik	10370544	2.42292	91.695
214812	Zfp609	10594551	2.42261	91.6894
216965	Taok1	10388682	2.42241	91.6837
15950	Ifi203	10360391	2.42221	91.678
12633	Cflar	10346551	2.42134	91.6723
69046	Isca1	10409799	2.42079	91.6667
70292	Afap1	10521440	2.42076	91.661
67605	Akt1s1	10552752	2.41972	91.6553
26370	Cetn2	10604974	2.41953	91.6496
319710	Frmd6	10396170	2.4173	91.644
16367	Irs1	10356084	2.41715	91.6383
102580	Alg9	10585233	2.41654	91.6326
12615	Cenpa	10520521	2.41631	91.6269
98758	Hnrnpf	10604501	2.41625	91.6213
18749	Prkacb	10502732	2.41612	91.6156
17164	Mapkapk2	10357579	2.41555	91.6099
70178	2210412D01Rik	10565288	2.41539	91.6042
12608	Cebpb	10478890	2.41537	91.5985
26921	Map4k4	10345715	2.41497	91.5929
51886	Fubp1	10496892	2.41485	91.5872
100039350	ENSMUSG00000068584	10450904	2.41424	91.5815
20779	Src	10477970	2.41414	91.5758
244631	Pskh1	10574939	2.41377	91.5702
76626	Msi2	10389680	2.41369	91.5645
81004	Tbl1xr1	10491038	2.41345	91.5588
216874	Camta2	10387944	2.41331	91.5531
218210	Nup153	10408952	2.41187	91.5475
668529	EG668529	10568363	2.41112	91.5418
15902	Id2	10399691	2.41101	91.5361
21399	Tcea1	10344633	2.41096	91.5304
14433	Gapdh	10386947	2.41088	91.5248
545622	Ptpn3	10513141	2.40988	91.5191
21812	Tgfbr1	10504817	2.40941	91.5134
80876	Ifitm2	10383756	2.40893	91.5077
208177	Phldb2	10439710	2.40797	91.502
22433	Xbp1	10374035	2.40758	91.4964
116733	Vps4a	10575129	2.40709	91.4907
18521	Pcbp2	10427241	2.40643	91.485
24015	Abce1	10579874	2.40579	91.4793
77864	Ypel2	10389581	2.40491	91.4737
15490	Hsd17b7	10359917	2.40403	91.468
100434	Slc44a1	10505008	2.40366	91.4623
70025	Acot7	10510687	2.40218	91.4566
74136	Sec14l1	10382890	2.40183	91.451
76302	Pcnp	10544570	2.40135	91.4453
216154	Med16	10370665	2.40064	91.4396
14070	F8a	10600144	2.40029	91.4339
319749	C230078M08Rik	10443007	2.39982	91.4282
19400	Rapsn	10473783	2.39966	91.4226
68192	Leprotl1	10578149	2.39964	91.4169
14681	Gnao1	10573979	2.3993	91.4112
67568	Mrfap1	10529581	2.39766	91.4055
15289	Hmgb1	10429455	2.39682	91.3999
100041386	100041386	10553857	2.39642	91.3942
59052	Mettl9	10557069	2.39641	91.3885
74442	Sgms2	10502224	2.39604	91.3828
80289	Lysmd3	10406419	2.39599	91.3772
12177	Bnip3l	10394800	2.39585	91.3715
18412	Sqstm1	10385572	2.39457	91.3658
667952	EG667952	10503399	2.39444	91.3601
100169	Phactr4	10516910	2.39142	91.3545
112407	Egln3	10400304	2.39122	91.3488
58246	Slc35b4	10543846	2.39072	91.3431
15259	Hipk3	10485562	2.39042	91.3374
242481	Palm2	10505120	2.39008	91.3317
12569	Cdk5r1	10379482	2.38988	91.3261
268470	Ube2z	10390227	2.38958	91.3204
67886	Camsap1l1	10358191	2.3888	91.3147
70686	Dusp16	10548735	2.3874	91.309
27528	D0H4S114	10458046	2.38727	91.3034
15427	Hoxc9	10427286	2.38703	91.2977
14897	Trip12	10356194	2.38596	91.292
12192	Zfp36l1	10401238	2.38567	91.2863
17069	Ly6e	10424676	2.38554	91.2807
23885	Gmcl1	10545940	2.3854	91.275
13016	Ctbp1	10529273	2.38491	91.2693
231386	Ythdc1	10522802	2.38447	91.2636
57342	Parva	10556426	2.38343	91.2579
67143	Ikzf5	10497996	2.38308	91.2523
70892	Ttll7	10496854	2.38267	91.2466
66158	Cxx1a	10604637	2.38263	91.2409
230971	Megf6	10510859	2.3813	91.2352
23950	Dnajb6	10481868	2.37983	91.2296
74525	8430419L09Rik	10542340	2.37885	91.2239
12611	Cebpg	10562416	2.37859	91.2182
382030	Tmem188	10573703	2.37814	91.2125
19860	Rnu3b3	10380063	2.37796	91.2069
19860	Rnu3b3	10380059	2.37796	91.2069
19860	Rnu3b3	10380065	2.37796	91.2069
19860	Rnu3b3	10380061	2.37796	91.2069
226844	Flvcr1	10361065	2.37733	91.1842
110052	Dek	10409031	2.37572	91.1785
15117	Has2	10428707	2.37547	91.1728
18002	Nedd8	10420089	2.37535	91.1671
667609	OTTMUSG00000011448	10480379	2.37535	91.1671
71707	Ubiad1	10518520	2.37466	91.1558
56336	B4galt5	10489891	2.37432	91.1501
67952	Tomm20	10477370	2.37333	91.1444
66092	Ghitm	10419038	2.3726	91.1387
629959	EG629959	10397249	2.37125	91.1331
20320	Nptn	10585842	2.37111	91.1274
15289	Hmgb1	10552337	2.37074	91.1217
15289	Hmgb1	10408687	2.37046	91.116
70579	Zc3h11a	10357814	2.37038	91.1104
12193	Zfp36l2	10453272	2.37029	91.1047
100047043	LOC100047043	10473240	2.37004	91.099
100047043	LOC100047043	10455595	2.37004	91.099
237336	Tbpl1	10368229	2.36903	91.0876
74467	Pus10	10374706	2.36868	91.082
228482	Arhgap11a	10485963	2.36811	91.0763
15289	Hmgb1	10496835	2.36786	91.0706
75735	Pank1	10467162	2.36767	91.0649
67148	2610204K14Rik	10554569	2.36751	91.0593
76302	Pcnp	10439980	2.36729	91.0536
245866	Ift52	10478341	2.36625	91.0479
17436	Me1	10595480	2.36515	91.0422
13427	Dync1i2	10472764	2.36323	91.0366
321022	Cdv3	10510165	2.36289	91.0309
97112	Nmd3	10492598	2.36275	91.0252
21345	Tagln	10593123	2.36162	91.0195
19850	Rnu3a	10362674	2.36148	91.0139
224088	Atp13a3	10438911	2.36093	91.0082
14955	H19	10569335	2.36013	91.0025
18738	Pitpna	10378668	2.35977	90.9968
67231	Tbc1d20	10477090	2.35962	90.9911
17168	Mare	10385004	2.3595	90.9855
22110	Tspyl1	10362487	2.35924	90.9798
54132	Pdlim1	10520950	2.35913	90.9741
223601	0910001A06Rik	10428983	2.35865	90.9684
15354	Hmgb3	10352954	2.35853	90.9628
94112	Med15	10438198	2.3585	90.9571
66552	2010106G01Rik	10487321	2.35829	90.9514
15354	Hmgb3	10600017	2.358	90.9457
319277	A230046K03Rik	10365302	2.35706	90.9401
19934	Rpl22	10510720	2.35703	90.9344
66361	Zfand1	10497300	2.35641	90.9287
54473	Tollip	10569265	2.35606	90.923
59014	Rrs1	10344723	2.35568	90.9173
224111	Ubxn7	10435031	2.35516	90.9117
12912	Creb1	10346943	2.35273	90.906
228983	Osbpl2	10479335	2.35202	90.9003
546723	EG546723	10467003	2.35141	90.8946
628412	EG628412	10527970	2.35064	90.889
665957	EG665957	10401050	2.35062	90.8833
100042241	100042241	10458841	2.35029	90.8776
68628	Fbxw9	10573549	2.34894	90.8719
665433	RP23-480B19.10	10494390	2.34615	90.8663
12675	Chuk	10467921	2.34561	90.8606
102414	Clk3	10593988	2.34384	90.8549
629557	EG629557	10593490	2.34246	90.8492
14455	Gas5	10351026	2.34199	90.8436
433273	EG433273	10353189	2.34145	90.8379
270685	Mthfd1l	10367641	2.3395	90.8322
546723	EG546723	10540072	2.33929	90.8265
668166	Zxdb	10600819	2.33886	90.8208
75210	Prr3	10450669	2.33829	90.8152
12576	Cdkn1b	10542317	2.3376	90.8095
625781	Hmgb1l	10548600	2.33714	90.8038
54635	Pdgfc	10492689	2.3371	90.7981
11843	Arf4	10413304	2.33688	90.7925
80876	Ifitm2	10569014	2.33686	90.7868
15182	Hdac2	10362520	2.33523	90.7811
19736	Rgs4	10359908	2.33509	90.7754
26931	Ppp2r5c	10398455	2.33425	90.7698
67148	2610204K14Rik	10584758	2.33419	90.7641
66471	Anp32e	10494322	2.33341	90.7584
69718	Ipmk	10363894	2.33327	90.7527
73710	Tubb2b	10408613	2.33279	90.747
12505	Cd44	10485405	2.33277	90.7414
100044517	LOC100044517	10552118	2.3327	90.7357
16549	Khsrp	10452228	2.3325	90.73
77652	Zfp422-rs1	10443940	2.33202	90.7243
71963	Cdca4	10402795	2.33195	90.7187
68490	Zfp579	10559702	2.33171	90.713
18611	Pea15a	10360227	2.33163	90.7073
338523	Jhdm1d	10544148	2.33128	90.7016
380912	Zfp395	10416004	2.33113	90.696
17128	Smad4	10459705	2.33065	90.6903
227195	Ino80d	10355069	2.33036	90.6846
77065	Ints7	10352735	2.33033	90.6789
219114	F630043A04Rik	10420426	2.32905	90.6733
66917	Chordc1	10583347	2.32902	90.6676
72787	Tmem48	10506680	2.32897	90.6619
67456	Ergic2	10549402	2.32845	90.6562
56462	Mtch1	10449581	2.32706	90.6505
100040259	LOC100040259	10590972	2.32676	90.6449
56422	Hbs1l	10363903	2.32673	90.6392
225228	EG225228	10463153	2.3261	90.6335
68059	Tm9sf2	10417147	2.32583	90.6278
381598	6820431F20Rik	10457223	2.32577	90.6222
14561	Gdf11	10373583	2.325	90.6165
109754	Cyb5r3	10430956	2.32347	90.6108
19014	Med1	10390595	2.32289	90.6051
667952	EG667952	10592847	2.32281	90.5995
18007	Neo1	10594110	2.32168	90.5938
11492	Adam19	10375402	2.32111	90.5881
20619	Snap23	10475199	2.32086	90.5824
13653	Egr1	10454782	2.32037	90.5767
21676	Tead1	10556442	2.31883	90.5711
65972	Ifi30	10579347	2.31847	90.5654
26398	Map2k4	10387014	2.31818	90.5597
12314	Calm2	10599461	2.31802	90.554
668990	EG668990	10603706	2.31724	90.5484
432864	EG432864	10420628	2.31698	90.5427
93687	Csnk1a1	10456120	2.31697	90.537
207615	Wdr37	10407513	2.31397	90.5313
14583	Gfpt1	10539773	2.3129	90.5257
13858	Eps15	10506939	2.3125	90.52
13682	Eif4a2	10434733	2.31116	90.5143
77975	Tmem50b	10440918	2.31072	90.5086
170826	Ppargc1b	10459193	2.31057	90.503
12035	Bcat1	10549222	2.31042	90.4973
68479	Phf5a	10430778	2.30918	90.4916
12301	Cacybp	10359334	2.3077	90.4859
630172	LOC630172	10507471	2.30765	90.4802
229285	Spg20	10492102	2.30736	90.4746
71994	Cnn3	10495659	2.30592	90.4689
66477	Usmg5	10572813	2.30565	90.4632
67956	Setd8	10525733	2.30522	90.4575
378702	Serf2	10504398	2.30518	90.4519
59021	Rab2a	10503150	2.3037	90.4462
19166	Psma2	10403706	2.30349	90.4405
269061	5730453I16Rik	10461475	2.30329	90.4348
76809	Bri3bp	10525887	2.30319	90.4292
217893	Pacs2	10398936	2.3031	90.4235
11993	Aup1	10539279	2.30127	90.4178
99683	Sec24b	10502165	2.30126	90.4121
11702	Amd1	10368670	2.30118	90.4064
408068	3830402I07Rik	10405916	2.30105	90.4008
59038	Pxmp4	10488797	2.30103	90.3951
16177	Il1r1	10345762	2.30072	90.3894
330695	Ctxn1	10576854	2.30046	90.3837
72519	Tmem55a	10503401	2.30028	90.3781
11826	Aqp1	10538459	2.29819	90.3724
12412	Cbx1	10380689	2.2978	90.3667
674507	LOC674507	10393058	2.29751	90.361
15364	Hmga2	10372796	2.29715	90.3554
19981	Rpl37a	10561138	2.29689	90.3497
67296	Socs4	10414350	2.29687	90.344
56195	Ptbp2	10501778	2.29593	90.3383
54124	Cks1b	10499639	2.29589	90.3327
320595	Phf8	10602474	2.29582	90.327
22282	Usf2	10562172	2.29544	90.3213
66361	Zfand1	10488029	2.29356	90.3156
20463	Cox7a2l	10453254	2.2934	90.3099
20322	Sord	10475437	2.29334	90.3043
229011	Samd10	10490724	2.29287	90.2986
629959	EG629959	10381807	2.29269	90.2929
58186	Rad18	10546834	2.29259	90.2872
100048378	LOC100048378	10424413	2.29207	90.2816
20630	Snrpc	10429081	2.29089	90.2759
121022	Mrps6	10436941	2.29049	90.2702
227707	BC005624	10558436	2.2904	90.2645
66491	Polr2l	10487267	2.28917	90.2589
66588	Cmpk1	10515164	2.28894	90.2532
229599	Gm129	10373452	2.28835	90.2475
216157	ORF61	10370690	2.28798	90.2418
14219	Ctgf	10362201	2.28738	90.2361
66423	2410022L05Rik	10577222	2.28688	90.2305
108954	Ppp1r15b	10357788	2.28571	90.2248
20909	Stx4a	10557793	2.28522	90.2191
14433	Gapdh	10368612	2.28497	90.2134
58520	0610007P14Rik	10401667	2.28487	90.2078
66521	Rwdd1	10368630	2.28436	90.2021
21454	Tcp1	10441797	2.28277	90.1964
56205	Ensa	10494299	2.28174	90.1907
23950	Dnajb6	10585533	2.28156	90.1851
225228	EG225228	10454099	2.28139	90.1794
21402	Skp1a	10375935	2.28066	90.1737
100038495	ENSMUSG00000072493	10429327	2.28059	90.168
56529	Sec11a	10565072	2.28024	90.1624
68770	Phtf2	10528238	2.27994	90.1567
15574	Hus1	10384322	2.27982	90.151
634019	EG634019	10466843	2.27932	90.1453
12632	Cfl2	10400350	2.27845	90.1396
72543	2610528K11Rik	10481845	2.27797	90.134
546723	EG546723	10441509	2.2771	90.1283
117198	Ivns1abp	10350594	2.27664	90.1226
104303	Arl1	10365637	2.2749	90.1169
13591	Ebf1	10375360	2.27407	90.1113
72993	Appl1	10418251	2.27401	90.1056
230936	Phf13	10518847	2.27397	90.0999
72102	Dusp11	10545897	2.27383	90.0942
67922	2510049I19Rik	10572779	2.27242	90.0886
66306	2810012G03Rik	10454735	2.27095	90.0829
64652	Nisch	10418578	2.27092	90.0772
28109	D10Wsu102e	10365297	2.26964	90.0715
75690	2210412E05Rik	10552425	2.26917	90.0658
19349	Rab7	10546092	2.26913	90.0602
11475	Acta2	10467124	2.2687	90.0545
109079	Sephs1	10469035	2.26804	90.0488
17698	Msn	10600836	2.26802	90.0431
100039281	ENSMUSG00000068706	10392930	2.26797	90.0375
26931	Ppp2r5c	10398459	2.26678	90.0318
52830	Pnrc2	10517421	2.26664	90.0261
14051	Eya4	10368243	2.26662	90.0204
102941	B630019K06Rik	10598562	2.26655	90.0148
27377	Yme1l1	10469732	2.26623	90.0091
15426	Hoxc8	10427290	2.26555	90.0034
17347	Mknk2	10370931	2.26533	89.9977
67333	Stk35	10476033	2.26522	89.9921
66308	2810021B07Rik	10403750	2.26435	89.9864
626316	OTTMUSG00000010173	10518346	2.26374	89.9807
217379	Ubxn2a	10404700	2.26309	89.975
12576	Cdkn1b	10542310	2.26259	89.9693
232334	Vgll4	10547009	2.26254	89.9637
68304	Kdelc2	10585338	2.26229	89.958
18793	Plaur	10550906	2.26227	89.9523
107746	Rapgef1	10470705	2.26201	89.9466
12393	Runx2	10451061	2.26193	89.941
69077	Psmd11	10379467	2.26177	89.9353
19672	Rcn1	10485645	2.26144	89.9296
11974	Atp6v0e	10443021	2.26048	89.9239
546723	EG546723	10594636	2.26047	89.9183
66197	Cks2	10424779	2.25986	89.9126
55979	Agpat1	10444420	2.25957	89.9069
53378	Sdcbp	10503134	2.25936	89.9012
98488	Gtf3c3	10354630	2.25689	89.8955
74754	Dhcr24	10506571	2.25686	89.8899
69612	2310037I24Rik	10554142	2.25617	89.8842
17448	Mdh2	10526381	2.25596	89.8785
71623	Krtap5-2	10569296	2.2552	89.8728
29876	Clic4	10517336	2.25493	89.8672
114893	Dcun1d1	10497765	2.25483	89.8615
791276	ENSMUSG00000066798	10482167	2.25471	89.8558
226971	Plekhb2	10345423	2.25399	89.8501
76857	Spopl	10480445	2.25354	89.8445
66537	Pomp	10527598	2.2533	89.8388
104369	Snora69	10604076	2.25306	89.8331
223527	Eny2	10423963	2.25276	89.8274
108083	Pip4k2b	10390473	2.25202	89.8218
13614	Edn1	10404783	2.25194	89.8161
170763	Zfp87	10410341	2.2514	89.8104
69053	1810013L24Rik	10433472	2.25096	89.8047
52009	Hn1l	10448803	2.25091	89.799
100042375	100042375	10352556	2.25086	89.7934
67738	Ppid	10492671	2.2507	89.7877
23950	Dnajb6	10354404	2.24899	89.782
80837	Rhoj	10396476	2.24881	89.7763
280411	Lix1l	10494445	2.24831	89.7707
11767	Ap1m1	10572786	2.24802	89.765
18141	Nup50	10425905	2.24738	89.7593
433845	ENSMUSG00000073212	10498405	2.24735	89.7536
21351	Taldo1	10558903	2.24668	89.748
67974	Ccny	10457385	2.24665	89.7423
68549	Sgol2	10346365	2.24648	89.7366
545622	Ptpn3	10513156	2.2457	89.7309
102032	AI316807	10577528	2.24559	89.7252
56428	Mtch2	10473737	2.2452	89.7196
20462	Sfrs10	10498185	2.24519	89.7139
53612	Vti1b	10401172	2.24496	89.7082
20163	Rsu1	10480145	2.24426	89.7025
13593	Ebf3	10568735	2.24416	89.6969
14828	Hspa5	10471586	2.24389	89.6912
59046	Arpp19	10587104	2.24385	89.6855
12176	Bnip3	10568785	2.24383	89.6798
67845	Rnf115	10494527	2.2434	89.6742
353170	4932441K18Rik	10607679	2.24233	89.6685
54393	Gabbr1	10445078	2.24206	89.6628
22210	Ube2b	10385761	2.24195	89.6571
68521	1110013L07Rik	10493421	2.24185	89.6515
66365	Ccdc90b	10554926	2.24171	89.6458
75423	Arl5a	10482687	2.24151	89.6401
64660	Mrps24	10383999	2.24116	89.6344
100036521	LOC100036521	10536390	2.24064	89.6287
26987	Eif4e2	10348180	2.24054	89.6231
434490	434490	10406203	2.24051	89.6174
226470	Zbtb41	10350377	2.23884	89.6117
234069	Pcid2	10577096	2.23857	89.606
21813	Tgfbr2	10597518	2.23844	89.6004
100038733	OTTMUSG00000015351	10487506	2.23843	89.5947
68481	Mpzl1	10359754	2.23804	89.589
330260	Pon2	10543004	2.23763	89.5833
23950	Dnajb6	10395976	2.23735	89.5777
11702	Amd1	10368748	2.23733	89.572
14057	Sfxn1	10405236	2.2372	89.5663
381511	Ppm2c	10511580	2.23717	89.5606
30059	Timm10	10473363	2.23592	89.555
639787	EG639787	10358754	2.23552	89.5493
108099	Prkag2	10528702	2.23503	89.5436
20639	Snrpb2	10476620	2.23461	89.5379
225791	Zadh2	10457054	2.23415	89.5322
20479	Vps4b	10357064	2.23371	89.5266
631204	LOC631204	10527528	2.23281	89.5209
57439	Tmem183a	10357917	2.23276	89.5152
18245	Oaz1	10364909	2.23234	89.5095
22628	Ywhag	10534531	2.23159	89.5039
232989	Hnrnpul1	10561085	2.23157	89.4982
432950	EG432950	10428441	2.23151	89.4925
11772	Ap2a2	10558971	2.23089	89.4868
18538	Pcna	10487930	2.23069	89.4812
66500	Slc30a7	10501593	2.22849	89.4755
226075	Glis3	10466888	2.228	89.4698
100017	Ldlrap1	10517301	2.2279	89.4641
66114	Dnajc30	10526274	2.22773	89.4584
69150	Snx4	10435226	2.2276	89.4528
235441	Usp3	10594613	2.22758	89.4471
17187	Max	10401128	2.22749	89.4414
19122	Prnp	10476314	2.22684	89.4357
19053	Ppp2cb	10571266	2.22626	89.4301
234776	Atmin	10575745	2.22551	89.4244
21672	Prdx2	10356999	2.22542	89.4187
56298	Arl6ip2	10453062	2.22449	89.413
66714	4921524J17Rik	10580365	2.22436	89.4074
56212	Rhog	10566132	2.22368	89.4017
66870	Serbp1	10538857	2.22353	89.396
227292	Ctdsp1	10347351	2.22312	89.3903
68114	Mum1	10364728	2.22308	89.3847
18214	Ddr2	10359929	2.22223	89.379
67003	Uqcrc2	10556940	2.22222	89.3733
226139	Cox15	10467859	2.22146	89.3676
12492	Scarb2	10531437	2.22103	89.3619
15422	Hoxc13	10427268	2.22068	89.3563
233490	Crebzf	10554895	2.22004	89.3506
22701	Zfp41	10424700	2.21998	89.3449
382450	EG382450	10361710	2.21968	89.3392
20747	Spop	10380534	2.21946	89.3336
268970	Arhgap28	10452613	2.21914	89.3279
78752	Csgalnact2	10547217	2.21886	89.3222
640703	EG640703	10548116	2.21868	89.3165
216742	Fnip1	10376144	2.21776	89.3109
80909	Gats	10526181	2.21743	89.3052
65113	Ndfip1	10455238	2.21739	89.2995
26554	Cul3	10356001	2.21706	89.2938
210126	Lpp	10434806	2.21661	89.2881
56422	Hbs1l	10362036	2.21574	89.2825
67453	Slc25a46	10457948	2.21513	89.2768
668275	EG668275	10366705	2.2147	89.2711
66256	Ssr2	10493259	2.2145	89.2654
621983	EG621983	10599205	2.21432	89.2598
71844	Nupl1	10420572	2.21432	89.2541
432508	Cpsf6	10372656	2.21273	89.2484
103694	Tmed4	10384138	2.21183	89.2427
68776	Taf11	10449394	2.21138	89.2371
54711	Plagl2	10488697	2.2109	89.2314
50789	Fbxl3	10422067	2.21085	89.2257
11946	Atp5a1	10456891	2.21077	89.22
19328	Rab12	10452556	2.21001	89.2144
625662	LOC625662	10406777	2.20965	89.2087
22750	Zfp9	10547282	2.20957	89.203
16593	Klc1	10398727	2.20927	89.1973
70612	5730494N06Rik	10487927	2.20909	89.1916
67739	4930570C03Rik	10426544	2.20904	89.186
72007	Fndc3b	10497548	2.20884	89.1803
192173	BC003940	10393814	2.20846	89.1746
66978	Luc7l	10442986	2.20844	89.1689
27362	Dnajb9	10400137	2.20844	89.1633
624367	EG624367	10414431	2.20804	89.1576
320717	Pptc7	10525374	2.20775	89.1519
67381	Med4	10416375	2.20569	89.1462
19727	Rfxank	10579181	2.20541	89.1406
108655	Foxp1	10546661	2.20447	89.1349
22661	Zfp148	10435237	2.20444	89.1292
20471	Six1	10400967	2.20415	89.1235
80385	Tusc2	10588678	2.20411	89.1178
231600	Chfr	10524105	2.20302	89.1122
231510	Agpat9	10523547	2.20177	89.1065
21856	Timm44	10576857	2.20149	89.1008
66645	Pspc1	10420338	2.20144	89.0951
16783	Lamp1	10570344	2.20108	89.0895
19219	Ptger4	10427461	2.20048	89.0838
68135	Eif3h	10428554	2.20038	89.0781
76453	Prss23	10565456	2.20001	89.0724
353187	Nr1d2	10417734	2.19993	89.0668
53869	Rab11a	10594480	2.1999	89.0611
74051	Steap2	10528008	2.19976	89.0554
106143	Cggbp1	10436471	2.19959	89.0497
230514	Leprot	10506298	2.19947	89.0441
217218	Atxn7l3	10391612	2.19946	89.0384
11468	Actg2	10545707	2.19933	89.0327
22343	Lin7c	10474411	2.19931	89.027
13244	Degs1	10360789	2.19904	89.0213
76246	Rtf1	10475000	2.19869	89.0157
217379	Ubxn2a	10399330	2.19825	89.01
68036	Zfp706	10428211	2.19807	89.0043
13030	Ctsb	10415844	2.19771	88.9986
668184	EG668184	10459802	2.19758	88.993
12616	Cenpb	10487871	2.19753	88.9873
15402	Hoxa5	10544768	2.19726	88.9816
77721	Mrps5	10475830	2.19699	88.9759
269378	Ahcy	10344713	2.19682	88.9703
60532	Wtap	10479268	2.19657	88.9646
16796	Lasp1	10380823	2.19657	88.9589
67916	Ppap2b	10506496	2.19611	88.9532
15275	Hk1	10369541	2.19591	88.9475
19128	Pros1	10436456	2.19584	88.9419
11848	Rhoa	10515493	2.19568	88.9362
75415	Arhgap12	10457250	2.19563	88.9305
12166	Bmpr1a	10418927	2.19521	88.9248
66146	Tmem57	10517312	2.19422	88.9192
69780	Smap2	10515994	2.19421	88.9135
623114	EG623114	10498307	2.19383	88.9078
12633	Cflar	10497931	2.19367	88.9021
79555	BC005537	10404178	2.19364	88.8965
68646	1110020G09Rik	10422962	2.19317	88.8908
18295	Ogn	10405063	2.19268	88.8851
67846	Tmem39a	10435714	2.19229	88.8794
101314	6720456B07Rik	10540785	2.19147	88.8738
98758	Hnrnpf	10407811	2.19121	88.8681
66684	Tceal8	10606858	2.19059	88.8624
192174	Rwdd4a	10571728	2.1903	88.8567
68183	Bcas2	10494910	2.19018	88.851
77134	Hnrnpa0	10409643	2.19005	88.8454
108682	Gpt2	10573626	2.19	88.8397
13486	Dr1	10523955	2.18808	88.834
268420	Alkbh5	10376685	2.18714	88.8283
18538	Pcna	10461391	2.18706	88.8227
67674	0610038D11Rik	10461012	2.18692	88.817
67241	Smc6	10394560	2.18687	88.8113
232157	Mobkl1b	10539421	2.18685	88.8056
100072	Camta1	10518837	2.18679	88.8
65114	Vps35	10580331	2.18655	88.7943
67039	Rbm25	10397081	2.18628	88.7886
11702	Amd1	10512935	2.18562	88.7829
30878	Apln	10604375	2.18545	88.7772
22038	Plscr1	10587792	2.18491	88.7716
16423	Cd47	10436182	2.18482	88.7659
225659	Cep76	10459576	2.18374	88.7602
53375	Mtx2	10472994	2.1831	88.7545
13393	Dlx3	10380501	2.18184	88.7489
76709	Arpc2	10347297	2.18184	88.7432
19211	Pten	10462521	2.18183	88.7375
71461	Ptk7	10451372	2.18164	88.7318
17425	Foxk1	10527101	2.18093	88.7262
18786	Plaa	10514405	2.18017	88.7205
17718	ND3	10598055	2.17944	88.7148
66235	Eif1ay	10602795	2.17714	88.7091
26941	Slc9a3r1	10382462	2.17688	88.7035
225010	Lycat	10446771	2.1761	88.6978
666585	LOC666585	10603254	2.17608	88.6921
12402	Cbl	10592734	2.17497	88.6864
58996	4933428G20Rik	10380773	2.17438	88.6807
16948	Lox	10458894	2.1741	88.6751
231464	Cnot6l	10531529	2.17354	88.6694
26409	Map3k7	10503680	2.17243	88.6637
[truncated: 15,618 more rows]
