# Supplementary material for: Systematic Analysis of Cis-Elements in Unstable mRNAs Demonstrates that CUGBP1 Is a Key Regulator of mRNA Decay in Muscle Cells
Source: PLoS One. 2010 Jun 21;5(6):e11201. doi: 10.1371/journal.pone.0011201 (PMC2888570; doi:10.1371/journal.pone.0011201)
Supplement: Table S1 — Hexamer scores for half life and RIP-Chip analyses. For the half life analysis, association of each hexamer with short and long half life mRNAs was assessed and a score derived using the equation Significance Score = −log(P-value)*s, where P value was based on Fisher's exact test and s = 1 if the hexamer is over-represented in long half life mRNAs or −1 if it is over-represented in short half life mRNAs. For the RIP-Chip analysis, the occurrence of each hexamer within the set of mRNAs immunoprecipitated with CUGBP1 was assessed. The value shown is −log(P-value) where P-value was based on Fisher's exact test. (0.57 MB XLS) [file pone.0011201.s006.xls]

## Sheet: TableS1
Table S1. Hexamer scores for half life and RIP-Chip analyses.
	Half life experiments					RIP-Chip
Hexamer	C2C12	ES/LIF+	ES/LIF-	ES/RA+
UUUUUU	-26.9297	-3.11146	-12.7072	-4.87546		115.074
UUUUUG	-10.2852	-8.31696	-14.0925	-9.67062		39.0064
UUUUUC	-1.63242	-4.40256	-9.9056	-4.50559		14.5501
UUUUUA	-11.9565	-5.7708	-18.3901	-7.68077		12.4341
UUUUGU	-10.5048	-10.0065	-17.8759	-15.9385		97.3778
UUUUGG	-2.14192	-0.339095	-1.86416	-2.26274		6.24003
UUUUGC	-1.15512	-3.63083	-3.74107	-1.3642		2.02971
UUUUGA	-1.88752	-4.04961	-9.09416	-6.16609		4.99187
UUUUCU	-0.997057	-2.45104	-5.4559	-4.4862		9.23994
UUUUCG	-0.745532	0.0810967	-0.734915	-0.126518		2.59387
UUUUCC	-0.174861	-2.39695	-3.53981	-0.310786		4.03264
UUUUCA	-1.00458	-1.55916	-5.76453	-3.48846		4.98847
UUUUAU	-5.18788	-9.14204	-14.1848	-7.47329		2.30388
UUUUAG	-1.42814	-1.22469	-3.4978	-2.25463		7.86704
UUUUAC	-1.93514	-1.7475	-2.74661	-0.766523		2.82152
UUUUAA	-4.43415	-8.00268	-21.7258	-4.8257		7.46376
UUUGUU	-14.295	-11.246	-25.0795	-16.4826		141.746
UUUGUG	-1.09278	-1.94763	-1.82971	-6.05042		15.6877
UUUGUC	-0.0603899	-0.84181	-1.01942	-1.14216		12.6135
UUUGUA	-4.61866	-6.80324	-12.0761	-5.60576		13.8222
UUUGGU	-3.149	-1.57644	-3.99823	-1.5639		6.71829
UUUGGG	-2.86075	-0.244692	-0.262588	-0.94152		2.08549
UUUGGC	-0.736047	-0.600055	0.176301	-0.275681		0.503777
UUUGGA	-0.488915	-0.602764	-0.816731	-0.201824		1.21562
UUUGCU	-1.124	-2.33638	-2.98486	-1.0728		3.06201
UUUGCG	-0.722514	-0.195923	0.0964441	0.256186		0.746912
UUUGCC	0.664637	-1.06231	-0.260102	-0.118423		0.174594
UUUGCA	-0.431304	-2.13918	-4.41466	-2.08984		2.65254
UUUGAU	-1.09078	-3.38865	-4.68635	-3.14242		4.24735
UUUGAG	-4.07411	-2.06604	-3.51537	-3.0891		2.86429
UUUGAC	-0.090022	-0.770984	-2.57366	-1.0753		1.5992
UUUGAA	-0.372281	-5.70463	-6.78298	-2.93983		3.3916
UUUCUU	-0.562977	-6.56205	-7.3225	-4.53192		12.9399
UUUCUG	-0.0899029	-1.18193	-4.20345	-0.808866		4.39222
UUUCUC	-0.0982913	-0.363938	-0.778355	0.252714		2.8992
UUUCUA	-0.55791	-1.8538	-4.1551	-2.28309		1.47908
UUUCGU	-0.24136	-1.03842	-0.27054	-1.09102		5.83901
UUUCGG	-0.463228	0.0454448	-0.521234	0.691614		0.415765
UUUCGC	0.240187	-0.551019	0.173871	-0.253236		1.20591
UUUCGA	0	-0.161352	-0.431743	-0.0435999		0.494129
UUUCCU	0.907555	-1.0719	-2.91782	-1.22072		3.25628
UUUCCG	0	-0.0405087	0.139195	0.169118		0.244417
UUUCCC	-0.193561	0	0.0738742	0.0272409		2.00993
UUUCCA	0.65319	-0.918916	-2.06137	-0.352319		0.871142
UUUCAU	-0.0247863	-0.26299	-2.65672	-1.63944		2.84337
UUUCAG	-0.905866	-1.94613	-1.43894	-0.740146		1.08871
UUUCAC	0.875862	-0.640021	-1.00444	-0.598763		0.54964
UUUCAA	-0.232829	-2.20688	-6.2481	-4.36431		0.571905
UUUAUU	-5.42163	-9.45002	-17.579	-10.3913		3.1254
UUUAUG	-1.74806	-4.71606	-6.37794	-3.87157		2.52343
UUUAUC	-0.475117	-2.29607	-1.88743	-2.03273		0.228758
UUUAUA	-3.05375	-8.98675	-13.0079	-13.9884		0.959637
UUUAGU	-0.578662	-0.213888	-2.719	-0.418151		4.41328
UUUAGG	-0.316099	0.411156	-0.039174	-0.127151		4.83065
UUUAGC	-0.923918	-1.16091	-0.297434	-0.432779		0.114564
UUUAGA	-1.15322	-1.10205	-5.43759	-1.97554		3.24017
UUUACU	-0.0435415	-1.3749	-3.31353	-1.00588		2.55219
UUUACG	0	-0.228546	0.0950169	0.0455054		0.551112
UUUACC	-0.210906	0.105661	-0.447442	-0.927936		0.428989
UUUACA	-1.29448	-1.81752	-3.04262	-2.67621		1.24641
UUUAAU	-4.74585	-2.26848	-8.41598	-3.66081		2.53782
UUUAAG	-0.18759	-3.48594	-5.63098	-1.40338		3.95547
UUUAAC	-1.15605	-1.39081	-4.51235	-0.551538		1.44286
UUUAAA	-3.6054	-11.0895	-27.2774	-8.79828		7.49727
UUGUUU	-14.7955	-10.4523	-26.7546	-13.3738		136.707
UUGUUG	-1.19808	-4.54456	-3.48934	-1.42485		38.8128
UUGUUC	0.061158	-0.978539	-1.0471	-0.540607		3.57062
UUGUUA	-2.72117	-2.82372	-9.65282	-7.74179		5.38402
UUGUGU	-1.7594	-3.56509	-3.83921	-5.39942		19.3469
UUGUGG	-0.47992	-0.865434	-0.0833725	-0.88792		1.573
UUGUGC	-0.0163978	0.135949	0.0362583	-0.305169		3.83387
UUGUGA	-1.70129	-2.26253	-2.72258	-6.91314		4.7177
UUGUCU	-1.19418	-1.05773	-1.30962	-0.621661		21.516
UUGUCG	-0.968176	-1.1624	-0.282085	-0.622039		3.67241
UUGUCC	0.172315	2.12693	1.55655	1.10993		0.74355
UUGUCA	-0.598673	-1.0611	-0.433178	-1.15363		2.91146
UUGUAU	-3.84933	-9.61723	-7.69359	-5.92671		8.93326
UUGUAG	-1.00159	-0.182884	-2.22432	-0.72749		5.84063
UUGUAC	-3.43308	-3.21585	-4.42739	-3.65414		6.37582
UUGUAA	-3.3644	-8.6339	-11.161	-8.84238		7.97465
UUGGUU	-3.62324	-2.35115	-4.50377	-4.82858		8.29717
UUGGUG	-0.903872	0.264155	-0.0341663	0.49589		2.42848
UUGGUC	-0.0196625	0.0207033	-0.268227	0.0202663		0.36048
UUGGUA	-3.64754	-0.715405	-2.32305	-0.71806		1.75308
UUGGGU	-0.0838828	0.226956	0.177087	-0.149143		3.94288
UUGGGG	-1.61307	0.543608	0.837088	0.460689		0.683039
UUGGGC	-0.179285	1.7107	1.83293	1.16661		0.0239806
UUGGGA	-0.482323	0.0678168	0.603312	-0.101116		0.215549
UUGGCU	-3.50738	0.309552	-0.0808917	0.0460115		0.520793
UUGGCG	-0.0882623	-0.089638	-0.41972	-0.414868		0.722828
UUGGCC	0.0361977	0	1.59958	1.32221		0.0494131
UUGGCA	0.0888001	-0.387229	-0.775353	-0.423759		0.0581787
UUGGAU	-0.621395	-0.673404	-2.11264	-0.0193204		1.82763
UUGGAG	-0.065431	0.62701	0.883464	0.497054		0.0637283
UUGGAC	-1.55684	0.230169	0.272351	0.243909		0.261133
UUGGAA	-3.09036	-1.23685	-1.80727	-2.23537		0.955632
UUGCUU	-3.02023	-1.59491	-4.44693	-1.38291		8.06825
UUGCUG	-0.654814	-0.859893	-0.317533	-0.257376		0.446553
UUGCUC	1.08196	0.263611	0.819952	0.935333		0.521815
UUGCUA	0.0750841	-0.689138	-1.7814	0.0188752		0.466343
UUGCGU	-0.703203	0.0960844	0.04682	0.418859		1.54541
UUGCGG	-0.35582	-0.0485922	0	-0.151762		0.323739
UUGCGC	-0.632993	-1.05415	-0.537267	0		0.287043
UUGCGA	-0.266345	-1.42517	0.124688	0.33744		1.03136
UUGCCU	0.567807	1.13506	0.414515	0.55306		0.257105
UUGCCG	0.136921	-1.12679	0	-0.512062		0.403715
UUGCCC	0.576679	0.913512	1.59506	0.743816		0.473204
UUGCCA	-0.598603	-0.461431	0.489992	0.348092		1.08001
UUGCAU	-0.712862	-1.26375	-4.01322	-2.39399		1.47931
UUGCAG	-0.844458	-0.153432	-0.352998	-0.757273		0.582356
UUGCAC	-1.30011	-1.24068	-0.449624	0.0427542		0.446067
UUGCAA	0.772634	-1.88035	-1.54003	-1.68288		0.235894
UUGAUU	-0.0626376	-1.40469	-2.09652	-1.44859		3.47513
UUGAUG	-2.77519	-1.08318	-1.66685	-1.83917		2.21085
UUGAUC	1.46653	-0.241169	-0.457152	0.0715382		0.117535
UUGAUA	-0.861263	-1.74806	-5.58023	-2.09169		2.21667
UUGAGU	-0.875786	-2.29229	-3.19446	-2.88878		0.435092
UUGAGG	-1.2796	-0.806818	0	-0.330917		0.740787
UUGAGC	-0.430064	0	0	0.201674		0.518116
UUGAGA	-1.87219	-0.465512	-1.19473	-1.12661		3.27755
UUGACU	0	0.0348874	-1.30347	-0.687171		0.373455
UUGACG	0.0587226	0.0665574	0	0.457691		0.736049
UUGACC	-0.410959	-0.380304	-0.457064	-0.626039		3.36231
UUGACA	0.114476	-0.688812	-1.64574	-0.612881		1.27596
UUGAAU	-0.718497	-3.32538	-7.34875	-4.61322		1.29321
UUGAAG	-0.897906	-3.36259	-1.32888	-1.99357		1.25757
UUGAAC	-1.99832	-1.21346	-2.60799	-2.5298		1.08518
UUGAAA	-1.70702	-3.71859	-8.00629	-1.53904		3.8881
UUCUUU	0.190822	-3.88938	-6.05216	-3.53084		11.2386
UUCUUG	0.291198	-0.34944	-0.995709	-0.7794		0.364684
UUCUUC	1.78116	-1.38023	1.92568	0.682515		0.0702041
UUCUUA	0.269785	-3.34177	-4.61166	-3.8741		1.18761
UUCUGU	-0.836765	-0.843913	-2.50011	-0.754913		9.13815
UUCUGG	0.460472	1.15612	-0.102922	0.576022		0.0343742
UUCUGC	-0.18061	0.227716	0.724102	-0.205727		0.172229
UUCUGA	0.317925	-0.383902	-0.880256	-0.571945		0.304639
UUCUCU	1.68207	-0.13001	0.0116442	0.414921		0.748543
UUCUCG	0.885575	0.399817	0.336079	-0.1231		1.39209
UUCUCC	-0.0276576	0.555967	0.602812	2.46806		0.419412
UUCUCA	0	-0.285148	0.514768	1.11325		0.440808
UUCUAU	1.13109	-0.665035	-3.76237	-0.838477		1.3559
UUCUAG	-0.12059	-0.0533655	-1.6191	-0.61122		0.328373
UUCUAC	-0.891929	-0.266538	-0.166521	0.133768		0.234486
UUCUAA	0.221479	-2.85574	-0.830223	-3.10139		0.30769
UUCGUU	-0.431234	-1.51417	-0.40255	-0.335537		7.95483
UUCGUG	-0.483084	-0.460008	-1.48029	-0.511041		1.16592
UUCGUC	-1.37866	0.669989	0.0964441	0.227522		0.75886
UUCGUA	0.225758	-0.223307	0.0557659	-0.16529		1.61682
UUCGGU	-0.0817151	-1.10904	-1.37509	-0.256009		0.651576
UUCGGG	-0.716146	-1.27214	-0.595585	-0.0850834		0.740819
UUCGGC	-0.571624	-0.749849	0.639825	-0.277347		0.821081
UUCGGA	1.02403	0.910427	0.391979	0.0521146		0.0374881
UUCGCU	0.165519	-0.877561	-1.03543	0		0.244829
UUCGCG	0.318602	0.114049	1.14297	1.10971		0.53505
UUCGCC	0.305707	0	0	-0.770293		0.760833
UUCGCA	0.117779	-0.228546	0.586078	-0.717435		0.909534
UUCGAU	0.440937	-0.895499	-0.717939	-0.269302		0.600712
UUCGAG	-2.25502	-0.493042	-0.537676	-0.469588		0.103407
UUCGAC	0.217267	0.0685497	0	0		0.118459
UUCGAA	0.402093	-0.049554	0.2334	0.0962539		0.555827
UUCCUU	0.368644	-0.853588	-1.02376	0.104897		2.82435
UUCCUG	0.138777	0.52618	0.844272	0.793426		0.246176
UUCCUC	2.49224	1.48459	0.583664	3.99905		0.29157
UUCCUA	0.555008	-0.669642	-0.294701	-1.09346		0.476052
UUCCGU	-0.724527	-0.0321636	-0.195685	0.189168		0.969181
UUCCGG	0.737704	-0.253307	0	0.337694		0.240615
UUCCGC	0.617538	0	2.17993	0.80244		0.192517
UUCCGA	0.0847653	0.0827165	-0.333515	0.184478		0.0979681
UUCCCU	0.0518777	1.51989	5.62819	5.01462		3.16845
UUCCCG	-0.103779	0.639718	0.881629	0.263791		0.198559
UUCCCC	1.03091	1.94873	3.70713	3.17834		0.980114
UUCCCA	2.18059	2.19436	1.80198	0.764332		0.0212929
UUCCAU	0.496507	0.208717	-0.73036	-0.203958		1.19801
UUCCAG	1.14105	1.55777	4.77955	2.87074		0.0318132
UUCCAC	0.428771	-0.0376546	0.246141	0.501642		0.0473112
UUCCAA	0.235221	-1.74326	-0.677787	-0.515847		0.80509
UUCAUU	0.124991	-2.07716	-2.60496	-1.37633		2.887
UUCAUG	0.348392	-1.13199	-1.4552	-1.36624		1.20429
UUCAUC	1.2495	0	0.0602057	0.17136		0.707011
UUCAUA	-0.605765	-1.95416	-3.99024	-2.91263		0.0610251
UUCAGU	-2.34438	-5.51443	-4.94697	-5.99138		1.64309
UUCAGG	0.29384	0.477147	0.439599	0.104411		0.0986977
UUCAGC	-0.152194	0.325536	0.194367	0.461027		0.112269
UUCAGA	-0.348286	-1.53378	-1.61893	-0.485693		0.411092
UUCACU	0.163186	0.538626	-0.341118	0.937974		0.763517
UUCACG	0.112219	0.172086	0.42051	0		0.279198
UUCACC	0.801685	1.25838	0.547439	2.74143		0.0345302
UUCACA	0.497772	-1.94062	-0.524741	-0.329565		0.668179
UUCAAU	0.349882	-0.759563	-2.50549	-1.94887		0.92421
UUCAAG	1.60703	0	-0.158424	-1.21596		0.409047
UUCAAC	0.0676581	-0.0222884	0.59982	-0.940971		0.169497
UUCAAA	0.42303	-3.6061	-6.79796	-3.61043		0.0155693
UUAUUU	-2.15859	-9.90009	-16.8419	-10.308		5.17542
UUAUUG	-1.32303	-3.19547	-5.60238	-4.98772		4.45524
UUAUUC	0.800388	0.332889	-0.486828	-0.462576		0.0320308
UUAUUA	-0.67777	-5.49154	-6.84423	-5.04261		1.14232
UUAUGU	-0.914803	-2.89491	-4.67599	-2.45547		7.00277
UUAUGG	-0.0657824	-0.320944	-0.174203	-0.0903996		0.155379
UUAUGC	-0.234081	-0.955585	-2.04345	-0.609675		0.932428
UUAUGA	-0.424693	-0.733988	-4.25144	-3.16077		0.353499
UUAUCU	0.400827	-0.442115	-2.29594	-0.612263		0.362277
UUAUCG	0.49298	-1.42247	0.280182	0		0.182736
UUAUCC	0	-0.889511	-1.13681	-0.946622		0.270957
UUAUCA	-0.0588954	-2.54108	-2.1668	-1.35809		0.446977
UUAUAU	-1.73963	-8.15875	-16.5181	-9.50062		0.929638
UUAUAG	0.790651	-3.47218	-5.51141	-3.88582		0.128219
UUAUAC	-0.43166	-5.27398	-4.94761	-4.8257		0.492912
UUAUAA	-0.41663	-2.57781	-6.40237	-2.84109		0.615623
UUAGUU	-0.667216	-1.83553	-5.68259	-2.82694		6.33924
UUAGUG	-0.26509	0.0864439	-1.17831	-0.0598609		1.86932
UUAGUC	-0.213438	0.135089	0	0.303525		0.100308
UUAGUA	0.460301	-1.47219	-5.64793	-0.917426		1.19544
UUAGGU	-0.397688	0.805299	-0.721001	0.0233223		1.08045
UUAGGG	0.0425422	1.35122	1.08191	1.07556		1.51662
UUAGGC	-0.71285	0.559601	1.02996	0.448175		0.628694
UUAGGA	0	-0.174893	-0.781807	0.0821196		0.983138
UUAGCU	0	-0.659104	-0.335059	-0.445809		0.0330034
UUAGCG	-1.14144	-0.108671	0.110899	-0.42105		0.0393546
UUAGCC	-0.0216337	0.874244	0.09994	1.74295		0.610288
UUAGCA	0.270349	-0.520599	-0.969047	-0.631508		0.0666651
UUAGAU	0.20364	-0.675713	-2.82539	-0.502029		1.22497
UUAGAG	0.393272	0.254796	-0.144755	-0.280781		0.432881
UUAGAC	-0.0448033	-0.235597	-0.740464	-0.681583		1.07547
UUAGAA	-0.878691	-2.90025	-5.22874	-2.80283		0.943311
UUACUU	-0.282883	-3.70467	-7.8078	-2.01797		1.20893
UUACUG	0.0310051	0.131591	-0.84698	0.439112		3.1501
UUACUC	-0.214771	-0.863108	-0.432773	-0.182074		0.801672
UUACUA	-0.214771	-1.59581	-2.60816	-2.28943		1.60476
UUACGU	-0.326521	-1.02296	-1.57269	-0.542003		0.545842
UUACGG	0.380496	0.666795	0.100662	-0.154711		0.76758
UUACGC	-0.130513	0	0	0.416925		0.177253
UUACGA	-0.112387	-1.09837	0.0581155	-0.278102		0.107686
UUACCU	0.331896	-1.61042	-1.25563	-0.798747		1.10935
UUACCG	-0.345795	-0.264242	-0.0537041	0.174179		0.53976
UUACCC	0	3.27044	0.328022	1.47942		0.151334
UUACCA	0.651912	-0.470967	-0.062565	-0.20369		1.0779
UUACAU	-0.211557	-1.6337	-5.47305	-3.91523		1.23659
UUACAG	-1.36588	-2.41332	-2.24437	-3.86102		2.8871
UUACAC	-0.603897	-0.398399	-0.506078	-0.143163		0.104528
UUACAA	1.29395	-1.85121	-1.5458	-2.12063		0.624341
UUAAUU	-2.92838	-3.81945	-7.43346	-4.02624		3.74559
UUAAUG	-0.908807	-0.705679	-3.55125	-1.95148		1.21219
UUAAUC	-0.209469	-0.153766	-0.737069	0.308028		0.197172
UUAAUA	-2.1572	-1.30387	-3.67226	-2.47782		0.908432
UUAAGU	-2.24954	-3.68602	-7.3962	-2.07724		3.81176
UUAAGG	-0.737042	-2.80377	-1.49846	-1.45152		1.47744
UUAAGC	0.0417414	-0.0956932	-2.22042	-1.34986		0.46989
UUAAGA	0.239881	-4.54421	-3.52605	-0.424867		0.580807
UUAACU	-0.397653	0.113284	-2.31758	-0.298506		0.684908
UUAACG	-0.196167	-0.572884	-0.0423448	-0.205816		0.769574
UUAACC	-0.457964	-0.131126	-0.609497	-0.228084		0.874544
UUAACA	0	-4.24065	-4.98597	-1.03246		2.20228
UUAAAU	-1.10744	-7.13984	-16.5219	-6.76047		1.17728
UUAAAG	-4.72593	-0.54065	-5.19447	-1.96501		3.7097
UUAAAC	-0.819166	-1.05414	-2.63481	-1.05336		1.49678
UUAAAA	-0.807874	-10.4791	-15.0151	-6.54025		2.92625
UGUUUU	-6.80096	-8.89109	-16.1662	-10.6736		69.8762
UGUUUG	-5.92458	-5.89297	-7.23406	-3.71142		74.9609
UGUUUC	-0.581151	-2.11219	-4.29588	-1.9594		1.79794
UGUUUA	-3.76807	-2.18132	-7.89654	-6.45051		8.79747
UGUUGU	-0.459676	-1.85251	-3.33023	-1.28513		34.9867
UGUUGG	-1.14816	-0.619413	-0.341891	-0.325166		4.05197
UGUUGC	-1.22102	-1.47926	-0.739831	-0.635923		2.17875
UGUUGA	-1.68712	-3.67901	-1.81191	-2.7721		5.57518
UGUUCU	0.386227	-0.0254657	-2.32749	-0.189081		3.41975
UGUUCG	0.135074	-0.0896516	-1.26905	0		3.623
UGUUCC	1.77276	0.877955	1.23399	2.26521		0.27108
UGUUCA	-0.178042	0.176581	-0.0153079	-1.23053		1.39793
UGUUAU	-0.187903	-0.931133	-8.51899	-3.80918		6.60429
UGUUAG	0.0522721	0.126833	-0.72799	-1.023		0.177886
UGUUAC	-0.138969	-0.597278	-0.687691	-0.0611121		5.88425
UGUUAA	-1.55143	-2.44282	-6.40237	-3.5488		2.11394
UGUGUU	0.0213229	-3.6692	-3.21202	-3.18187		17.43
UGUGUG	-5.63088	0.725152	-0.464438	-3.96386		102.638
UGUGUC	-0.0859835	0.399282	-0.429558	-0.0872855		2.20263
UGUGUA	-2.15332	-2.45382	-4.39267	-6.42906		18.8212
UGUGGU	-0.900691	-0.281186	0.0434325	-0.404499		1.718
UGUGGG	-0.05605	7.18999	7.24259	2.45526		0.611248
UGUGGC	-0.0444479	1.0394	1.07721	-0.147893		0.185027
UGUGGA	-0.70671	0.434119	0.38249	0.337948		0.287857
UGUGCU	-0.496195	0	1.24778	-0.111389		5.50012
UGUGCG	-0.209159	-0.169761	0	-0.620113		4.30214
UGUGCC	-0.095221	1.21879	3.01804	2.60695		0.970907
UGUGCA	-0.962357	-0.0286364	-0.878051	-0.158843		0.273689
UGUGAU	-0.576204	-0.801971	-1.1739	-1.31538		3.91328
UGUGAG	-0.264755	0.164135	-0.142978	0.0430911		1.50633
UGUGAC	0.188774	0.562915	0.76436	-0.218726		0.571695
UGUGAA	-4.34826	-2.2037	-3.67124	-6.28714		1.74132
UGUCUU	-3.60638	-1.34959	-2.99855	-0.868692		9.80341
UGUCUG	-1.95085	0.296326	-0.241522	-0.163239		22.4473
UGUCUC	0.524499	3.08109	2.74379	3.03961		3.49238
UGUCUA	0.869916	-1.82629	-1.02953	-0.299347		1.28175
UGUCGU	-0.147066	-0.711825	-0.116663	-0.605091		6.01927
UGUCGG	-2.4452	0	0.49553	-0.134259		0.228096
UGUCGC	-1.28313	-0.759556	-0.687808	-0.818399		0.661327
UGUCGA	0	-2.35084	-0.27474	-0.710632		1.33807
UGUCCU	-0.822139	1.51965	2.69107	2.39574		2.22643
UGUCCG	-0.132879	0.425571	0.241097	0.287812		2.94612
UGUCCC	1.71778	6.53506	6.37108	1.29415		2.6244
UGUCCA	1.03245	1.64586	2.97874	1.61612		0.0177502
UGUCAU	-0.0466489	-0.734322	-0.78853	-0.266518		3.03307
UGUCAG	-0.796626	0.0306655	-0.155369	0.0146207		0.724683
UGUCAC	-0.106122	0.822978	1.15703	0.928057		0.106251
UGUCAA	-0.231209	-0.926542	-1.10015	-2.28353		1.4502
UGUAUU	-1.37235	-9.13283	-10.2848	-5.53392		7.62215
UGUAUG	-0.569132	-0.928484	-2.19965	-1.78212		7.40331
UGUAUC	0	-1.10204	-2.82207	-2.51244		1.10947
UGUAUA	-5.84921	-8.63468	-16.6804	-8.77618		4.15372
UGUAGU	-0.660431	0	-5.61265	-0.440504		3.17005
UGUAGG	1.42661	1.2848	0.0612609	0.346788		1.02165
UGUAGC	-1.37125	0.0360696	-0.119316	-0.13863		3.14897
UGUAGA	0.0801559	0	-1.38648	-0.714661		5.56676
UGUACU	-0.443211	-0.968784	-0.793941	-0.645465		1.24502
UGUACG	0	-0.263888	-0.940901	-0.239154		2.04678
UGUACC	-0.8414	0	0.343911	0.40584		0.612755
UGUACA	-3.07577	-7.6855	-10.4095	-7.2141		2.24802
UGUAAU	-1.9739	-3.22661	-4.66656	-3.8145		4.28594
UGUAAG	-1.09429	-1.36666	-0.757233	-2.35157		1.87563
UGUAAC	0.0922207	-1.40419	-2.03581	-1.0739		3.34637
UGUAAA	-4.30259	-16.9758	-14.0446	-13.1146		3.00048
UGGUUU	-2.62638	-2.19459	-4.64082	-3.48143		8.41196
UGGUUG	-2.05018	-0.111684	-0.442619	-0.694026		1.19882
UGGUUC	0.214439	-0.361663	0.144445	-0.0349851		0.333945
UGGUUA	-0.30834	-0.243426	-1.19499	-0.239564		4.68948
UGGUGU	-0.493191	-0.257588	-0.626246	0		2.47379
UGGUGG	0.0138001	0.413703	2.69256	0.853125		0.0602706
UGGUGC	-2.75652	0.0735232	1.04373	0.155964		0.0803877
UGGUGA	0.410417	-0.0513077	0.197974	0.847693		0.225501
UGGUCU	-0.0814212	0.125874	1.14178	1.27186		0.518755
UGGUCG	-0.372991	0.105434	-0.175332	0.0933246		0.21458
UGGUCC	0.745983	4.31369	3.16147	3.38249		0.0415078
UGGUCA	-1.63448	-0.207222	0	0.0532824		0.418065
UGGUAU	0.195827	-0.252658	-0.0896827	-0.397091		0.265797
UGGUAG	-0.201554	0	-0.254338	-0.0420219		2.15907
UGGUAC	-1.10193	0	0	-0.181203		0.0652146
UGGUAA	-3.18195	-0.799387	-1.57646	-0.849237		1.41397
UGGGUU	-1.93692	-0.100219	-0.181444	-0.33241		1.99989
UGGGUG	0.465112	3.17524	2.79131	1.05486		1.53975
UGGGUC	0.542421	3.34839	2.89801	3.19359		0.268527
UGGGUA	0.275944	0.0635206	0.520048	-0.376108		0.767033
UGGGGU	0.0945465	1.63304	3.87899	1.28858		0.259453
UGGGGG	-0.013453	5.25161	5.66148	1.35339		0.0186284
UGGGGC	-0.383257	12.089	15.0288	8.4777		9.78e-05
UGGGGA	-1.42667	1.69792	6.23618	3.63598		0.0794421
UGGGCU	0.140599	6.65388	9.36858	6.11313		0.0145016
UGGGCG	-0.123541	0.703933	1.08276	0.903664		0.123848
UGGGCC	0.346598	8.39972	9.59683	6.10069		0.00124448
UGGGCA	0.170024	1.59213	1.71639	0.387486		2.54e-05
UGGGAU	-0.0972708	0.753349	0.920709	0.539128		0.0266435
UGGGAG	-0.452336	3.30856	2.78452	1.13779		0.06574
UGGGAC	0.710784	2.81118	2.78971	5.73317		0.162498
UGGGAA	-0.658826	-0.057077	1.28569	0.0986084		0.00839058
UGGCUU	-0.094834	1.21681	0.137103	0.182249		1.10945
UGGCUG	-0.31445	5.2561	7.44723	3.3563		0.2261
UGGCUC	-0.0445263	1.39921	1.84688	2.05884		0.0318689
UGGCUA	-0.501979	0.107444	-1.23996	-0.670021		0.0552387
UGGCGU	-0.310849	-0.264868	-0.037962	-0.605091		0.446976
UGGCGG	0	-0.211194	0.73351	0.306994		0.0340661
UGGCGC	-0.0897643	0.822363	0.81653	-0.296094		0.383086
UGGCGA	0.038189	0.143809	0.190637	-0.0404292		0.0612738
UGGCCU	-0.30124	1.80642	6.04032	3.45442		0.00747388
UGGCCG	-1.18761	0.489522	1.37461	1.24557		0.128428
UGGCCC	0.982636	5.03045	6.55851	7.5997		0.000170682
UGGCCA	0.584727	3.27043	5.43607	3.6609		0.0795152
UGGCAU	0.291401	-0.329537	-0.698379	-0.450232		0.0500659
UGGCAG	0.572605	0.632655	1.71639	1.53346		0.0179239
UGGCAC	0.255816	0.151189	0.336705	-0.0743241		0.0568279
UGGCAA	-0.302582	-0.285842	-0.124261	-1.09754		0.000300189
UGGAUU	-1.71419	-0.633565	-1.88576	-1.41714		2.53209
UGGAUG	0.483864	0.355153	-0.651552	0.103749		0.188272
UGGAUC	-0.3538	-2.43312	0.0978706	-0.043009		0.336669
UGGAUA	0.382033	-0.454188	0	-0.245579		0.00355773
UGGAGU	-0.963781	0.867539	0.381781	0.266166		0.0940057
UGGAGG	0.204797	4.40573	3.16538	5.52604		0.000414183
UGGAGC	-0.163482	2.92738	5.22835	2.73474		0.000794515
UGGAGA	0.280818	0.961028	0.650935	-0.223662		6.11e-05
UGGACU	-3.66041	0.262269	0.133477	0.416839		0.107919
UGGACG	-0.878373	-0.625415	-0.779493	-0.442286		0.46131
UGGACC	0	2.79582	3.48384	2.27619		0.00606914
UGGACA	-0.0502558	1.20494	1.09918	1.34907		4.18e-05
UGGAAU	-0.419986	-0.923925	-3.92327	-3.79587		0.0406395
UGGAAG	-0.635139	-0.331596	-0.0429698	0.344562		0.220642
UGGAAC	-0.42859	-0.141791	0.724869	-0.0359472		0.0726928
UGGAAA	0.0251144	-0.792185	-1.70687	-1.51786		0.0759344
UGCUUU	-1.29405	-1.69879	-6.16807	-0.554236		7.20646
UGCUUG	-0.164292	-0.407685	-0.342955	0.32957		4.0621
UGCUUC	-0.122378	-0.260215	1.21558	-0.484548		0.770509
UGCUUA	-0.0176852	-1.63974	-0.928439	-0.617227		0.759447
UGCUGU	-1.08031	0.274095	0.393923	-0.119293		3.77335
UGCUGG	-0.039944	4.71317	3.18123	3.71659		0.00191049
UGCUGC	-1.46546	1.27529	1.49967	1.46041		0.0803202
UGCUGA	-0.391021	0.447145	0.476827	0.12449		0.000871661
UGCUCU	1.67171	1.21264	1.36623	0.286108		0.9477
UGCUCG	-0.0365921	0.272392	-0.0369475	0.378134		0.0951088
UGCUCC	0.863348	6.98529	7.91263	6.4069		0.0229506
UGCUCA	0.080306	0.0319446	1.07489	0		0.0834005
UGCUAU	1.1321	-0.185965	-0.271215	0.394312		0.440017
UGCUAG	-0.2513	-0.785986	-0.164948	-0.0391444		0.525228
UGCUAC	0.19098	-0.839143	-0.311329	0.298826		0.0012568
UGCUAA	-0.0947342	-0.835446	-1.00471	-1.38977		0.322234
UGCGUU	0.0356636	-0.268769	0.459972	0.342116		0.744819
UGCGUG	-0.61265	0.877227	0.167098	-0.126075		0.888132
UGCGUC	-1.21128	0	-0.21304	-0.730762		0.709004
UGCGUA	-0.0553516	0.58652	0.859885	0.0502458		0.0794541
UGCGGU	-0.0882623	-0.037712	-0.191707	-1.3194		0.702128
UGCGGG	0.124269	0.578463	0.475965	0.373813		0.156458
UGCGGC	0.533147	1.01071	1.40815	1.18391		0.0853779
UGCGGA	-0.758511	0.365718	0.302894	0.533748		0.0135264
UGCGCU	-0.890128	0.111517	0.154729	0.0715759		0.294313
UGCGCG	-1.78686	0	0.222918	-0.696377		1.22375
UGCGCC	-0.546963	1.19878	0.176052	0.119944		0.1721
UGCGCA	0.169423	-0.0411072	-0.252292	-0.188261		0.0389712
UGCGAU	0.0474342	-0.701508	0	-0.717435		1.6115
UGCGAG	-0.0472317	-0.0520413	0.353399	0.279008		0.466527
UGCGAC	0.193914	-0.058293	0.0548337	0.782909		0.247228
UGCGAA	-0.708522	-0.377227	1.02209	0.242083		1.28919
UGCCUU	0.259432	0.587804	0.440077	2.43714		1.43154
UGCCUG	0.722742	5.19954	7.58564	7.1262		0.0801398
UGCCUC	-0.723506	5.35983	1.97577	1.3053		0.00245601
UGCCUA	0.790651	1.04449	-0.248075	0.365721		0.413431
UGCCGU	0.0624423	-0.620991	1.23978	0.221729		0.822593
UGCCGG	-1.82737	0.0366003	1.24779	0.155329		0.394386
UGCCGC	0.828826	1.38626	1.32902	3.03632		0.243116
UGCCGA	-0.186184	-0.0881935	-0.150692	1.06741		0.452523
UGCCCU	-0.027569	5.87965	9.71427	5.83307		0.336715
UGCCCG	-0.624401	2.22972	4.12724	1.93757		0.314627
UGCCCC	-0.03249	9.20987	5.56759	5.26029		0.00425884
UGCCCA	2.39264	2.83068	8.41284	4.46226		0.0264815
UGCCAU	0	0.0327263	1.5846	1.45872		0.291647
UGCCAG	-0.245605	2.5399	3.42825	1.94764		0.00615636
UGCCAC	0.033476	1.35144	2.32648	4.58538		0.00895768
UGCCAA	0.530599	0.222816	0.89744	0.752015		0.526233
UGCAUU	-0.417532	-1.26854	-5.17979	-1.68815		3.62084
UGCAUG	0	-0.432071	-0.172579	0.30322		0.983077
UGCAUC	0.620353	-0.064402	-0.0630903	0.426309		0.149992
UGCAUA	-0.392334	-2.26321	-2.36585	-1.2576		0.250703
UGCAGU	-1.98067	-1.04048	-0.138958	-0.47093		1.2513
UGCAGG	-0.399427	5.16809	2.34774	1.88426		0.00102075
UGCAGC	-0.0848799	2.25024	1.64648	1.58679		0.0669336
UGCAGA	-0.487578	0.352048	-0.230434	0.0442395		0.0319914
UGCACU	-1.07558	-1.38798	0	0.0522387		0.130959
UGCACG	-0.840144	0.447837	0.824287	0.342624		0.0848296
UGCACC	0.184612	1.325	1.65099	0.819893		0.0499281
UGCACA	0.254591	-0.0150288	1.91096	0.426932		0.00669302
UGCAAU	0.627868	0.625669	0.089725	0.191897		0.175144
UGCAAG	0.316806	-0.372299	-0.996368	-0.169778		0.192045
UGCAAC	0.460177	-1.92263	-0.0762832	-2.71544		0.113154
UGCAAA	1.04884	-5.06123	-2.81526	-2.65488		0.0393501
UGAUUU	-0.273021	-2.19786	-5.90818	-2.58849		1.58911
UGAUUG	-0.876603	-0.856858	-0.810863	-0.49871		2.27585
UGAUUC	0.264957	-0.277698	-0.397987	0.0811595		0.641735
UGAUUA	0.104967	0.19716	-2.51465	-1.12287		0.567149
UGAUGU	-0.553026	-3.72517	-1.98459	-4.13808		1.12902
UGAUGG	-0.799449	0.28594	-0.409111	0.0729953		0.0684657
UGAUGC	0.491342	0.231499	2.56364	0.59561		0.187868
UGAUGA	-0.640211	0.333725	-0.279091	-0.298237		0.425427
UGAUCU	0.167255	0.0190287	-0.268661	-0.284077		0.328197
UGAUCG	0.36472	1.97973	0.25057	0.463395		0.361699
UGAUCC	1.18251	1.1103	0.931183	0.151612		0.0647367
UGAUCA	1.76803	-1.85238	-0.716748	-0.85751		0.0048994
UGAUAU	0.568809	-0.715155	-3.48055	-2.65524		0.55948
UGAUAG	0.951717	-0.449911	-1.23775	-0.770773		1.21742
UGAUAC	-1.76302	-0.882739	-1.62378	-0.514685		0.699475
UGAUAA	-0.340514	-0.206841	-1.17288	-2.24067		0.242287
UGAGUU	0.11291	-1.51123	-0.916353	-0.599298		0.112652
UGAGUG	-1.59118	0.105508	-0.448063	0.0840744		0.803086
UGAGUC	0.445524	0.169055	0.225565	-0.3717		0.050397
UGAGUA	0.0400354	-1.26831	-0.253037	-0.442643		0.366239
UGAGGU	-0.892886	-0.134536	-0.114521	-0.199683		0.222928
UGAGGG	0.301753	4.14771	4.23378	3.43312		0.0136068
UGAGGC	0	1.03049	0.939764	1.31142		0.0134661
UGAGGA	-0.880885	0.73917	1.02276	1.15448		0.0113415
UGAGCU	0.113889	0.837046	2.13068	2.1529		0.154418
UGAGCG	0.131863	1.42179	0.607514	0.173251		0.182316
UGAGCC	-0.313811	3.15005	8.64863	2.60864		0.00305147
UGAGCA	-0.543562	-0.282302	0.0676452	0.598558		0.0201931
UGAGAU	0	0.221293	-2.508	-1.78426		0.246179
UGAGAG	-0.460392	-0.248739	-0.200324	0.0145291		1.03491
UGAGAC	-0.37371	0.0969989	-0.761064	-0.696485		0.0768909
UGAGAA	0.742448	-0.106856	-0.58564	-1.328		0.133153
UGACUU	-1.4021	-0.311341	-0.821255	-0.132072		1.09615
UGACUG	-1.06246	0.546082	-0.261038	0.154306		0.00432879
UGACUC	0.967751	0.81747	2.58608	1.18123		0.0389029
UGACUA	1.11553	-0.26447	-0.311329	-0.504444		0.643723
UGACGU	-0.0400663	0.0431323	0.436507	0.261346		0.0338461
UGACGG	-0.599116	-0.307084	-0.852274	-1.82022		0.158588
UGACGC	-0.0491766	0.0504502	0.159904	0		0.623362
UGACGA	-0.383104	-0.165353	1.45323	0.850804		0.614828
UGACCU	0.358665	0.824942	3.47295	1.68441		0.0428535
UGACCG	0.131863	1.15378	0.42051	0		0.207443
UGACCC	0.038017	2.37081	4.19865	3.20681		0.0562507
UGACCA	0.108132	1.2303	0.787246	1.36235		0.176178
UGACAU	0.0482898	-1.6012	-0.833374	-1.50787		0.0541963
UGACAG	-0.0298778	0.385403	0.101027	0.116235		0.0253612
UGACAC	0	0.233557	0.961979	-0.0189495		0.022303
UGACAA	1.45243	-0.921807	-2.40671	-0.101564		0.0947893
UGAAUU	-0.156314	-3.46436	-4.82414	-5.36012		0.785786
UGAAUG	0.109038	0.350617	-1.01209	-0.101116		0.205022
UGAAUC	0.832866	-0.095224	0.283996	-0.135001		0.0981249
UGAAUA	0.0158615	-2.5383	-3.64046	-2.77224		0.416401
UGAAGU	-0.593468	-2.92911	-2.32113	-2.2145		3.12357
UGAAGG	0	0.0482235	0.70427	1.05698		0.570604
UGAAGC	-0.166515	-0.0171246	-0.352998	0.222508		0.144095
UGAAGA	-0.0811104	-0.0707603	-0.0428009	-0.764892		0.0148108
UGAACU	-1.18662	-4.21602	-4.11236	-4.57482		0.869295
UGAACG	-0.652714	0.392133	-1.02928	-0.256009		0.329385
UGAACC	-0.298443	0.512962	0.227198	0.0631832		0.0836202
UGAACA	0.0643799	-1.30679	-0.839815	-1.09412		0.117081
UGAAAU	-0.607752	-2.62065	-5.75628	-2.0726		1.43605
UGAAAG	-0.626069	-1.6206	-3.46559	-2.60006		0.692376
UGAAAC	-1.55384	-0.179344	-0.729943	-0.554622		0.155232
UGAAAA	0.0851677	-3.43414	-5.68215	-4.4655		0.250459
UCUUUU	-1.79327	-0.823214	-6.49497	-5.4786		11.0286
UCUUUG	0.747047	-2.44923	-2.94692	-1.61598		1.21886
UCUUUC	2.04473	-3.04384	-0.0857086	0.130893		4.42022
UCUUUA	-0.205505	-1.26515	-1.93832	-1.7373		0.659074
UCUUGU	-1.13824	-3.05903	-1.711	-1.1356		5.74919
UCUUGG	-0.429279	0.200826	0.997634	0.402925		0.00484168
UCUUGC	1.7131	1.76764	0.805107	1.26823		0.0711263
UCUUGA	-2.31246	0.0528547	-1.69565	-0.625991		0.944074
UCUUCU	4.44636	-1.42841	2.18524	0.0125839		0.00386262
UCUUCG	0.751079	-0.586453	0.186168	0.040845		2.13922
UCUUCC	2.65457	3.03307	2.79847	2.48693		0.253626
UCUUCA	-0.0569225	-0.84854	-0.476333	-0.490387		1.49096
UCUUAU	1.37292	-1.69152	-0.893605	-1.29148		0.642177
UCUUAG	0.272352	0.166117	-0.921067	-0.238345		0.156934
UCUUAC	0	-1.05145	-0.184315	-0.822003		0.0960367
UCUUAA	-1.75204	-0.639131	-2.43134	-1.92178		3.51276
UCUGUU	-0.195998	-1.04343	-0.717762	-0.252838		8.41257
UCUGUG	-0.0556552	0.29057	-0.0113134	-0.410201		8.23988
UCUGUC	0.131942	1.83112	1.29018	1.97753		16.4747
UCUGUA	-0.285665	-0.152222	-1.52077	-0.449057		2.09969
UCUGGU	-0.4035	-0.050503	0.0326462	0.28938		2.32523
UCUGGG	-0.0983116	3.77587	8.55201	4.04293		0.00510802
UCUGGC	-0.286422	1.50581	3.1692	4.36073		0.170938
UCUGGA	0.458922	1.77473	2.82281	0.707891		0.00174204
UCUGCU	0.853726	1.10507	4.70223	0.83509		0.425532
UCUGCG	-0.464569	0.299423	0.643377	0.373813		0.203374
UCUGCC	0.571813	5.7876	4.39819	2.37052		0.322911
UCUGCA	0.0280895	-0.0445702	0.0145702	0.356334		0.160685
UCUGAU	0.128812	-0.982298	-1.7902	-0.801328		0.571331
UCUGAG	1.15372	0	0.190683	0.187207		0.000131346
UCUGAC	-0.0689785	1.14729	0.962586	0.698057		0.12144
UCUGAA	0.0696366	0.0739376	-0.402791	-0.228307		0.232461
UCUCUU	3.21531	0.388287	0.486133	-0.0123774		0.579287
UCUCUG	0.577091	2.55587	3.96683	3.59072		1.01742
UCUCUC	8.34783	-0.479364	-0.075833	0.172822		0.462803
UCUCUA	1.0689	-0.610452	0.351693	0.0948981		0.159021
UCUCGU	0.0752171	0	0	0		4.91355
UCUCGG	1.20656	-0.43938	0	0.0321848		0.428539
UCUCGC	-0.128865	-0.625415	-0.217801	-0.731313		0.647218
UCUCGA	0.133483	0.418167	0.267365	0		0.527077
UCUCCU	1.37406	3.45098	3.32865	1.72894		0.0531988
UCUCCG	-0.0389377	1.73649	0.454618	0.169118		0.629433
UCUCCC	-0.104634	1.46723	2.53296	4.06643		1.38499
UCUCCA	0.484822	2.56268	2.80943	1.0687		0.0683946
UCUCAU	1.49795	0.474451	-0.285053	0.224833		0.563026
UCUCAG	-0.068505	1.27103	2.85874	2.29396		0.162944
UCUCAC	-0.485928	0.16027	1.17811	2.77695		0.513052
UCUCAA	1.66698	-0.017842	0.315838	0.0549225		0.0215016
UCUAUU	0	-0.673248	-2.79372	-2.09245		1.62399
UCUAUG	2.72676	-1.3076	-1.26977	-0.614366		1.2523
UCUAUC	2.53397	1.08731	1.35648	-0.153617		0.338561
UCUAUA	0.95463	-0.159068	-2.69125	-0.308372		0.171776
UCUAGU	-0.476065	-0.144534	-1.66148	-0.585939		1.78755
UCUAGG	2.26461	1.23945	0.0672881	1.69148		0.0674945
UCUAGC	-0.292882	1.30135	0.151861	0.931479		0.222594
UCUAGA	0.609767	0	-0.0195727	0.102518		0.0376009
UCUACU	0.0995292	-1.51749	-0.144194	-1.15908		0.447364
UCUACG	0	-0.173929	-0.175332	-0.770293		0.0769873
UCUACC	1.04339	1.87533	3.70383	4.06417		0.0192112
UCUACA	0.731333	-0.175495	-1.14851	0		0.00216123
UCUAAU	-0.610609	-2.32651	-2.11911	-0.823651		0.872475
UCUAAG	0.850085	-0.740878	-0.82439	-1.48373		0.0538262
UCUAAC	-0.37646	-1.10696	-0.049996	-0.0240578		0.0928961
UCUAAA	0.779296	-2.77243	-2.69961	-4.09928		0.0980626
UCGUUU	-0.88328	-0.0676081	-0.0707379	-0.106994		4.75044
UCGUUG	-0.134899	-0.536362	-0.0438739	0.0977474		2.39165
UCGUUC	-0.079644	-0.0839281	-0.178396	-0.462088		1.1781
UCGUUA	-1.29885	-0.740796	-0.920263	-0.5928		3.38958
UCGUGU	0.0656515	0.536132	-0.265484	-0.725692		7.16204
UCGUGG	-0.402281	-0.0354147	0.113297	0		0.0946139
UCGUGC	-0.177334	-0.772991	-0.289587	0.81905		0.706348
UCGUGA	0.0892355	0.261752	0.215179	1.1473		0.241234
UCGUCU	0.0693196	-0.264868	1.31443	0.200278		2.95562
UCGUCG	0	0.21265	0.464557	1.09764		0.980146
UCGUCC	-0.982098	2.96902	0.0450604	0		0.555958
UCGUCA	-0.482257	0.136498	0	0.175329		0.431287
UCGUAU	-1.29527	-0.972752	-0.463848	-2.25407		3.81789
UCGUAG	0.90128	0.336448	0	-0.696249		0.114875
UCGUAC	-0.0645107	0	0.689689	0.247021		1.26036
UCGUAA	0.230511	0	-0.199494	-0.17759		0.770395
UCGGUU	-1.42024	-1.93165	-0.687808	-0.389414		3.06307
UCGGUG	1.06469	0.373406	-1.03473	0.206672		0.664327
UCGGUC	0.694116	-0.089638	-0.094807	-0.260991		0.0386694
UCGGUA	-0.838179	-1.35595	-0.871768	-0.373921		1.00164
UCGGGU	0.152088	0.233414	0.088383	3.291		0.473895
UCGGGG	-0.449284	0.804819	0.216361	0.153939		0.479693
UCGGGC	-0.346102	-0.333928	0.13317	-0.231647		0.0705334
UCGGGA	0.0377982	-0.258455	-0.219068	-0.218533		0.392017
UCGGCU	0.115474	-0.224143	0.740527	0.0736005		0.00255345
UCGGCG	-0.224364	0.106928	0	0		0.00417564
UCGGCC	0.377114	0.946389	3.57849	3.18836		1.07888
UCGGCA	-0.436791	-0.281781	-0.203701	-0.553966		0.243863
UCGGAU	-1.7324	-0.730072	0.110899	-0.050755		0.353028
UCGGAG	-0.429208	0.597098	0.631853	0.0377449		0.13342
UCGGAC	-0.104799	2.23418	1.71475	1.07514		0.0312416
UCGGAA	-0.0842673	-0.0398398	0.260013	-0.521811		0.034879
UCGCUU	-0.853773	-0.132429	0.392549	-0.1231		1.49748
UCGCUG	-0.1019	-0.508747	0.104267	0.373575		0.745994
UCGCUC	-0.0786045	0.264078	-0.138927	-0.584824		0.548729
UCGCUA	0.324082	-0.0644704	0.0667996	0.432155		0.133054
UCGCGU	0	0.422942	0	0.437697		1.66392
UCGCGG	-0.247621	0.392762	1.26582	0.213988		0.16599
UCGCGC	0	0.190854	1.15001	0.317744		1.30925
UCGCGA	0	0.769727	0.354362	0.316449		0.410302
UCGCCU	0.163928	0.952119	-0.178396	0.264225		0.147243
UCGCCG	-0.870491	-0.757036	0	-0.739131		0.471756
UCGCCC	0.0943491	0.871448	1.19065	0.542174		0.547923
UCGCCA	-0.546963	0.243886	-0.175453	-0.458967		0.0588503
UCGCAU	0.0517435	0.297465	0.903882	-0.639309		0.438502
UCGCAG	-0.597669	-0.0457005	0.13317	-0.458967		1.08595
UCGCAC	0.27707	-0.125769	0.554751	0.0568065		0.36636
UCGCAA	0.549107	0.243093	-0.735477	0.150716		0.069771
UCGAUU	0.406235	-0.30697	-0.170149	-0.193913		0.00473977
UCGAUG	0.34551	-0.52182	0.225433	0.0493422		1.44038
UCGAUC	0.708997	-1.35595	0.0581155	0.0610332		0.221541
UCGAUA	0.129905	0	0.420525	0.655543		1.26036
UCGAGU	-0.773969	-0.402194	-0.360985	-0.130076		0.12179
UCGAGG	-0.977425	-0.661268	0.295141	-0.0349104		0.0494294
UCGAGC	0.38899	0.818036	0.767848	0.970787		0.269978
UCGAGA	-0.826881	-0.14767	0.726644	-0.260991		0.00234161
UCGACU	0.106231	-1.17803	-0.115673	-0.252862		0.0218584
UCGACG	-1.10873	0.124967	0.129197	-0.282703		0.547193
UCGACC	0.0654994	0.937637	-0.0658765	-0.20663		0.623138
UCGACA	0.263331	-0.197122	0.211097	0.554051		0.072221
UCGAAU	0.21796	-0.482137	-0.484102	-0.11084		0.164325
UCGAAG	0.221607	0.0460698	-0.157813	0.334877		0.178691
UCGAAC	0.273005	0.385614	0.117231	-0.161512		0.55502
UCGAAA	0.0958935	-0.377227	-0.186345	-0.493762		0.0408755
UCCUUU	-0.594038	-0.151646	-1.7097	0.104899		2.10774
UCCUUG	0.382298	1.23141	3.40838	0.0889328		2.16528
UCCUUC	0.987443	0.675173	0.738647	2.1321		0.138801
UCCUUA	1.48604	-0.575181	-0.932989	0.204187		0.762845
UCCUGU	-0.196283	2.15102	-0.19756	0.704857		0.407605
UCCUGG	0.0643266	5.4795	7.28373	6.21849		4.12e-05
UCCUGC	-0.279066	4.83607	3.35695	2.00707		0.00905636
UCCUGA	0.124414	0.764117	2.19917	1.87808		0.00897107
UCCUCU	4.01072	2.73108	4.19047	4.10529		1.32965
UCCUCG	-0.516553	0.653236	0.799993	0.764375		1.62231
UCCUCC	12.4489	5.2417	3.08729	9.13455		0.309279
UCCUCA	0.924935	1.27709	0.534849	2.02623		0.00113766
UCCUAU	0.341372	-0.536786	0.142994	-0.0413839		0.315386
UCCUAG	0.551308	-0.0583321	0.800835	-0.0992781		0.0961034
UCCUAC	0.567731	0.72619	1.06897	0.0673422		0.0137163
UCCUAA	0.13683	0.300685	-0.110278	-0.107053		0.32168
UCCGUU	-0.490608	0.366369	-0.0773795	0		1.49753
UCCGUG	-1.9883	-0.492401	-0.590295	0		1.30653
UCCGUC	-0.628228	0.347729	0.216361	0.211183		0.958776
UCCGUA	0.206976	-0.776289	0.303409	-0.10831		0.112519
UCCGGU	0	-0.10338	-0.378703	-0.214124		0.0243877
UCCGGG	0.295885	0.0407567	0.616383	0.525732		0.0195406
UCCGGC	-1.41286	0.15962	0.696842	0.091892		0.112519
UCCGGA	0.210631	0.0946438	-0.0989009	0.313638		0.301959
UCCGCU	0.252291	1.94	2.69224	2.03134		0.0808682
UCCGCG	0.680527	0.903461	1.04475	1.5794		0.129251
UCCGCC	0	0.431553	2.61754	2.38699		0.526069
UCCGCA	-1.2607	-0.049554	-0.229371	-0.455374		0.381206
UCCGAU	-0.130513	0	0.112576	0.308079		0.0120689
UCCGAG	0.0350024	0.358948	0.380242	0		0.0798143
UCCGAC	-0.668048	0	0.225433	-0.582981		0.0599933
UCCGAA	0.46734	0	0.211937	0.313638		0.0169105
UCCCUU	-0.608628	4.14727	4.24176	4.13564		1.76184
UCCCUG	1.32565	5.86036	8.2947	5.42046		0.111431
UCCCUC	0.583137	5.35983	10.0903	5.95169		1.41786
UCCCUA	0.103453	2.61652	1.10331	1.44486		0.158861
UCCCGU	-0.881474	0.228833	1.29959	1.06699		1.38237
UCCCGG	-0.0665509	0.790082	1.42094	0.192794		0.190487
UCCCGC	-0.352218	1.61887	1.32047	1.91648		0.117211
UCCCGA	0.495163	0.205096	0.73351	0.233708		0.00168165
UCCCCU	0.619849	5.67085	3.96057	3.03419		0.361487
UCCCCG	-1.45818	1.92788	1.27417	1.37516		0.658532
UCCCCC	1.64165	2.2101	6.36017	2.72221		0.247113
UCCCCA	2.6246	9.33664	10.0041	10.4611		0.00904872
UCCCAU	0.188529	0.555802	3.59352	0.508675		0.528579
UCCCAG	1.52417	5.40113	4.79014	3.89015		2.73e-06
UCCCAC	1.18373	3.27104	6.5959	3.96544		0.000870926
UCCCAA	2.74229	1.13548	0.679823	1.01944		0.00472785
UCCAUU	1.05404	-0.114106	-0.203937	0.273614		0.327848
UCCAUG	1.08964	1.19155	2.27108	0.758754		0.191784
UCCAUC	0.989304	3.39395	3.51728	2.81426		0.212547
UCCAUA	0.103724	-1.22922	-3.52771	-2.10267		0.0273552
UCCAGU	-0.353665	2.50671	0.708218	1.57195		0.725614
UCCAGG	1.38096	4.92805	7.84919	4.53632		0.0141509
UCCAGC	-0.0966307	0.594909	6.31328	3.67295		0.0342446
UCCAGA	0.597419	0.800582	0.807027	0.381383		0.245799
UCCACU	-0.48927	0.953628	2.71893	3.12075		0.0284819
UCCACG	0.457817	0.900049	0.0339985	0.82531		0.244754
UCCACC	0.963119	4.90705	3.44768	4.22164		0.0113145
UCCACA	0.923027	0.21845	2.24182	0.662832		0.00169306
UCCAAU	0.499536	-0.188455	0.493653	0.123151		0.202374
UCCAAG	0.109093	-0.111327	0.748467	-0.247308		0.00211345
UCCAAC	0.475368	0.676143	0.420395	0.550679		0.0208117
UCCAAA	1.85425	-1.53477	-1.39035	-2.90612		0.178193
UCAUUU	-0.0758107	-1.89206	-7.20511	-1.29176		3.63051
UCAUUG	-0.339335	-0.0538241	-0.183137	-2.03273		0.953139
UCAUUC	0.395388	-1.45575	-0.377715	-0.392382		0.562181
UCAUUA	2.96908	-0.31761	-1.08229	0.0585552		0.942929
UCAUGU	0.853852	-0.893348	-2.46608	-1.89671		3.68225
UCAUGG	-0.0342974	-0.0575228	1.04847	0.661536		0.0872722
UCAUGC	1.02167	-0.652617	-0.89567	0.229507		0.00218648
UCAUGA	-0.480426	-1.03962	-0.397987	-0.845012		0.122378
UCAUCU	0	0.594473	0.66766	0.487461		0.258925
UCAUCG	-0.652758	0	0.0964441	-0.205816		0.364314
UCAUCC	0.41849	1.38829	1.30767	1.3905		0.012547
UCAUCA	3.67443	-0.0420675	-0.683914	-0.208439		0.047293
UCAUAU	0.0998135	-1.47261	-1.31554	-2.25719		0.607896
UCAUAG	-0.952763	-0.578452	-2.26097	-0.398413		0.343475
UCAUAC	0.929424	-0.10265	-0.780286	-0.592403		0.120684
UCAUAA	1.52725	-0.596452	-2.6863	-1.48463		0.0640135
UCAGUU	-1.52968	-2.41804	-7.07046	-3.24812		1.33574
UCAGUG	-0.183219	-0.371581	0.841852	0.139333		1.80788
UCAGUC	-1.03223	1.42147	1.15947	0.0776702		0.115352
UCAGUA	-1.77312	-5.33996	-3.71659	-3.29573		1.51803
UCAGGU	0.0535433	0.498952	0.688884	0.0539066		0.0375865
UCAGGG	0.391299	1.27234	5.60967	1.91079		1.17e-05
UCAGGC	-0.143535	1.1383	2.26648	1.9336		0.00246625
UCAGGA	0.249282	1.20226	1.41402	0.72787		0.00199885
UCAGCU	-0.207138	3.27451	1.04751	1.89504		0.0492958
UCAGCG	0.229044	0.871912	1.10987	0.893311		0.0888922
UCAGCC	0.528617	2.23176	4.40455	6.50702		0.0135563
UCAGCA	-0.178133	0.18568	0.889889	0.978383		0.00278014
UCAGAU	0	-0.647093	-0.474392	-0.130133		0.970765
UCAGAG	0.30153	1.58778	0.225741	-0.0135758		0.000602297
UCAGAC	0.0175239	0.0385359	0.610707	1.61056		0.00228457
UCAGAA	-0.026982	-1.51588	-1.62065	-0.396233		0.0963905
UCACUU	-0.717293	-0.0328569	-0.190589	0.0323929		0.157119
UCACUG	-0.0592373	0.218041	0.23536	2.72387		0.0113035
UCACUC	1.55137	1.68346	0.174926	1.55013		0.00286182
UCACUA	-0.0683455	-0.248069	0.0477082	0.335233		0.122642
UCACGU	-0.205559	-0.19757	0.540021	0.329484		1.09743
UCACGG	-0.172531	0.63864	0.365373	0.0377449		0.00635664
UCACGC	0.372124	0.89758	0.0462593	1.06741		0.415765
UCACGA	-0.444748	0.346246	0.283428	0		0.299766
UCACCU	0.681167	0.133873	1.00115	0.2726		0.0798747
UCACCG	-1.1111	2.0876	0.336079	2.4747		0.0462019
UCACCC	0.0838059	4.06403	5.55746	5.57172		0.422063
UCACCA	0.251246	1.39833	0.744231	1.1704		0.615153
UCACAU	0.52649	0.248774	-0.120182	0.272871		0.154207
UCACAG	1.43696	-0.0305319	1.86338	1.29682		0.0401501
UCACAC	1.51115	0.0374577	0.341446	1.46908		0.102218
UCACAA	1.78149	-0.46851	-0.787071	-0.615278		0.00625808
UCAAUU	0.244546	-0.668721	-0.722205	-0.946622		1.21321
UCAAUG	1.37371	-0.662673	-4.61147	-0.629787		0.487186
UCAAUC	1.71972	-0.975249	-0.430291	-0.324081		0.321386
UCAAUA	0.756295	-0.291863	-0.703926	-0.527287		0.0148562
UCAAGU	0.295741	0.123563	-0.337914	-0.344373		0.516537
UCAAGG	1.51977	0.651637	1.17547	0.219932		0.00957753
UCAAGC	0.514585	-0.52752	-0.397006	-0.866093		0.00160056
UCAAGA	0.302549	-0.264234	-0.142678	0		0.188466
UCAACU	1.01338	-0.525353	-0.197885	-1.1572		0.0346283
UCAACG	0.361278	-0.220473	0.191707	-0.120193		0.0372218
UCAACC	0.688667	0.239184	0.592506	0.0245366		0.342086
UCAACA	0.973974	0.0203014	-0.0656128	-0.221666		0.0226381
UCAAAU	-0.509683	-4.02325	-1.71187	-2.49803		0.0216896
UCAAAG	1.20934	-0.959675	-0.155352	-0.361335		0.0150863
UCAAAC	-0.212253	-1.17666	-3.03179	-3.15705		0.0083054
UCAAAA	1.96103	-1.77716	-3.45188	-1.36785		0.0258444
UAUUUU	-2.71456	-14.1794	-23.9026	-12.1406		3.64205
UAUUUG	-0.415737	-7.04015	-8.65154	-6.70346		3.60878
UAUUUC	-0.709973	-1.52918	-5.2724	-2.63519		2.02905
UAUUUA	-5.86943	-8.91887	-14.8645	-11.5011		3.40072
UAUUGU	-0.344938	-6.32894	-6.00373	-5.04601		8.97427
UAUUGG	-0.288693	2.16429	-0.31151	0.151001		1.0197
UAUUGC	-0.0211109	-1.50215	-1.4346	-1.78654		0.559708
UAUUGA	0.192545	-1.33124	-2.26886	-3.1325		0.161011
UAUUCU	1.57024	0.506943	-0.0711106	-1.18444		0.37606
UAUUCG	-1.34251	-0.784421	-0.917362	-0.799523		0.680974
UAUUCC	0.746155	-0.936425	0.146266	-0.185532		0.0735943
UAUUCA	1.50907	-1.00167	-1.98698	-0.549846		0.183115
UAUUAU	0.113478	-3.61809	-6.15848	-5.17234		0.426102
UAUUAG	-0.0899126	-3.11173	-2.2773	-0.866237		0.880169
UAUUAC	0	-3.3542	-5.01424	-5.59837		1.13841
UAUUAA	-0.124007	-3.51564	-5.10656	-2.10583		1.11406
UAUGUU	-0.095221	-1.97142	-5.7895	-3.44457		8.27829
UAUGUG	-0.59936	-1.13111	-2.21691	-2.13076		3.24148
UAUGUC	-0.241958	0.210297	0.346413	-0.12467		3.37954
UAUGUA	-0.950898	-6.22939	-9.77608	-6.8531		1.34237
UAUGGU	-0.0207815	-0.145952	-0.36856	0.0434814		1.42551
UAUGGG	-0.230677	-0.287976	-0.0242729	0.096749		0.399312
UAUGGC	0.64558	0.0850908	0.31057	0.213206		0.0193961
UAUGGA	-0.105989	-1.5844	-1.86826	-1.28449		0.0749785
UAUGCU	0.593582	-1.27663	-1.68946	-0.221666		2.41468
UAUGCG	0.0574482	-0.367973	-0.829442	-0.309878		0.380601
UAUGCC	0.806161	-0.0258436	-0.249059	0.081995		0.29622
UAUGCA	0.143765	-0.401874	-0.938002	-0.585248		0.249203
UAUGAU	0.807026	-0.229948	-0.650892	-1.57878		0.100408
UAUGAG	0.0428067	-0.718389	-1.43036	-1.62446		0.192424
UAUGAC	0.0233044	-1.13716	-0.868406	-0.267951		0.0524393
UAUGAA	-0.642319	-1.64288	-3.78911	-3.68348		0.0248495
UAUCUU	0.410528	-2.85755	-6.09694	-1.08669		0.18329
UAUCUG	0.420267	-0.195641	-0.454605	-2.06988		1.23436
UAUCUC	1.55803	1.04226	0.522581	1.16845		0.761711
UAUCUA	2.18399	-1.54372	-0.478558	-1.72351		0.0927626
UAUCGU	-0.102238	-0.830586	-1.02145	-0.914447		1.2654
UAUCGG	0.798568	-0.13055	0.496204	0.140522		0.63555
UAUCGC	-0.252074	0.263897	1.44839	0.229131		0.379341
UAUCGA	-0.220645	-0.273689	-0.405611	-0.0544045		0.0137024
UAUCCU	0.747811	0.206456	-0.166512	-0.618219		0.0242714
UAUCCG	-0.0584685	-0.204257	-0.444844	-0.543063		0.922413
UAUCCC	0.612389	0	0.578372	0.256943		0.0031269
UAUCCA	0	-1.34918	-3.22295	-1.35115		0.0617457
UAUCAU	0.734362	-0.461361	-2.10996	-2.27229		0.355265
UAUCAG	-0.461325	-2.32651	-0.553474	-0.809787		1.15249
UAUCAC	1.39328	-0.498419	-0.588474	-0.957694		0.0766987
UAUCAA	0.685954	-0.540627	0.0475231	-0.280894		1.20462
UAUAUU	-2.53595	-9.89678	-17.686	-13.3015		3.2773
UAUAUG	-0.961838	-4.12257	-11.5365	-7.02609		0.368897
UAUAUC	1.20882	-0.989153	-0.926578	-0.656952		0.182815
UAUAUA	-3.90984	-19.1722	-12.4341	-4.98792		1.97057
UAUAGU	-0.825706	-4.06784	-4.58767	-2.21395		0.294726
UAUAGG	2.08424	-0.274669	-0.124881	0.235652		0.135194
UAUAGC	0.128352	-1.10696	-0.425687	-0.02381		1.93857
UAUAGA	0.935619	-2.74171	-4.12991	-2.56988		0.022252
UAUACU	-0.435478	-1.59443	-2.63114	-1.89616		0.787758
UAUACG	0.0574482	-0.704581	-0.127558	-0.770293		0.0528255
UAUACC	0.483938	-1.35297	-2.69547	-1.08564		0.0383283
UAUACA	0.571244	-2.53368	-3.37459	-1.90214		0.03252
UAUAAU	-1.13436	-5.46029	-6.62876	-4.08232		0.482072
UAUAAG	-0.0216337	-2.53809	-3.16105	-2.5308		0.15761
UAUAAC	0.441653	-1.2325	-3.0165	-0.790742		0.285894
UAUAAA	-0.55927	-4.69957	-11.6421	-6.7107		1.18647
UAGUUU	-1.3286	-2.03076	-7.90437	-2.84489		6.30198
UAGUUG	-1.61274	-1.01177	-7.52821	-2.97111		1.97976
UAGUUC	1.31673	-0.262066	-0.447521	0		0.954132
UAGUUA	-0.209044	-2.45287	-4.36826	-1.33802		2.81334
UAGUGU	-0.968448	-0.518217	-5.19206	-2.55348		3.70018
UAGUGG	-0.165685	0.217081	0.155207	0.704988		0.180153
UAGUGC	0.0242824	0.172154	-0.0263471	0.533667		1.26529
UAGUGA	0	0.150611	0.182985	0.419309		0.761562
UAGUCU	0.341372	0.748122	-0.83685	-0.507174		0.429495
UAGUCG	-0.705583	-0.337291	-0.235747	-0.287481		0.348655
UAGUCC	-0.619193	0.0549862	-0.11275	0.138493		0.0125338
UAGUCA	-0.345541	-0.914941	-0.818967	-0.0948478		0.368661
UAGUAU	-0.384238	-1.73782	-3.91086	-1.48065		0.979114
UAGUAG	0.380896	-0.311564	-1.86233	0.313497		2.71533
UAGUAC	-0.8102	-1.12056	-2.66378	-0.725358		1.09709
UAGUAA	0.88783	-1.58051	-1.69928	-1.28218		1.47798
UAGGUU	-0.429488	-0.239679	-1.78035	-0.386931		2.70986
UAGGUG	0.116787	1.3224	0.13073	0.189643		0.6566
UAGGUC	0.0852567	0.547215	0.188115	0.76865		0.553377
UAGGUA	0.048717	-0.740015	-0.394166	-1.12117		0.291304
UAGGGU	-0.0458198	0.669576	1.63985	0.385383		0.89268
UAGGGG	0.317929	1.19889	-0.0713077	0.688789		0.118914
UAGGGC	0.291191	3.23946	4.8345	4.19123		0.0612436
UAGGGA	0.665413	0.522098	0.540632	0		0.782012
UAGGCU	0.040505	1.79145	0.908332	1.44001		0.295144
UAGGCG	-0.239403	-0.062334	-0.447348	0		0.184838
UAGGCC	-0.552594	0.844062	1.00534	1.54874		0.0161985
UAGGCA	-0.266447	0.360635	0.176013	0.339473		0.272287
UAGGAU	0.941915	0.410456	-0.10102	-0.0473366		1.28342
UAGGAG	-0.556135	0.174395	1.44658	-0.108208		0.0176466
UAGGAC	0	-0.361643	-0.422243	-0.0456315		0.0471169
UAGGAA	0.442538	0.239015	-0.69037	-0.128076		0.582288
UAGCUU	0	-0.144828	-1.31137	-0.8995		2.99678
UAGCUG	0.370125	0.228525	1.52232	0.561531		0.127208
UAGCUC	-0.520083	-0.0228311	0.434489	1.07585		0.113004
UAGCUA	-0.238824	-0.0507451	-0.445765	-0.820719		0.380864
UAGCGU	-1.57653	-0.0520848	-0.266542	0.111153		3.24352
UAGCGG	0.918969	-0.273689	0.0581155	1.10872		0.172983
UAGCGC	-0.104799	0.352398	0.408845	-1.25286		0.0317683
UAGCGA	-2.35023	-0.552191	-0.609668	-1.98943		0.922148
UAGCCU	-1.68074	-0.125083	-0.311334	0.057617		0.0100724
UAGCCG	-0.383104	1.14243	0.167854	0.274249		0.488635
UAGCCC	0.200959	2.31872	1.81766	1.26407		0.0434791
UAGCCA	-0.0369861	0.791453	0.0786272	0.734722		0.042978
UAGCAU	0.828956	-0.590264	-0.836466	-0.428998		1.49119
UAGCAG	-0.605294	0.128898	0.906116	0.375504		0.725521
UAGCAC	-0.306571	-0.0713133	-0.0981783	0.487907		0.0130755
UAGCAA	0.737001	-1.22095	-1.37033	-0.673632		4.85e-05
UAGAUU	-0.32986	-2.28473	-4.69689	-0.929988		2.46296
UAGAUG	0	-0.0203509	-0.72603	-0.316596		1.16386
UAGAUC	0.104388	-0.280414	-1.88234	-0.334921		0.513257
UAGAUA	0.600308	-0.938046	-2.68907	-1.91764		0.265746
UAGAGU	0.30881	0.0205231	-1.06998	-1.91539		0.745258
UAGAGG	0.129952	0.129605	-0.235642	0.604256		0.902773
UAGAGC	-0.600822	0.293637	0.942617	-0.191742		0.0129308
UAGAGA	0.816424	-0.183525	-1.03766	-0.199046		0.00221294
UAGACU	0.0818958	0.58466	-0.328648	-0.189345		0.620146
UAGACG	0	0	0.639825	-0.283136		1.27048
UAGACC	0.927635	3.30937	0.747595	0.501873		0.361182
UAGACA	-0.218903	-0.965528	-0.311595	-0.485191		0.0775751
UAGAAU	1.38046	-3.74483	-4.07358	-3.74185		1.99777
UAGAAG	0.842376	-0.182884	0.0176121	0		0.074877
UAGAAC	0.206856	0.0216618	-0.902168	-0.147105		0.156939
UAGAAA	0.861738	-4.61537	-7.46068	-1.14564		0.287024
UACUUU	-1.23388	-1.23673	-4.09923	-2.49294		3.85895
UACUUG	-1.04557	-1.8814	-4.15549	-1.44355		1.53378
UACUUC	-0.492795	-0.138569	-0.140013	-0.280087		0.0710232
UACUUA	0.462469	-0.850242	-3.24767	-1.8189		0.0719594
UACUGU	-1.98633	-0.801971	-1.85388	-0.517321		1.65852
UACUGG	-0.338889	0.191322	-0.216037	-0.601683		0.714467
UACUGC	0.131526	-0.142391	-0.350492	-0.0953351		1.76488
UACUGA	0.0361089	-0.059165	-0.241029	-0.127151		0.429169
UACUCU	0	-1.2926	-0.613325	-0.721837		1.67978
UACUCG	-0.398861	0.58652	0.211097	0.221111		0.770395
UACUCC	0.234349	0.37251	0.603622	0.202047		0.0117434
UACUCA	0.372131	-1.04454	-0.37764	-0.655066		0.0628285
UACUAU	0.659642	-1.15788	-0.467369	-0.346366		0.538193
UACUAG	0.0262649	-1.14804	-0.659356	-0.297006		0.336237
UACUAC	-0.424796	-1.25115	-0.74436	-1.69506		0.390661
UACUAA	0.192941	-3.32514	-2.64243	-1.93441		1.3438
UACGUU	-0.0806816	-0.52182	-1.37628	-2.05477		0.965014
UACGUG	0.337999	0	0.243674	-0.573748		1.14397
UACGUC	-0.733625	-1.02383	-1.06977	-0.193913		1.53248
UACGUA	-0.325018	-0.367973	-0.28657	-0.42105		0.0263505
UACGGU	0.287863	1.09922	0.809382	0.699563		0.553606
UACGGG	-0.946187	-0.399164	-0.215659	0		0.104917
UACGGC	0.463528	0.149192	0.13364	-0.059083		0.00562245
UACGGA	-0.345795	-0.388576	-0.483411	-0.773722		0.153104
UACGCU	-0.118985	-0.125769	0.540124	0.33744		0.0723758
UACGCG	-0.327388	-0.12799	0	-0.248343		0.113708
UACGCC	-0.319837	-0.649455	-0.483345	-0.664141		0.61629
UACGCA	0.120563	-0.85487	-0.994524	-0.745267		0.601286
UACGAU	0.184659	0.129451	0.468924	-0.057437		0.151958
UACGAG	0.883878	0.633115	0	0.281385		0.227044
UACGAC	-0.767714	-0.782408	0.149582	0		0.171688
UACGAA	0.595384	-0.256098	-0.480962	-0.929041		0.016194
UACCUU	0.0962762	-0.718646	-0.1326	-0.234793		0.927169
UACCUG	0.0688399	0.261001	0.65793	0.828408		0.434861
UACCUC	-0.145474	2.07991	2.21519	0.73774		0.00630656
UACCUA	0.394557	-0.25715	-0.0758728	0.318039		0.00964895
UACCGU	-0.216477	-0.289057	-0.537337	0.0892853		0.997704
UACCGG	-0.30688	-0.415694	0.525855	0.451306		0.116336
UACCGC	-0.0538857	1.40004	-0.0554002	0.164062		0.0306973
UACCGA	-0.45987	-0.367973	-0.0554002	-0.297499		1.72181
UACCCU	0.246137	3.72977	-0.0205331	0.789194		0.0546415
UACCCG	-0.100277	-0.431186	0.65529	0.0448368		0.00672043
UACCCC	0.44176	0.328901	2.3327	1.25773		0.0447659
UACCCA	1.13373	5.45121	2.27235	1.68049		0.000640035
UACCAU	0.879118	-0.613405	-0.41162	-0.293364		0.599881
UACCAG	0.477845	-0.067904	-0.947017	0.254024		0.107637
UACCAC	1.05756	0.210297	1.17566	1.07088		0.13407
UACCAA	1.40029	0.300402	-0.0207082	0.422825		0.0928915
UACAUU	-0.492868	-4.60335	-9.8578	-6.03517		1.15693
UACAUG	0.635713	-0.516405	-1.44357	-1.51655		1.24708
UACAUC	0.192961	-0.69588	-1.21018	-0.109223		0.0172336
UACAUA	-0.789525	-4.44542	-5.63258	-3.07578		0.302905
UACAGU	-0.615195	-0.59945	-2.49623	-2.52994		4.61159
UACAGG	0.404662	-1.51285	-0.189413	-0.864434		0.0802331
UACAGC	-0.857347	0	0.339622	0.0407657		0.0850195
UACAGA	-0.570746	-3.23891	-6.30873	-2.77244		0.0302969
UACACU	0.0807501	-0.020197	-0.945578	-0.554776		0.221114
UACACG	-1.30261	-0.603637	-0.19539	-1.00237		0.60704
UACACC	0.880064	-0.259073	0.709169	-0.109202		0.0470791
UACACA	0.226835	-1.16778	-0.151442	-0.447451		0.0088966
UACAAU	0.23638	-3.25925	-3.10715	-2.40767		0.737631
UACAAG	0.780567	0.0913613	-0.650892	-0.302186		0.123555
UACAAC	0.975548	-0.635415	-0.625036	-0.301276		0.188276
UACAAA	-0.479867	-5.12818	-4.11236	-2.76868		0.239436
UAAUUU	-3.49484	-7.20197	-9.33699	-7.18124		1.70783
UAAUUG	-1.53469	-2.70339	-4.33607	-1.84074		2.97366
UAAUUC	-0.685683	-2.03085	-3.58708	-3.53162		0.239834
UAAUUA	0.580204	-0.976783	-6.83877	-1.14514		0.425069
UAAUGU	-3.12019	-3.33089	-6.15866	-3.07233		7.3026
UAAUGG	-0.75141	-0.320944	-0.174279	-0.392391		0.0966841
UAAUGC	0.0450735	-1.32732	-1.38208	-1.34834		0.218188
UAAUGA	0.436072	-2.69921	-2.4853	-2.51244		0.215791
UAAUCU	0.642411	-0.860594	0.0441501	-0.566994		1.8256
UAAUCG	-0.0601245	-0.062334	-0.445504	-0.662567		0.516853
UAAUCC	0	-0.143334	-0.0261734	1.28585		0.0231387
UAAUCA	0.178277	-0.81835	-1.94883	-0.323942		0.601763
UAAUAU	-0.225747	-2.5295	-3.58369	-4.35371		2.1678
UAAUAG	-0.718725	-0.979626	-4.34133	-0.878664		0.824545
UAAUAC	-2.24415	-5.5642	-3.99535	-3.0444		1.21385
UAAUAA	-0.354078	-0.128387	-0.538448	-2.43816		0.00859287
UAAGUU	-0.922288	-2.55649	-4.73739	-1.04821		2.70387
UAAGUG	-1.26436	-1.13233	-1.61643	-1.39181		1.8404
UAAGUC	0.2362	-0.0732112	-0.766362	-0.544673		0.383442
UAAGUA	-1.49197	-5.82313	-8.678	-4.09654		0.511121
UAAGGU	-0.339218	-0.368721	-0.757819	-0.600484		0.108279
UAAGGG	0.0674125	0.022227	-0.216017	-0.0948778		0.362056
UAAGGC	0.120792	-0.908893	0.165861	-0.152806		0.0392797
UAAGGA	0.165437	-0.344797	-0.444143	-0.355226		0.149399
UAAGCU	-0.0853532	-0.731795	-0.0665191	-0.434551		0.0942335
UAAGCG	0.293222	0.198405	0.0651234	-0.605668		0.256951
UAAGCC	-0.0217201	-0.668721	-0.470231	0.0203971		0.022947
UAAGCA	0.139301	-1.20743	-2.29682	-2.34635		0.206241
UAAGAU	0	-2.67024	-2.41183	-1.00812		1.98876
UAAGAG	-0.0179941	0	-0.413333	0.0595387		0.126223
UAAGAC	0.275893	-3.67693	-1.77168	-0.484234		0.238124
UAAGAA	0.898736	-2.9055	-2.2317	-3.29877		0.118146
UAACUU	-1.0863	-0.775847	-1.50198	-0.992252		2.51658
UAACUG	0.073155	-0.452862	-3.74154	-0.453744		0.249693
UAACUC	-0.22036	-0.365507	-0.939907	-0.682164		0.216265
UAACUA	0	-0.757771	-1.59282	0.119334		0.508999
UAACGU	-0.744255	-0.253307	-0.187933	-0.0428865		0.669634
UAACGG	-0.0928104	-1.02296	-0.671017	-1.16246		0.855433
UAACGC	-0.946187	0.864537	0.348432	-0.950641		0.176186
UAACGA	0	-0.0601815	-1.11561	-0.640861		1.61307
UAACCU	0.620721	-0.668721	-0.490271	0.0944838		0.651485
UAACCG	0	0	-0.581584	-1.59822		0.463894
UAACCC	0.155442	1.08241	0.221181	1.19482		0.0798338
UAACCA	-0.488278	-0.304666	0.208351	0.16708		0.249936
UAACAU	0	-4.5844	-4.38282	-2.48319		2.13104
UAACAG	0.0379125	0.107731	-0.724467	-0.325768		0.771437
UAACAC	2.09264	-1.25499	-2.06174	-0.46518		0.417106
UAACAA	0.928948	-1.01672	-0.603559	-0.0379142		0.277176
UAAAUU	-0.597735	-6.3318	-13.6028	-5.65983		0.915793
UAAAUG	-0.865314	-4.39048	-8.48922	-5.05036		2.97189
UAAAUC	-0.208827	-0.782978	-2.07321	-2.20889		0.539817
UAAAUA	-2.23448	-5.47511	-10.2713	-6.94497		0.0123641
UAAAGU	-3.25796	-1.04363	-4.31535	-2.15927		1.72659
UAAAGG	-0.719297	-0.10693	-0.743731	-0.30035		0.202915
UAAAGC	-0.573446	0.258422	-0.0370099	-0.924923		0.487531
UAAAGA	-0.397633	-1.01898	-1.06785	-1.40038		0.0174413
UAAACU	-0.54952	-1.97142	-2.52546	-0.0686241		1.19028
UAAACG	-0.810385	0.3356	0.0380207	-0.171909		0.380081
UAAACC	0.304464	-0.76368	-0.392924	-0.286517		0.0574016
UAAACA	-0.373532	-1.93967	-1.29785	-2.71611		0.439165
UAAAAU	-0.222268	-13.8319	-14.8933	-9.43874		0.515221
UAAAAG	-0.578687	-2.4665	-6.48374	-1.85572		1.16455
UAAAAC	-0.105983	-2.08038	-3.47735	-0.762313		0.118445
UAAAAA	0.307048	-6.71473	-7.29344	-8.3271		0.54285
GUUUUU	-9.71521	-5.93438	-15.0672	-8.90721		42.3828
GUUUUG	-3.84669	-1.56458	-4.99322	-6.35635		45.9039
GUUUUC	-0.746836	-1.96867	-2.34455	-0.652899		9.42825
GUUUUA	-3.01178	-4.35158	-7.65063	-2.56027		6.06699
GUUUGU	-6.3337	-3.53762	-7.1262	-7.72669		71.2167
GUUUGG	-3.22778	-2.87786	-3.31343	-1.2016		4.04519
GUUUGC	-0.892886	-1.3673	-0.698436	-0.453991		4.36612
GUUUGA	-1.17052	-2.12344	-1.4571	-1.61018		2.29479
GUUUCU	-1.10326	-1.21968	-3.83075	-1.19181		2.50602
GUUUCG	0	-0.321222	0	-0.359282		3.21732
GUUUCC	0.0146677	-0.396846	-1.47221	-0.247658		1.32411
GUUUCA	0.0670891	-0.319465	-0.314242	-1.79776		0.0769709
GUUUAU	-0.705233	-1.80641	-6.66928	-4.0636		4.04436
GUUUAG	-0.328964	-0.363486	-1.02408	-0.32444		2.15144
GUUUAC	-0.482403	-1.47126	-1.71679	-1.49333		1.23542
GUUUAA	-3.65739	-1.55546	-6.41981	-2.76182		4.06712
GUUGUU	-1.74274	-5.4437	-7.00482	-1.07011		26.2583
GUUGUG	-0.816362	-0.0758199	-1.69089	-1.24448		4.06906
GUUGUC	-0.607991	-0.0420675	0.312765	0.182306		4.80682
GUUGUA	-1.37451	-2.79847	-2.74623	-3.23424		6.66303
GUUGGU	-2.46162	-0.128469	-1.21574	-0.0600741		4.96819
GUUGGG	0.0521612	0.261577	1.58917	0.275051		0.43761
GUUGGC	-0.217476	-0.0676093	-1.60223	-0.502029		0.216321
GUUGGA	-3.60643	-1.14492	-0.181086	-0.954262		0.422667
GUUGCU	-1.53176	-0.189315	-0.576689	0		2.00148
GUUGCG	-0.625511	0	0.0568501	0.463395		0.787338
GUUGCC	-0.973229	0.0683865	0.264664	0		1.529
GUUGCA	-0.999571	-0.695533	-0.645489	-0.849839		0.439884
GUUGAU	-1.00241	-1.37026	-1.35843	-2.64674		1.4249
GUUGAG	-0.643661	-2.94219	-0.308489	-1.1023		1.75887
GUUGAC	-0.332012	-0.171372	-0.239999	0.0514818		1.79284
GUUGAA	-1.87555	-2.66027	-3.8034	-1.29701		3.43099
GUUCUU	0.444814	-0.423101	-0.712749	-0.379673		1.29783
GUUCUG	-0.427484	0	-0.167523	0.0146207		1.80128
GUUCUC	0.637318	0.366531	0.0760253	1.06788		0.490373
GUUCUA	0.699865	-0.605937	-2.17972	0		1.41757
GUUCGU	-0.946187	-0.621332	-0.721009	-0.33714		2.84797
GUUCGG	-0.226197	-0.0601815	-0.609668	-2.08169		0.608527
GUUCGC	0.577742	0	-0.137974	0.308225		0.142644
GUUCGA	-0.518546	-0.439321	-0.372803	-0.349735		0.0157423
GUUCCU	-0.0150367	0.146213	0.16983	1.02393		0.638154
GUUCCG	-0.104799	0.29275	0.303409	0.102977		0.636001
GUUCCC	0.554596	2.60417	3.43661	3.72386		0.0100545
GUUCCA	0.707256	0.514527	1.03261	0.503809		0.0111963
GUUCAU	0.117322	-1.1273	-1.19856	-1.8988		0.993856
GUUCAG	-1.28345	-0.118223	-0.302304	-1.26127		2.68199
GUUCAC	0.783734	0.204209	-0.044036	0.489923		0.12919
GUUCAA	0.0787876	-0.714354	-0.164948	-1.52607		0.168538
GUUAUU	-0.268305	-1.4239	-5.94983	-3.41534		4.01713
GUUAUG	-0.130662	-0.166993	-1.55684	-0.423583		1.34578
GUUAUC	-0.241494	-1.16779	-3.35048	-1.4191		1.98257
GUUAUA	-0.288693	-1.37928	-6.34205	-2.00674		0.768015
GUUAGU	-0.120531	-1.317	-2.96076	-2.3185		1.1265
GUUAGG	-0.358476	0.169767	-0.145322	0.313497		0.314734
GUUAGC	0.222269	0.255706	-0.74694	-0.345015		0.119593
GUUAGA	0.380588	-0.308149	-0.0674484	0.14564		0.808759
GUUACU	-0.081709	-0.913397	-0.784282	-0.608635		2.31533
GUUACG	-0.250436	-0.653645	-1.59625	-0.297499		1.07202
GUUACC	0.315981	-0.178673	0.11246	0.0780536		2.3954
GUUACA	-0.786682	-0.830711	-1.60875	-1.02531		6.53236
GUUAAU	-0.910832	-1.06915	-3.69375	-4.05308		2.63282
GUUAAG	-1.28992	-2.63878	-2.20734	-0.59328		1.58795
GUUAAC	-0.167841	0.110369	-0.975337	-0.0529629		0.7572
GUUAAA	-0.67925	-3.66522	-8.42588	-4.43624		1.87436
GUGUUU	-0.112426	-2.63844	-4.07257	-2.9499		13.245
GUGUUG	-1.02087	-0.67902	-1.43154	-2.07158		9.94795
GUGUUC	0.390921	0	-0.577538	0.10755		1.72618
GUGUUA	-0.131011	-0.566817	-2.74133	-1.05093		3.47943
GUGUGU	-9.62366	0.229965	-1.14242	-3.65745		103.83
GUGUGG	-1.26237	4.90344	1.99578	0.958455		1.36448
GUGUGC	-0.043379	0.238219	0.251357	-0.366939		4.50683
GUGUGA	-1.08349	-0.378519	0.204396	-0.13971		2.67084
GUGUCU	-1.17293	0.496097	-0.886193	0.042774		2.94473
GUGUCG	-0.640315	-1.43006	-1.13516	-1.36237		0.603626
GUGUCC	0.423899	3.63942	2.33314	2.26142		0.142994
GUGUCA	0.174315	-0.179344	-0.16409	-0.157831		0.262617
GUGUAU	-2.4609	-4.33318	-6.73785	-5.73875		10.1521
GUGUAG	-0.545589	0.1811	-0.803251	-0.993248		4.35066
GUGUAC	-3.22388	-1.28425	-1.33967	-1.21739		1.61637
GUGUAA	-0.112975	-3.23278	-0.93324	-1.8156		6.33386
GUGGUU	-0.0665162	-1.48139	-0.550026	-0.0498962		2.22843
GUGGUG	-2.22418	-0.0154366	1.46477	0		0.477157
GUGGUC	-0.23236	2.17612	1.79907	0.131204		0.44082
GUGGUA	-0.366622	-0.537272	-0.0956254	-0.79499		0.460568
GUGGGU	0.0333404	2.0808	2.45824	0.241312		1.889
GUGGGG	-0.334297	5.6241	7.67248	2.36674		0.0254651
GUGGGC	-0.279416	3.57653	3.94278	1.39896		0.0158073
GUGGGA	-0.876561	2.59184	2.97693	1.79132		0.0666281
GUGGCU	0	2.57381	1.87519	0.511974		0.633281
GUGGCG	-0.0714855	-0.037712	0.454618	-0.33451		0.100306
GUGGCC	-0.0169402	4.42353	6.83585	4.9628		0.161692
GUGGCA	-0.305625	0.0723154	-0.0168852	-0.169148		0.0820105
GUGGAU	-0.834169	-0.253983	-0.683944	-0.128087		0.251117
GUGGAG	-0.209875	2.23176	0.93163	2.03136		0.028268
GUGGAC	-0.297131	0.670784	0.263675	-0.108208		0.0169324
GUGGAA	0	-0.968784	-0.606417	-0.460368		0.538709
GUGCUU	-0.0605118	-1.16813	-0.068138	-0.926809		4.03187
GUGCUG	-1.85865	1.96683	2.88731	0.879181		1.05089
GUGCUC	-0.614636	1.64456	1.73315	0.961524		0.796428
GUGCUA	-0.18073	-0.234768	-0.182095	0.0642152		0.377106
GUGCGU	-1.00032	0.451282	0.563505	-0.199929		1.14587
GUGCGG	-0.253577	0.254037	0.200292	-0.330206		0.756806
GUGCGC	0	0.124621	-0.22984	-0.174358		0.845337
GUGCGA	-0.518546	-0.0520413	0	0.102977		2.16867
GUGCCU	-1.50596	2.17482	3.42981	4.83471		0.400886
GUGCCG	0.0398848	0.125972	0.470463	1.69353		0.28283
GUGCCC	0.205742	4.77627	4.17957	3.86391		0.0777963
GUGCCA	-0.135183	1.11687	2.78971	1.72496		0.130071
GUGCAU	-0.187816	-0.71184	-0.892784	0.10191		2.04832
GUGCAG	-1.40253	1.54792	1.11006	0.193431		0.200784
GUGCAC	0.330952	0.0871986	1.15649	0.126098		0.360161
GUGCAA	-0.0217188	-0.394303	-0.0987749	-1.12977		0.0562484
GUGAUU	-1.79731	-0.0380359	-1.03745	-0.0787171		1.50042
GUGAUG	0.437159	-0.264303	-0.0575432	-0.759954		0.444853
GUGAUC	-0.0217188	-0.171255	-0.780956	-0.432021		0.424424
GUGAUA	0.846148	-0.284587	-0.693526	-0.161903		2.62242
GUGAGU	-1.00671	-0.124643	-0.592091	0.144765		0.790362
GUGAGG	-0.546613	1.59448	0.756517	0.653639		0.291643
GUGAGC	-1.52402	1.26767	3.5103	0.650358		1.37323
GUGAGA	0.464514	0	-0.407404	0.0514583		0.128615
GUGACU	0.570611	0	0.281075	0.0893073		0.207485
GUGACG	-0.720856	-0.269382	-0.208077	-0.854033		0.433201
GUGACC	-0.0377959	1.22373	3.11953	1.18935		0.0519477
GUGACA	0.41158	0.656221	0.320433	-0.347334		0.0582095
GUGAAU	0.609529	-2.98423	-2.6463	-1.37687		0.776176
GUGAAG	-1.35072	-0.0701429	-0.0168852	-0.859111		1.02894
GUGAAC	-0.276966	-0.742097	-0.23304	-0.648896		0.0741767
GUGAAA	-1.97984	-1.57891	-2.43864	-4.0481		0.289328
GUCUUU	-1.93285	-1.18996	-1.51302	-1.89165		4.8007
GUCUUG	-0.970412	-0.430335	-0.14115	0.0363062		3.61445
GUCUUC	-0.0825312	-0.339417	0.172496	-0.313299		1.03206
GUCUUA	-1.66728	0.484808	-0.0620306	-0.574552		1.4895
GUCUGU	-2.06914	0.459435	-0.352742	0.17761		29.1837
GUCUGG	-0.667086	0.457542	2.85092	0.58673		0.0801662
GUCUGC	0.802611	0.703551	0.788104	0.581233		0.962162
GUCUGA	-0.0721529	-0.449146	-0.348691	-0.763359		0.949041
GUCUCU	0.556828	1.20587	1.9242	1.51293		2.64015
GUCUCG	-0.256828	-1.10265	0	-0.188261		2.26548
GUCUCC	0.0862735	4.45106	4.30729	2.90404		0.476784
GUCUCA	1.32695	1.09113	0.632804	1.34907		0.37583
GUCUAU	0.708951	-2.33458	-1.82814	-2.39948		1.41257
GUCUAG	1.12177	0.491681	0.429014	2.28372		0.40902
GUCUAC	0.291191	0.174624	0.693478	0.954423		0.00662261
GUCUAA	0	-1.49955	-2.02242	-0.474433		1.18932
GUCGUU	-0.559048	-1.45979	-1.98685	-1.85778		1.39972
GUCGUG	0.0916854	0	-0.0447685	-0.0451386		0.825751
GUCGUC	-0.988626	0.0487875	0.940477	0.334877		0.914309
GUCGUA	-0.237843	-1.84209	-1.25651	-2.15417		1.66491
GUCGGU	-0.720856	-0.217889	0	0.0484595		0.159744
GUCGGG	0.0943491	1.18078	0.604585	0.485895		0.0877738
GUCGGC	-0.237843	0.123431	0.327163	0.177715		0.23141
GUCGGA	-1.14112	-0.482137	1.0013	-0.0973585		0.0693028
GUCGCU	-0.463228	-0.484031	0.267365	-0.0850834		0.685457
GUCGCG	0.118746	0.34006	0.129197	0		0.462011
GUCGCC	-0.815461	0.668984	0.726644	0.252591		0.270355
GUCGCA	-0.416077	-0.0644704	0.713006	0.388587		0.499715
GUCGAU	0.176169	-0.862998	0.191707	0.140522		0.936897
GUCGAG	-0.325018	-1.20636	-0.0510079	-0.480377		0.0738692
GUCGAC	0.152021	-0.837061	-0.0658765	-0.0675907		1.82441
GUCGAA	-0.0601245	0	-0.235747	-0.420752		0.247244
GUCCUU	0.265838	0.235485	0.385308	1.31542		1.2599
GUCCUG	-0.263264	4.36649	2.48764	2.71989		0.133209
GUCCUC	0.162421	2.65075	5.46774	3.96821		0.417841
GUCCUA	0	0.328901	1.01952	0.0724191		0.0778176
GUCCGU	-1.03954	0.136498	0.186168	-0.0877341		4.4224
GUCCGG	-0.610215	0.361723	0.187619	0		0.064203
GUCCGC	-0.191829	2.20528	0.91053	1.97735		0.525305
GUCCGA	-1.39397	-0.248469	0.466387	-0.717435		0.00626844
GUCCCU	1.5008	10.8836	4.69909	1.5594		0.416665
GUCCCG	-0.538251	0.222463	0	0.165336		0.0573549
GUCCCC	1.76803	3.33236	2.90558	1.57473		0.212771
GUCCCA	0.959712	4.8671	6.93362	2.83693		0.000734679
GUCCAU	0	0.166846	0.34976	1.31981		0.169722
GUCCAG	0.0175239	1.40265	2.77101	1.20029		0.156606
GUCCAC	0.310861	2.93088	4.73591	3.0591		0.221383
GUCCAA	1.04928	0.166703	0.603622	-0.104943		0.0344895
GUCAUU	-0.574822	-0.595405	-2.27381	-0.498753		1.15939
GUCAUG	-0.261139	-1.20302	-0.194028	-0.425343		1.433
GUCAUC	0.0893253	0.527632	1.01004	0.599454		0.10072
GUCAUA	0.876142	-0.490608	-1.24679	-0.344218		0.517273
GUCAGU	-2.36849	-0.272393	-0.379478	0.239075		1.97329
GUCAGG	-0.260564	0.186515	1.37916	1.22598		0.00945691
GUCAGC	-0.562548	1.68346	1.43746	2.30523		0.795178
GUCAGA	0.810321	0.433187	-0.0179306	0.230045		0.0459104
GUCACU	-0.0545471	0.0177002	0.223785	0.536281		0.0061769
GUCACG	-0.977425	0.0909789	0.90949	-0.0422564		0.361393
GUCACC	0.955769	1.05784	4.19328	1.37713		0.392714
GUCACA	-0.513888	0.530617	0.352638	0.655665		0.0211111
GUCAAU	2.78207	-0.230677	-1.1878	-0.117139		0.788
GUCAAG	-0.063982	-0.0215829	-0.12144	-0.478866		0.0141027
GUCAAC	0.0556564	-0.179951	-0.154769	-0.0267643		0.456176
GUCAAA	-0.240008	-1.89199	-1.13177	-1.42553		0.245625
GUAUUU	-3.15136	-5.60581	-11.1417	-3.98742		3.66431
GUAUUG	-1.09901	-2.63571	-1.29045	-1.64482		1.45517
GUAUUC	0.634192	-1.96499	-0.255917	-1.47413		0.590937
GUAUUA	-0.254135	-1.92795	-1.81254	-1.62684		2.8812
GUAUGU	-2.57456	-0.643152	-1.38582	-2.81104		9.73202
GUAUGG	-0.481055	-0.472512	-1.12412	-0.260479		0.858708
GUAUGC	0.302833	-0.18543	-0.706938	-0.310523		1.77654
GUAUGA	0.0643366	-0.898484	-1.618	-0.732576		0.0904437
GUAUCU	0.467284	-1.38856	-1.08968	-0.690544		1.4663
GUAUCG	-0.416135	0	-0.328561	-1.00396		0.468764
GUAUCC	0.108414	-0.40408	-0.778128	-1.00381		0.0126546
GUAUCA	0.553424	-1.01061	-0.793119	-2.30278		1.08134
GUAUAU	-3.00209	-7.18865	-13.5941	-8.76551		2.73717
GUAUAG	-1.16547	-2.07283	-0.901763	-1.31934		0.494505
GUAUAC	0	-0.390026	-0.998961	0		0.0197106
GUAUAA	-1.57003	-4.64643	-9.93485	-3.03914		2.56291
GUAGUU	0	-1.48248	-6.19819	-2.10812		3.41654
GUAGUG	-0.522831	0.0245181	0.0502299	0		1.56912
GUAGUC	-0.61947	0.2298	-0.370576	-0.117175		0.324451
GUAGUA	-1.33842	-0.423866	-2.87288	-0.0560627		1.66024
GUAGGU	0.477548	-0.307283	-0.233283	-0.879681		1.85282
GUAGGG	0.0701663	1.99565	1.04617	1.70938		0.227526
GUAGGC	0.0504086	0.192036	-0.811728	0.301322		0.882373
GUAGGA	-0.14907	0.449124	0.807618	1.12893		0.834576
GUAGCU	-0.351343	-0.111739	-0.0628188	-0.74041		2.67137
GUAGCG	0	0.252849	0	-0.0518749		3.20355
GUAGCC	-1.06242	1.05635	-0.12144	-0.119522		0.16233
GUAGCA	-0.322379	-0.478232	0.623173	0.224266		1.70223
GUAGAU	-0.710615	-0.681948	-2.64243	-1.30707		2.64931
GUAGAG	0.0586053	-0.346863	-0.836466	-0.467318		0.503257
GUAGAC	0.32464	2.31215	0.474567	0.0956299		0.124102
GUAGAA	0.4866	-2.00267	-1.52808	0.23405		2.29169
GUACUU	-0.97001	-1.60499	-1.35259	-2.36238		0.836308
GUACUG	-0.740484	-0.217982	-0.433699	-0.549793		0.69786
GUACUC	-0.20661	-0.593432	-1.12665	-1.30111		0.486041
GUACUA	-0.61807	-1.83676	-0.734347	-0.238231		1.55786
GUACGU	-0.139587	-0.784421	-0.33452	-0.311858		2.93928
GUACGG	0.370876	0.125843	-0.0686635	0.259529		0.145325
GUACGC	-1.28845	-0.837061	-0.236744	-1.00396		0.47135
GUACGA	0.313342	0.132938	0	0		0.129374
GUACCU	-0.45799	0.17694	0	0.400696		0.487675
GUACCG	-0.381831	1.16785	0.273932	0		0.472086
GUACCC	0.0256302	1.57486	3.2195	0.952198		0.0546819
GUACCA	0.0224333	0.0723118	0.161876	0.402557		0.279985
GUACAU	-1.81158	-2.76872	-5.37703	-2.52162		1.64965
GUACAG	-2.55793	-1.15255	-1.57261	-0.751416		1.76603
GUACAC	0.099512	-1.06946	-0.0836691	-1.40089		0.567658
GUACAA	0	-3.4146	-1.99093	-0.70346		1.58367
GUAAUU	-0.120033	-3.17601	-7.18012	-4.02094		0.958131
GUAAUG	-0.192174	-0.181172	-0.678534	-1.25625		2.98847
GUAAUC	0.837214	-0.245512	0.134065	0.535349		0.605159
GUAAUA	-2.18167	-2.35561	-2.82474	-2.22837		1.39914
GUAAGU	-2.15155	-2.25062	-2.0626	-1.52577		1.77523
GUAAGG	-0.0990524	-0.0507451	0.228461	0.458589		0.0500692
GUAAGC	-0.107547	-0.110559	0.11246	0		0.901882
GUAAGA	-1.00241	-1.42178	-1.59784	-1.76635		1.97208
GUAACU	-0.341507	-2.47518	-3.57064	-1.16489		1.22607
GUAACG	-0.0472317	-1.20636	-0.415043	-1.76415		1.05614
GUAACC	0.166389	0	0.0266926	0.0803617		1.12353
GUAACA	0.398378	0.114395	-0.631399	-1.08344		0.951535
GUAAAU	-4.87537	-10.5234	-11.5864	-9.24926		1.81498
GUAAAG	-1.52474	-2.34639	-1.49855	-1.49464		0.252889
GUAAAC	-0.475913	-1.73782	-1.32887	-1.46421		1.65916
GUAAAA	-0.297796	-8.65763	-8.06274	-6.38882		0.344052
GGUUUU	-4.39743	-1.2454	-3.68159	-1.83096		18.671
GGUUUG	-2.58246	-2.11565	-1.85182	-1.39969		1.29286
GGUUUC	-0.186859	0.202009	-0.870567	-0.798687		1.01395
GGUUUA	0.104668	-0.939499	-2.26097	-0.922607		0.314514
GGUUGU	-2.91269	-0.328241	-1.83863	-1.03709		1.56489
GGUUGG	-0.335942	-0.0778863	0.0374088	0.117699		0.145964
GGUUGC	-0.866517	0.0490745	1.03547	0.417162		0.483457
GGUUGA	-0.0460262	-0.331385	0.472204	0.355619		0.509503
GGUUCU	0.689034	0.237563	0.114306	0.315845		0.2019
GGUUCG	-0.555492	-0.474559	0	-0.373921		0.139663
GGUUCC	0	2.3687	2.29274	2.20923		0.156052
GGUUCA	1.15831	-0.595596	-0.044036	0		0.193711
GGUUAU	0.0732757	-0.401067	-4.10393	-0.631899		1.53035
GGUUAG	0.0983354	0.454532	-0.0787205	-0.0819325		0.716349
GGUUAC	-0.0905092	-0.305295	-0.484736	-0.0286274		1.93898
GGUUAA	-1.70922	-0.497778	-0.942846	-0.883983		2.50436
GGUGUU	-0.89348	0.40168	-0.351451	-0.255842		2.08258
GGUGUG	-1.20682	0.524998	1.44553	0.343011		2.12937
GGUGUC	0.702428	1.71684	0	0.550297		0.223462
GGUGUA	-1.01992	-0.152891	-0.126844	0.644359		1.33958
GGUGGU	-0.320066	-0.282765	0.544824	-0.500969		0.82105
GGUGGG	0.267186	6.28353	8.09471	2.78407		0.0722366
GGUGGC	0.0170295	1.73724	2.70901	2.38511		0.0949509
GGUGGA	0.0602346	0	0.168903	0.746085		0.156645
GGUGCU	-0.280927	3.63491	4.50527	4.58925		0.00294468
GGUGCG	0.470158	0.385614	0.639825	-0.5928		1.04632
GGUGCC	-0.621525	1.16517	1.96681	1.04979		0.0599702
GGUGCA	-0.0215461	0.805299	2.57902	0.366759		0.181747
GGUGAU	0.345825	-0.279479	-0.389491	0		0.15246
GGUGAG	-0.297091	0.826885	0.63513	0.165174		0.13059
GGUGAC	0.0578366	0.148744	0.618784	0.27738		0.0490431
GGUGAA	0.67379	-1.07584	-0.142028	-0.0868733		0.0549274
GGUCUU	-0.228269	1.06682	1.33758	0.159584		1.55875
GGUCUG	-0.0530463	0	1.37997	0.223687		0.645046
GGUCUC	-0.281292	0.865898	1.94127	1.06144		0.132424
GGUCUA	0.338643	-0.0831447	0.053629	0.516766		0.118387
GGUCGU	-1.05976	-1.17803	-1.99495	-0.10831		0.106116
GGUCGG	-1.2607	-0.0447938	0.146683	-0.368887		0.259642
GGUCGC	-0.555492	0.601761	2.12935	2.0157		0.0766049
GGUCGA	0.918969	-0.0672895	-0.235747	-0.0627839		0.0722553
GGUCCU	1.84967	3.13738	3.27398	3.13773		0.00148303
GGUCCG	-0.404385	0.79849	2.42138	0		0.360069
GGUCCC	2.28766	8.02855	6.08305	3.90363		7.65e-05
GGUCCA	0.021958	2.64784	5.12574	3.49221		0.525504
GGUCAU	-0.686389	0.0223758	0.0470467	0.718771		0.0336763
GGUCAG	-0.0757954	1.24803	1.37189	2.78504		0.0613211
GGUCAC	-0.386107	0.788669	2.08261	1.99122		0.0364928
GGUCAA	1.09027	-0.0253617	-0.08085	0.521187		0.0280359
GGUAUU	-0.351343	-1.47189	-0.604817	-1.86544		0.0305694
GGUAUG	0.128907	-0.0519757	-0.116078	-0.111289		0.429214
GGUAUC	0.696987	-0.166718	-0.0624038	-1.11482		0.00828223
GGUAUA	0.0800979	-1.10848	-0.683291	-0.194446		0.643694
GGUAGU	-0.165913	-0.558127	0.0874141	-0.373399		1.42737
GGUAGG	-0.263886	0.843823	0.0489091	1.29994		0.44838
GGUAGC	-0.0796672	0.559601	0.678248	0.515072		0.754197
GGUAGA	-0.0436543	-0.0230672	0.100727	0.264099		0.202995
GGUACU	0	-0.690761	0.270984	-0.380879		0.606267
GGUACG	-0.30688	-0.0672895	0.34262	0.401566		0.396724
GGUACC	-0.108189	1.33081	0.398676	0.142889		0.0029957
GGUACA	-0.28893	-0.276382	1.08782	-0.050044		0.794866
GGUAAU	0.299891	-0.274669	-1.63786	-1.29288		0.448991
GGUAAG	-2.00211	-0.350006	0.115635	0.0541501		1.53983
GGUAAC	-0.739811	-0.0861521	-0.158747	-0.516669		1.43048
GGUAAA	-0.62515	-1.26727	-1.24297	-0.790272		0.44221
GGGUUU	-3.14454	-0.356317	-0.358441	-0.275282		2.93639
GGGUUG	-0.101243	0.174089	0.79821	0.539502		0.133943
GGGUUC	1.01595	2.31729	0.793931	1.7594		0.0111163
GGGUUA	0.0239657	-0.0536596	-0.667297	-0.141575		1.29669
GGGUGU	-1.22603	1.6467	1.48876	0.571164		1.75399
GGGUGG	-0.437563	3.79044	5.95635	1.26408		0.758593
GGGUGC	0.711134	4.04023	9.6965	4.83041		0.14271
GGGUGA	0.297003	1.73479	1.08055	0.154477		0.602128
GGGUCU	-1.29313	1.37676	2.73367	0.581233		0.732147
GGGUCG	-0.461789	0	0.152905	0.094779		0.0141193
GGGUCC	3.04574	5.09415	5.77144	4.2407		0.238174
GGGUCA	0.846165	2.46126	3.16305	6.71139		0.00646102
GGGUAU	0.810037	-0.944052	-0.481291	-1.23118		0.157355
GGGUAG	-0.374383	0	1.03569	-0.257869		0.0825918
GGGUAC	0.799064	1.09333	1.63171	1.54634		0.340679
GGGUAA	0.157472	-0.356216	-0.111877	0.276032		0.28979
GGGGUU	0.0182767	0.0770628	-0.227661	0.0758696		0.484252
GGGGUG	-0.523344	3.80977	5.22913	1.84285		0.301202
GGGGUC	0.435854	4.26406	7.54486	4.04858		0.0809397
GGGGUA	0	-0.0519757	0	1.09133		0.0915349
GGGGGU	0.0783824	1.12337	3.0371	0.886138		0.0835099
GGGGGG	0.300187	2.3247	1.9429	0.079648		1.57271
GGGGGC	0.946471	6.08266	5.48352	4.31208		0.000168803
GGGGGA	0.287923	1.13791	2.11255	0.0885167		0.0520827
GGGGCU	0.664637	9.9913	8.18373	9.97302		0.00033433
GGGGCG	-0.343917	0.806728	1.21635	-0.133609		0.0466176
GGGGCC	-0.0587136	12.0244	11.1768	10.4136		0.000513308
GGGGCA	0.152764	3.40601	3.40103	1.62908		0.00340803
GGGGAU	-0.211245	2.89115	2.6926	1.63026		0.0542122
GGGGAG	-0.508574	2.49182	4.05639	0.767192		0.233709
GGGGAC	0.734362	1.99049	4.86465	2.49803		0.0232321
GGGGAA	-0.424681	-0.249479	0.0683394	-0.015561		0.165904
GGGCUU	0.165224	1.35286	2.23026	1.98356		0.192067
GGGCUG	0.0271423	7.29326	11.1091	8.1315		1.58e-05
GGGCUC	0.309798	8.85077	10.719	6.72426		0.000430784
GGGCUA	1.44799	2.46603	2.73362	0.952198		0.0036804
GGGCGU	-0.0374982	0	0.55787	0.232114		0.43914
GGGCGG	-0.139804	3.59657	5.2108	0.830513		0.00586131
GGGCGC	-2.38236	-0.896953	-0.0416412	-1.19642		0.963373
GGGCGA	-0.0491766	0.100459	0.475383	0.155091		0.326396
GGGCCU	-0.963673	5.93538	10.3839	5.61593		9.39e-07
GGGCCG	-0.718328	0.900049	1.81096	2.28631		0.408904
GGGCCC	0.0840595	9.86621	10.7805	6.38679		0.000559423
GGGCCA	0.502757	6.30166	6.20187	7.26147		0.00630018
GGGCAU	1.46977	1.12508	0.42436	2.46606		0.000152399
GGGCAG	-0.218386	6.07719	8.16579	2.73189		0.00156426
GGGCAC	0.205507	1.66396	1.44033	0		0.00282932
GGGCAA	0.551578	0.238793	0.933674	0.341194		0.0190233
GGGAUU	0.561838	0.23916	-0.38303	-0.264009		0.335081
GGGAUG	0.505645	3.00529	5.71297	0.711114		0.00396666
GGGAUC	0	2.58061	4.23414	1.59791		0.293266
GGGAUA	0.264044	0.294548	0.110953	1.65078		0.0112775
GGGAGU	-0.375012	0.531706	0.264732	-0.658662		0.0624558
GGGAGG	-0.574234	4.81412	5.41915	0.532995		0.103579
GGGAGC	-0.396412	1.68309	2.30113	2.23177		0.0561412
GGGAGA	1.0912	1.45297	2.11379	0.551038		0.00222845
GGGACU	-0.640211	1.0861	1.14843	1.56028		0.0986487
GGGACG	-0.346102	1.46659	0.717486	-0.210116		0.0777245
GGGACC	0.420059	2.93901	5.32613	2.47265		0.0171187
GGGACA	1.65655	1.94681	4.61395	4.09661		0.0636746
GGGAAU	0.2248	-0.162581	0.0427593	-0.95434		0.0279351
GGGAAG	-0.615288	0.175793	3.36449	0.60078		0.00849534
GGGAAC	0.019507	0.0833439	0.54554	0.126098		0.0544396
GGGAAA	-0.457403	-0.535449	0.0146303	-0.201817		0.0628551
GGCUUU	-0.57211	0.253833	-0.153821	-0.0305856		2.12973
GGCUUG	-0.176019	0.941954	1.22259	1.19899		0.11084
GGCUUC	0.7356	0.236027	0.109403	0.180343		0.0152827
GGCUUA	0.168518	2.38332	1.55685	2.12394		0.0837925
GGCUGU	-0.415595	5.17715	5.75766	1.13262		0.340344
GGCUGG	0.026086	9.31911	9.48194	4.45641		0.000475726
GGCUGC	-1.31644	5.31813	7.15187	8.28071		0.009736
GGCUGA	0.558887	0.485749	2.2435	1.6582		0.0110793
GGCUCU	-0.151193	3.18067	4.16607	3.93195		0.158097
GGCUCG	-0.0842673	0.133291	0.533704	-0.251663		0.258365
GGCUCC	0.82486	8.96022	9.15296	6.97992		0.0149586
GGCUCA	0.723362	1.35213	2.47084	2.31924		1.36e-08
GGCUAU	0	1.05874	0.25029	-0.790742		0.0224246
GGCUAG	0.447426	1.58163	0.0959003	0.0450372		0.120149
GGCUAC	0.529882	1.25402	0.843626	1.01709		0.0360176
GGCUAA	0.448286	-0.0516784	-0.385268	0.206213		0.000674461
GGCGUU	-0.0786045	-0.263888	0.192886	-0.143394		1.78139
GGCGUG	-1.03455	0.194529	0.493031	0.108902		0.0264027
GGCGUC	0.94982	1.30111	0.923223	1.18391		0.246352
GGCGUA	-0.0601245	-0.999606	-1.16804	-0.136544		1.05592
GGCGGU	0.33913	1.90056	1.92737	1.60745		0.0427012
GGCGGG	-0.534699	0.796085	2.4568	0.266963		0.0855495
GGCGGC	0.314858	0.463543	2.0019	0.408306		4.28e-05
GGCGGA	-3.40043	-0.0457005	0.283428	-0.134259		0.0833494
GGCGCU	0.0460308	0.0416619	0.57099	0.0393995		0.83375
GGCGCG	-2.60822	-0.400615	0.580513	-1.37151		0.611098
GGCGCC	-0.599116	0.0407567	0.881255	-0.140847		0.215263
GGCGCA	-0.438892	0.385614	0	-0.531792		0.0734668
GGCGAU	0.775951	0.420097	-0.346202	0.699563		0.194823
GGCGAG	-1.06027	0.436856	0.246732	-0.124798		0.0787561
GGCGAC	0	0.0550327	0.0503885	0.111153		0.750648
GGCGAA	-0.53654	-0.367973	0.400108	-0.240368		0.209962
GGCCUU	-0.0319701	0.394277	0.803313	1.13524		0.213904
GGCCUG	-2.54658	6.51885	10.8957	4.37715		0.000888395
GGCCUC	-0.0658956	4.77128	15.8187	6.15213		0.000271221
GGCCUA	-0.279469	0.263643	0.758595	0.104125		0.0480126
GGCCGU	-0.253344	0.272392	0.352289	0.328925		1.44494
GGCCGG	-0.927332	0.60646	2.5532	1.60883		0.0919003
GGCCGC	-0.652758	2.36802	2.12359	2.72347		0.0132694
GGCCGA	-0.100277	1.08828	0.827253	1.39339		0.186011
GGCCCU	0.358684	8.69786	10.4378	6.4261		0.00234663
GGCCCG	0.0783044	2.79451	2.18194	0.493891		0.089372
GGCCCC	0.228258	3.79159	5.69339	8.03766		1.96e-05
GGCCCA	0.513496	4.00668	7.63636	3.72878		1.81e-05
GGCCAU	0.316716	1.05997	0.496753	0.146823		0.0153954
GGCCAG	0.660984	8.92678	11.2032	7.44943		1.29e-05
GGCCAC	0.359564	6.0063	7.29731	7.93822		0.0758395
GGCCAA	0.157468	0.422149	1.05138	0.576229		0.00345827
GGCAUU	0.292682	0	-0.760322	0.0402832		0.198045
GGCAUG	1.16549	-0.0620835	-0.557693	0.0573273		0.00469916
GGCAUC	0.603077	0.0206496	0.954042	1.15538		0.000554149
GGCAUA	0.718473	-0.0267038	-0.0529226	-0.140668		0.00294543
GGCAGU	-0.186056	0	2.94247	1.50527		0.23961
GGCAGG	1.12789	4.62347	7.16398	3.11818		0.000600786
GGCAGC	-0.657259	2.73023	5.88112	3.62979		0.000164217
GGCAGA	-0.114941	1.57366	0.608708	0.288889		0.000187143
GGCACU	-0.652799	-0.185965	-0.388411	0.103122		0.000621816
GGCACG	0.405816	0.500522	0.142929	-0.636311		0.0397317
GGCACC	0.0925026	2.30666	5.03542	0.704401		0.0544973
GGCACA	0.574549	-0.142756	0.896767	0.420082		0.00311582
GGCAAU	1.19261	-0.506518	0.115635	-0.447152		0.116905
GGCAAG	0.323187	1.89404	1.97394	0.0970754		0.00555517
GGCAAC	1.33189	0.116992	-0.0569032	0.263454		0.133239
GGCAAA	0.607535	-0.29459	-0.866706	-1.93123		3.18e-05
GGAUUU	-0.49996	-0.313685	-2.25666	-1.93525		1.41706
GGAUUG	-0.841052	0.0742514	-0.24807	-0.426872		1.00396
GGAUUC	0.0970984	0.158407	0.258454	0.149745		0.0415957
GGAUUA	0	0.188974	-0.0993313	-0.380879		0.944583
GGAUGU	0.0512827	0.0976807	0.817075	0.295586		0.624186
GGAUGG	0.0893904	1.48718	1.24043	1.04943		0.000415627
GGAUGC	0.834431	0.274955	0.767922	0.062603		0.00184958
GGAUGA	0.184612	1.59591	0.522187	0.241353		0.0101271
GGAUCU	-1.03309	0	0.580006	0.951487		0.222827
GGAUCG	-0.946187	0.125843	0	0		1.01729
GGAUCC	0.0970984	0.464435	1.59128	0.532505		0.0569658
GGAUCA	0.0741521	0.481374	1.10036	0		0.0192958
GGAUAU	0.722614	-0.512039	-0.530232	-0.0768829		0.154324
GGAUAG	0	1.77989	1.2201	0.512337		0.122769
GGAUAC	-0.0272089	-0.683972	-0.542637	-0.0601986		0.000985857
GGAUAA	0.769052	-0.564886	0	-0.420892		0.0264647
GGAGUU	-0.581572	0.328471	-0.180327	-1.60067		0.353422
GGAGUG	-3.26895	0.880405	0.350911	0.0935117		0.0169199
GGAGUC	0.853554	1.44724	2.99139	1.80806		0.0080142
GGAGUA	0	0.81732	0.246645	0.248085		0.561507
GGAGGU	0.304938	0.809332	1.75779	0.715579		0.0435471
GGAGGG	0.041408	5.34501	3.61957	2.82175		0.0175541
GGAGGC	0.531891	4.0612	3.84271	2.58943		0.0278714
GGAGGA	0.091389	2.8022	3.86624	1.2422		0.000233158
GGAGCU	-0.103732	0.629625	2.73705	0.662832		0.108121
GGAGCG	-0.828484	0.03374	0.937618	-0.193268		0.247534
GGAGCC	-1.00627	6.45479	6.87897	9.24795		1.75e-05
GGAGCA	-0.0518015	3.10529	3.36985	1.55052		0.00312823
GGAGAU	3.71881	0.980358	0.523353	0.0396917		0.00351142
GGAGAG	-0.0920114	1.48787	2.97031	-0.160392		0.000296605
GGAGAC	0.0922207	0.111599	0.77246	0		0.004443
GGAGAA	0.565738	0.310095	0.577185	-0.232057		0.000262864
GGACUU	-2.66536	0.0749991	0.037101	0.834146		0.133941
GGACUG	-0.0881408	0.185605	0.0935693	0.0854353		0.0996641
GGACUC	-0.928537	1.78441	0.920707	1.59194		0.00986569
GGACUA	-0.143715	-0.0278543	0.23256	0.401646		0.0055134
GGACGU	-1.06133	0.133291	0	0.139102		0.108821
GGACGG	-2.01744	0.351712	-0.63147	-0.381739		0.230923
GGACGC	-0.652714	0	-0.455696	0		0.490574
GGACGA	0.048127	-0.508489	0.365397	-0.191394		0.289105
GGACCU	-0.810922	4.11745	4.05559	3.44744		0.000479788
GGACCG	0.380496	0.273824	0.55104	0.195018		0.0139162
GGACCC	0.0403835	1.69118	5.90445	1.04571		0.000439879
GGACCA	1.57087	1.52803	4.71677	1.63657		0.0145762
GGACAU	0.25967	-0.279088	-0.784282	0.168268		0.0435797
GGACAG	0.646176	4.94103	6.24357	5.28349		1.09e-07
GGACAC	0.51467	1.07473	2.53347	3.92112		0.000494727
GGACAA	1.40674	0.54434	2.15325	0.383286		0.00999663
GGAAUU	-0.402015	-3.56393	-1.72208	-2.84124		0.371156
GGAAUG	-0.112	0.0571267	-0.0583573	-1.26994		0.00185553
GGAAUC	2.25013	0.285413	-0.126844	-0.0221134		0.0548554
GGAAUA	0	-0.405236	-0.211129	-0.366901		0.0352991
GGAAGU	-0.483822	-1.32043	-0.414904	0.292495		0.3659
GGAAGG	0.75621	1.51302	4.2663	1.13356		0.0632026
GGAAGC	0.408635	1.00352	1.20368	0.295676		0.00573386
GGAAGA	-0.992941	-0.014161	0.0135765	0.120833		0.00034478
GGAACU	-0.498418	0.200615	0.0939835	0.0342931		0.115432
GGAACG	-0.436791	-0.790508	2.18318	0.346555		0.299822
GGAACC	2.0706	1.45265	2.10036	-0.419727		0.0258069
GGAACA	-0.233527	0.162124	0.714747	0.364398		0.00517545
GGAAAU	-0.244033	-1.1063	-3.77048	-1.90871		0.0339774
GGAAAG	-0.321167	0.0281883	0.168176	0.279107		0.24386
GGAAAC	0.835476	-0.570909	-0.429271	-0.961908		0.0062632
GGAAAA	-0.316387	-0.593737	-0.33158	-0.490794		0.0938106
GCUUUU	-3.04271	-2.41833	-3.05686	-1.34447		5.11619
GCUUUG	-1.09089	0.060481	-0.330806	0.377786		2.6627
GCUUUC	0.537206	-0.941566	-0.190589	-0.304506		2.35168
GCUUUA	-0.866893	-0.281098	-2.27136	-0.303611		1.32884
GCUUGU	-0.0505163	-0.154843	-0.136379	-0.180539		1.62398
GCUUGG	-1.32017	1.39151	2.30113	2.24664		0.215009
GCUUGC	-0.512543	0.822574	0.38178	2.00188		1.05133
GCUUGA	-0.197886	0.0666342	-0.23173	0		1.41416
GCUUCU	0.0425167	0.392271	0.658531	-0.390418		0.0631925
GCUUCG	-0.123541	-0.239706	0.0387734	-0.857283		0.13342
GCUUCC	0.710631	0.0462403	3.59697	1.26763		0.333337
GCUUCA	0	-0.0364502	-0.941495	0.200596		0.469433
GCUUAU	1.0109	-1.17361	-1.07712	-0.237783		1.11199
GCUUAG	-0.377009	0.643776	0.0940216	0.653931		0.315545
GCUUAC	0.444986	0.0859731	-0.120747	0.513203		0.12037
GCUUAA	-0.799912	-0.585034	-0.839744	-0.335743		1.28003
GCUGUU	-1.58077	0.638669	0	-0.71603		2.44467
GCUGUG	-0.13609	2.35044	4.54176	1.15046		0.336396
GCUGUC	-1.46845	0.332252	1.96151	0.451263		0.317867
GCUGUA	0.251246	0.840372	0.144445	0.374017		1.33215
GCUGGU	-0.719793	2.01876	2.6588	1.679		0.779875
GCUGGG	0.433138	8.89163	11.1729	5.86756		3.32e-05
GCUGGC	-0.653335	3.407	2.16535	2.43448		0.00440197
GCUGGA	-0.618814	3.15189	3.91243	2.78968		1.13e-05
GCUGCU	-0.0662142	3.34475	2.18758	4.10781		0.168626
GCUGCG	-0.767104	0.953065	0.511316	1.38932		0.0579291
GCUGCC	-1.35969	5.68337	6.66515	7.08927		0.152154
GCUGCA	-0.676391	0.395297	1.61875	1.95164		1.38e-05
GCUGAU	0.402108	-1.68848	-0.406759	-1.27725		0.034136
GCUGAG	0.883001	2.0476	3.15016	2.67153		0.00232264
GCUGAC	-0.104078	1.73619	0.876136	1.03877		0.18676
GCUGAA	-0.356612	-0.0346635	0.88156	0.331816		0.000357396
GCUCUU	0.174535	0.408184	0.200121	0.323478		0.676125
GCUCUG	-0.0379821	5.14737	6.59483	3.43625		0.357464
GCUCUC	0.482054	0.831149	3.44373	1.04086		0.0326504
GCUCUA	-0.203052	0.416427	0.641774	0.559407		0.930067
GCUCGU	-0.147038	0.330164	0.108813	0.485393		1.13563
GCUCGG	-0.382724	0.204402	0.128926	-0.0388297		0.211013
GCUCGC	-0.612669	0.507243	-0.0862413	-1.43387		0.252203
GCUCGA	0.333719	0.103387	1.13775	0.314771		0.0737616
GCUCCU	0.475687	7.08374	3.59099	2.80308		0.0104162
GCUCCG	0	1.2836	1.04529	2.7747		0.00540623
GCUCCC	0.359564	5.85308	13.0003	7.62435		0.0135544
GCUCCA	2.83662	5.7608	4.13794	5.29427		0.0211019
GCUCAU	-0.731336	-0.1338	-0.303996	-0.109078		0.0394083
GCUCAG	0.107488	0.885263	1.34278	1.3492		0.000806452
GCUCAC	0.288323	0.995715	1.24245	0.850998		7.6e-05
GCUCAA	0.192961	-0.0748202	0.972272	0.282011		9.04e-05
GCUAUU	0.717997	-0.361523	-0.596825	-0.695026		1.20497
GCUAUG	0.0869887	0.211123	-0.022389	-0.453065		0.0287647
GCUAUC	-0.0837577	0.442696	0.256606	0.126173		0.0538335
GCUAUA	0.808723	-0.316185	-0.363613	0.0837999		0.160661
GCUAGU	-0.503744	0.514048	0.323347	0.194256		0.92579
GCUAGG	-0.710615	0.616766	0.696571	0.0655069		0.195785
GCUAGC	0.0748234	0.0782858	-0.374487	0.0727013		0.0907423
GCUAGA	-0.263908	-0.589667	0.129276	-0.315096		0.852195
GCUACU	-0.145599	0.376487	0.265019	0.922513		0.110459
GCUACG	0.221607	-0.650582	-0.795155	-1.07477		0.0891255
GCUACC	0.137424	0.0810982	0.205926	1.11205		0.000309138
GCUACA	1.94984	0.0397125	0.513439	0.018822		0.00176996
GCUAAU	0.0945634	0.0244263	-0.371896	-0.160203		0.0226834
GCUAAG	0.0210137	-0.0976969	-0.293961	-0.488893		0.0501431
GCUAAC	0.794466	1.01575	-0.128254	0.263454		0.0279521
GCUAAA	-0.174142	-0.863108	-1.15023	-0.557304		0.447947
GCGUUU	-0.24136	-0.0371896	0.778644	0.124162		3.64985
GCGUUG	-0.559048	-0.393462	-0.41972	-0.214124		0.381333
GCGUUC	-0.280344	-2.27388	0.685142	-1.81371		3.34928
GCGUUA	-1.09841	-2.37985	-0.463848	0		0.48812
GCGUGU	-1.75767	0.401597	0.0324127	-0.609515		2.21072
GCGUGG	-0.735039	1.49783	1.04788	0.434102		0.0537257
GCGUGC	-1.02586	1.41195	1.49567	0.369493		0.173412
GCGUGA	0.0412611	0.238387	-0.0862454	-0.33451		0.516009
GCGUCU	0.454972	0.186307	-0.129539	0.17741		0.325483
GCGUCG	-0.390139	0	0.314262	-0.0915043		0.604355
GCGUCC	-0.147175	0.398614	0.337513	0.21148		0.437694
GCGUCA	-0.544282	0.448892	-0.217801	-0.157743		0.638128
GCGUAU	0.325589	-0.121965	-0.0571021	-0.278102		0.309138
GCGUAG	-1.26591	0	-0.0610424	-0.113473		1.14475
GCGUAC	0.843032	-0.311483	0.689689	0.845255		0.831143
GCGUAA	-0.0693908	-0.0645251	-0.249654	0		0.201541
GCGGUU	-0.0945791	1.06675	-0.0510079	0.102977		0.746035
GCGGUG	0.658096	1.27058	0.123674	0.306994		0.0959683
GCGGUC	-0.0622983	0.252849	1.08621	0		0.328162
GCGGUA	0	0.184906	0	0		0.191754
GCGGGU	0.200667	0	0.467711	0.273587		0.133803
GCGGGG	-0.189194	0.276795	0.572639	-0.028823		0.0215141
GCGGGC	-0.0830294	0.361051	2.61754	0.181903		0.352191
GCGGGA	0.218695	2.10504	2.27283	0.616231		0.361175
GCGGCU	0.922849	2.84804	3.75123	2.34683		0.00101834
GCGGCG	0	-0.73843	0.205704	-0.123776		0.0876665
GCGGCC	0.0408103	0	0.84358	0.125611		0.00789673
GCGGCA	0	0.141721	1.44516	0.542174		0.0360795
GCGGAU	-1.17831	0	-0.0524174	0		0.0241398
GCGGAG	-0.464027	-0.126249	0.880793	0		0.0106031
GCGGAC	-2.03109	0.300662	-0.192705	0.655578		0.185136
GCGGAA	-0.668048	0.233414	-0.161613	-0.522942		0.238703
GCGCUU	0.366348	-0.655294	-0.408786	-1.25596		0.811933
GCGCUG	-0.950383	1.73599	0.978927	0.0669225		0.406372
GCGCUC	-1.68257	0.4747	0.235425	-0.615319		0.332905
GCGCUA	-0.250436	-0.220473	-1.31954	-0.482643		0.0836854
GCGCGU	-0.454958	-0.0700972	-0.168709	-0.696377		5.44504
GCGCGG	-1.36222	0	1.01994	0		0.138946
GCGCGC	-1.59229	-1.14003	0.261932	-2.83999		0.865197
GCGCGA	-1.10873	0	0.695158	0		0.712722
GCGCCU	-0.556689	0.523221	0.174424	-0.16301		0.610269
GCGCCG	-0.323467	0.769206	0.355108	0.247021		0.600156
GCGCCC	-1.09655	1.99112	2.31108	0.223761		0.00605429
GCGCCA	0	0.720009	1.1708	0.552444		0.182909
GCGCAU	0.27013	1.51736	0	0		0.0667501
GCGCAG	-0.079644	0.436856	-0.0809009	-0.647769		0.00273295
GCGCAC	-0.53641	-0.672907	0.314512	-0.20184		0.163799
GCGCAA	0.0674239	0.132938	-0.0631767	-0.465689		0.0912645
GCGAUU	-0.0538857	-0.273689	-0.0757835	0.366729		0.655163
GCGAUG	0.0958935	0.418167	0.157255	0.155091		2.01858
GCGAUC	-0.135351	0.160244	0	-0.0627839		0.388222
GCGAUA	-0.350595	-1.06484	-0.877802	-1.62506		0.299102
GCGAGU	-0.17583	0.184906	0.751075	0.218614		0.252208
GCGAGG	-0.599746	-0.0387514	0	0.17741		0.132885
GCGAGC	-0.639174	1.15378	1.20252	0.17741		0.193683
GCGAGA	-0.258357	0.371005	0.102123	-0.344293		0.181634
GCGACU	0.162864	0.845071	0.309011	0.259529		1.46327
GCGACG	0.404812	-0.374398	0	-0.085767		0.306438
GCGACC	-0.0601245	0.40408	0.43622	0		0.148288
GCGACA	0	-0.248469	-0.119084	0.573601		0.0918802
GCGAAU	-1.02267	-0.0644704	-0.450062	-0.0627839		0.469013
GCGAAG	-0.231928	0.309532	1.51892	0.314771		0.223727
GCGAAC	-0.56756	-1.42969	0	-0.120193		0.0825278
GCGAAA	-0.733625	-1.63955	0.205704	-1.36977		0.324586
GCCUUU	-1.38183	-0.412076	0.379341	1.04482		0.501604
GCCUUG	0.191538	1.54274	1.685	0.994788		0.104629
GCCUUC	-0.407684	0.709957	2.70274	4.039		0.0945089
GCCUUA	0.0411098	0.624057	-0.318171	0.213972		0.164188
GCCUGU	-0.267332	1.30549	1.91531	1.72495		0.537161
GCCUGG	-0.0663124	8.80751	14.4599	8.768		7.68e-07
GCCUGC	-0.131306	3.10209	6.65878	4.89649		0.00494875
GCCUGA	-0.456016	3.68532	5.49565	3.08116		0.0145228
GCCUCU	-0.155689	4.1222	4.86127	2.35351		0.0121102
GCCUCG	0.0569128	5.1138	3.58029	2.8234		0.00666113
GCCUCC	-0.776443	5.7098	7.95956	6.14852		0.0192721
GCCUCA	-0.191481	2.69133	4.03896	2.9764		0.000614108
GCCUAU	1.67229	-0.11127	-0.646429	0.209759		0.557473
GCCUAG	0.0209432	1.50072	1.49555	0.955311		0.0126997
GCCUAC	0.837505	0	0.436267	-0.0264476		0.396026
GCCUAA	0.365784	0.471467	-0.103487	0.292962		0.0340567
GCCGUU	0	-0.723409	0.141107	-0.0804319		0.87584
GCCGUG	-0.891182	1.26544	1.3325	1.67239		0.856628
GCCGUC	0	-0.14767	0.299185	0.533748		2.3448
GCCGUA	-0.53654	0	1.04415	0.135925		0.785388
GCCGGU	-0.274299	0.0442469	0.83642	1.39339		0.495449
GCCGGG	-3.98321	0.381738	0.72911	0.0316873		0.0353098
GCCGGC	-1.20567	0.0787096	1.09392	0.11186		0.159066
GCCGGA	-0.35582	0	2.06671	0.485895		0.0246936
GCCGCU	0.0791563	0.0369231	0.454618	0.990191		0.0923297
GCCGCG	-0.481878	0.263897	0	-0.0608263		0.140106
GCCGCC	-1.30117	3.4087	2.14396	3.9247		0.112835
GCCGCA	-0.320319	0.0416619	0.260013	0.890692		0.136154
GCCGAU	-0.772632	0	0.0520298	0.496253		0.563286
GCCGAG	-1.19204	0	0.659198	3.12442		0.648903
GCCGAC	-0.0491766	1.04048	0.0548337	-0.240368		0.199998
GCCGAA	-0.416077	0.109023	1.0013	1.04783		0.500387
GCCCUU	-0.527743	3.39794	5.028	3.31685		0.699995
GCCCUG	0.0127393	8.10468	12.5595	10.8197		0.000790699
GCCCUC	0.196848	9.34813	10.2191	8.10121		0.00342757
GCCCUA	0.769052	1.37714	1.89861	1.31708		0.0253266
GCCCGU	-0.976508	0.321135	0.498381	0.116406		0.0307225
GCCCGG	0.238923	2.08759	4.22471	2.43231		0.526462
GCCCGC	-1.28313	2.25338	1.25598	1.45661		0.0465603
GCCCGA	0.677724	1.02628	3.33382	0.555757		0.581504
GCCCCU	0.4863	5.71164	5.98411	7.44161		0.000897828
GCCCCG	-1.55014	2.53633	4.18912	3.60118		0.0213881
GCCCCC	0.577349	3.62661	2.07039	1.09086		0.0056056
GCCCCA	0.126625	7.68591	10.2069	8.01292		2.14e-07
GCCCAU	0.927166	2.27501	2.01473	1.35177		0.193971
GCCCAG	0.431306	1.92497	9.71559	6.22127		8.74e-06
GCCCAC	0.825326	5.00244	11.2534	4.77511		0.00138516
GCCCAA	3.43172	2.81376	4.89345	1.79138		0.00328517
GCCAUU	0.179803	-0.21785	0.278134	-0.19242		1.25252
GCCAUG	0.133593	0.372949	1.78749	2.21631		7.29e-05
GCCAUC	-0.557862	0.65636	0.561555	1.30133		0.0171415
GCCAUA	0.464069	-0.317256	0.438048	-0.25613		0.0401552
GCCAGU	-0.274198	0.536271	1.39244	1.26773		0.0152752
GCCAGG	-0.0600417	6.17965	10.8205	3.03961		0.00475035
GCCAGC	0.030591	3.89842	6.35585	5.16785		3.54e-06
GCCAGA	-0.760079	1.54741	0.781731	1.42554		0.000525443
GCCACU	0.294217	2.84666	2.27208	4.25413		0.22506
GCCACG	-1.62139	1.34931	1.47237	0.697034		0.00602813
GCCACC	0.53998	4.49419	3.31535	4.91583		0.0904258
GCCACA	0.443549	2.06306	5.36308	2.63432		0.000187815
GCCAAU	0.744013	0.459839	0.863302	0.734433		0.21069
GCCAAG	0.514092	1.48718	3.5661	2.88039		0.000438802
GCCAAC	1.64501	0.747969	2.05418	1.19482		0.000117394
GCCAAA	-0.0345723	-0.534287	-0.274455	-0.331253		0.262511
GCAUUU	-0.107215	-0.75577	-4.02669	-1.35488		5.09013
GCAUUG	-1.50963	0.307655	-0.110797	-0.196795		1.30377
GCAUUC	0.140545	0.124657	-0.747378	-0.121127		0.695516
GCAUUA	-0.11779	-2.92941	-2.12062	-1.34377		0.195426
GCAUGU	-0.0523475	-0.224659	-1.15654	0		2.3514
GCAUGG	1.10907	-0.454802	-0.147555	-0.0567068		7.8e-05
GCAUGC	0.0395722	-0.188551	0.0925422	0.109302		0.286876
GCAUGA	0.245217	-0.189525	-0.307763	0.265277		0.0908179
GCAUCU	1.03364	0.0180855	-0.0383211	0.527802		0.000631829
GCAUCG	0.0460308	-0.0447568	-0.199441	0.313638		0.0322966
GCAUCC	0.849924	1.43543	2.94551	2.8938		0.00827302
GCAUCA	0.805153	0.470756	-0.0450861	-0.207597		0.0773106
GCAUAU	0.0881137	-1.81206	-1.55095	-0.943922		0.144852
GCAUAG	-0.334114	-0.0253617	0	1.10359		0.0420027
GCAUAC	1.23908	0.373789	-0.246618	-1.27207		0.00227015
GCAUAA	0	-1.13901	-0.934067	-2.71512		0.50233
GCAGUU	-2.37982	-1.51662	-1.13625	-0.234487		4.20683
GCAGUG	-0.996617	0.214049	0.634097	0.172038		0.170819
GCAGUC	-1.7204	-0.199511	1.60904	0.0885535		0.582819
GCAGUA	-3.62642	-0.784994	-0.382255	-0.563814		0.835335
GCAGGU	0	1.79115	1.73315	0.781921		0.00200748
GCAGGG	0.323377	7.4165	6.43539	2.17965		0.0595325
GCAGGC	-0.870839	3.39796	2.69599	2.21987		3.58e-08
GCAGGA	0.079609	2.39815	2.59884	2.5026		0.00178515
GCAGCU	-1.14232	0.707536	3.19685	0.856837		0.0249993
GCAGCG	-0.253344	0.366369	0.498381	0.589065		0.0837592
GCAGCC	0.219036	3.43156	4.33837	7.14013		0.00174765
GCAGCA	-0.641039	1.90126	1.10849	2.02287		0.00192999
GCAGAU	-0.140703	0.193655	-0.174391	-0.490071		0.17824
GCAGAG	-0.20983	1.77608	0.952824	1.14781		7.88e-06
GCAGAC	-0.43889	0.941032	0.474717	0.240491		0.000542897
GCAGAA	-0.0655907	-0.36707	0.125271	0.275049		0.072812
GCACUU	-0.760225	-5.89345	-1.74385	-1.45924		0.134882
GCACUG	-0.509827	1.9523	1.35794	2.61081		9.62e-05
GCACUC	-1.02353	-0.407196	0.764974	0.338089		0.00377185
GCACUA	-0.110175	-0.201507	-0.0269058	-0.658445		0.130571
GCACGU	0.408005	1.21049	0.415164	0.578684		0.143056
GCACGG	0	0.929491	0.222794	0.220995		0.055384
GCACGC	0.337999	-0.0418085	0.475965	-0.165031		0.00236106
GCACGA	0	0.270564	0.13364	0.60742		0.0227089
GCACCU	-0.201554	0.742221	2.95655	0.747334		0.0906882
GCACCG	-0.0830294	0.375768	-0.326037	0		0.0854778
GCACCC	1.8727	2.72977	5.6784	3.19634		0.0271213
GCACCA	-0.526006	0.796557	1.45827	-0.173988		0.00203653
GCACAU	0.0178056	-0.95508	0	0.421363		0.00759726
GCACAG	-0.4035	1.61568	2.71412	1.88457		0.0167861
GCACAC	0.770439	0	1.39626	0.714614		0.0325031
GCACAA	1.12979	-0.359631	0.930608	0.345117		0.113656
GCAAUU	0.20361	-0.113514	-0.606152	0		0.0183471
GCAAUG	2.33974	0.419845	1.19574	0.180688		0.456547
GCAAUC	0.327107	0.369465	-0.271995	0.172843		0.0361391
GCAAUA	0.355363	-1.10245	-0.534038	-0.245128		0.030693
GCAAGU	0.269313	-0.908099	-0.583439	-0.866093		0.0354603
GCAAGG	0.846307	1.27011	1.37773	0.592673		0.0116829
GCAAGC	0.818392	0.814373	0.862616	0		0.0110107
GCAAGA	1.26684	0.178437	0.399645	-0.363311		0.00171371
GCAACU	0.489789	-1.16199	-0.230177	-1.67909		0.00283153
GCAACG	0.0574482	-0.256098	-1.38547	-0.0544045		0.17488
GCAACC	0.571832	-0.0261771	0.742791	0.143636		0.000781847
GCAACA	0.895647	0	0.250272	-0.0995314		0.0394236
GCAAAU	0.651534	-0.579048	-1.96759	-2.11507		0.0208951
GCAAAG	1.54453	-1.15857	-0.26909	-1.14514		0.000287555
GCAAAC	1.19034	-0.668592	-0.206493	-1.95717		2.11e-05
GCAAAA	0.547888	-3.68508	-2.63778	-4.39665		0.0453357
GAUUUU	-1.50838	-2.81797	-7.52833	-2.7635		2.51841
GAUUUG	-0.37371	-2.73471	-1.47968	-1.85456		1.26463
GAUUUC	0.131722	-0.566817	-3.0704	-1.69914		0.758477
GAUUUA	-0.486134	-0.702848	-3.61453	-4.25821		1.19131
GAUUGU	-0.969372	-0.558341	-1.70524	-0.502029		5.10091
GAUUGG	-0.669974	0.0489009	-0.165398	0.357309		2.0254
GAUUGC	-0.678192	-1.24698	-0.223469	-0.471186		0.997881
GAUUGA	0.0485055	-0.150793	-0.701096	-1.16211		1.70236
GAUUCU	0.0346783	-0.734484	-0.270158	0.0366579		0.185469
GAUUCG	-0.226197	-2.31726	-0.706973	0		0.269504
GAUUCC	0.717681	0.0459551	0.215274	0.627247		0.45898
GAUUCA	0.539872	-1.67124	-1.55095	-0.883983		0.136006
GAUUAU	0.14261	0.159725	-1.52379	-0.575463		0.48024
GAUUAG	-0.389834	0.742886	0.152795	0.39896		1.00818
GAUUAC	0.0892007	-0.308716	-1.70647	-0.743983		0.56637
GAUUAA	-0.361985	-0.170347	-1.54478	-0.857404		0.225799
GAUGUU	-0.312545	-0.976783	-1.04224	-0.558713		0.547444
GAUGUG	0	-0.293054	-0.109593	-0.507459		2.85537
GAUGUC	-0.610609	0	0.216806	-0.297968		0.707313
GAUGUA	0.166784	-2.48938	-3.53735	-1.41071		0.372896
GAUGGU	-0.293494	0.164089	-0.440946	0.109302		0.133796
GAUGGG	0.600357	0.676645	1.13998	0.663283		0.0775159
GAUGGC	-0.0183702	0.280479	0.474717	-0.01795		0.00388261
GAUGGA	0	-0.0356856	0.307703	-0.0349851		0.0387357
GAUGCU	2.02834	-0.016984	0.586656	0.160404		0.0442213
GAUGCG	-0.0882623	-0.454832	0.400108	-0.923455		0.216285
GAUGCC	1.00913	1.43543	3.29088	2.1061		0.106504
GAUGCA	-0.103355	0.251122	0	0.084115		0.0265664
GAUGAU	-0.241268	0.94199	0.0455243	-0.152806		0.137648
GAUGAG	0.132397	1.70358	0.167137	-0.0827922		0.1314
GAUGAC	0.140545	0.119018	0.48927	0		0.0496821
GAUGAA	0.405762	-0.288274	-1.17873	-0.982165		0.838854
GAUCUU	-0.235161	-0.0865335	-1.68209	-1.19072		1.71393
GAUCUG	-0.736878	0.765749	0.572206	0.404417		0.189307
GAUCUC	1.07732	1.03651	0.705797	0.231291		0.0291912
GAUCUA	-0.307312	-0.123412	-1.72911	0		0.0239474
GAUCGU	0.39758	0.120738	0.108813	0.16735		0.96601
GAUCGG	-0.250436	0.0575113	-0.0658765	0.0568065		0.18827
GAUCGC	-0.381831	2.29364	1.01994	0.377413		0.514946
GAUCGA	-0.135351	-0.14106	0.13364	0		0.282596
GAUCCU	-0.0200169	0.0898989	1.5154	0.31388		0.376556
GAUCCG	0.189238	0.463531	0.767848	0		0.0603597
GAUCCC	1.10301	3.20481	3.04121	1.37889		0.00582046
GAUCCA	0.970108	0.515812	-0.131475	0.310808		0.213914
GAUCAU	2.14815	-1.38817	-0.489389	-0.474433		0.327878
GAUCAG	1.2996	-0.0218837	0.218563	0.293959		0.00373025
GAUCAC	-0.180232	-0.181322	0.343572	-0.318678		0.00590336
GAUCAA	0.25305	-0.564886	-1.53601	-0.587818		0.0069111
GAUAUU	0.101733	-2.09914	-3.84103	-1.35861		0.378451
GAUAUG	0.612389	-0.184067	-0.0519215	-0.0777406		0.622425
GAUAUC	2.9835	-0.136207	-1.14932	-0.0653681		0.0833134
GAUAUA	0.756383	-1.78198	-0.76662	-1.61976		0.126218
GAUAGU	-0.140998	-0.941032	-2.31512	-0.435654		0.983411
GAUAGG	0.865795	0	0.120847	0.0270744		0.763411
GAUAGC	0.273733	0.348724	-0.119798	-0.117175		0.189874
GAUAGA	1.49953	0.825264	0.0727598	0.12626		0.400398
GAUACU	0.0754672	-0.0752606	-0.140269	-0.676685		0.107023
GAUACG	-0.518546	-0.693094	-0.0631767	-0.323545		0.0129665
GAUACC	0.227952	-0.0284961	-0.363613	-0.0282323		0.101097
GAUACA	-1.32507	-1.99595	-5.34591	-3.33331		0.0188886
GAUAAU	-0.0436543	-1.75291	-1.13758	-3.3455		0.431785
GAUAAG	1.24296	0.112991	-0.644664	-0.819835		0.0262254
GAUAAC	-0.180232	-1.23615	-0.386536	-0.446911		1.00592
GAUAAA	-0.196379	-1.03755	-0.807467	-1.39897		0.0383266
GAGUUU	0.324394	-0.726093	-1.71411	-0.700962		0.60572
GAGUUG	-2.03019	-1.18286	-0.612546	-1.12894		0.688847
GAGUUC	-0.185433	0.11991	0	-0.500613		0.000694085
GAGUUA	-0.16784	-0.378653	-0.273863	-0.132735		0.340096
GAGUGU	-0.900092	0.571375	0.0545077	0.440399		1.10633
GAGUGG	-1.44915	0.64418	0.53263	0.546462		0.284197
GAGUGC	-0.0822871	0.787939	0.343907	0.114987		0.0750122
GAGUGA	-0.215894	1.88384	0.65793	0.168902		0.0562788
GAGUCU	1.2495	0.32733	2.02257	0.859898		0.0183282
GAGUCG	1.27316	0.0855725	2.09519	0.127062		0.0158022
GAGUCC	0.365352	0.95584	0.115958	-0.134491		0.0658415
GAGUCA	0.492957	0.559031	0.10652	-0.166943		0.000514051
GAGUAU	-0.699075	0.223523	-1.49454	-0.746357		0.387152
GAGUAG	-0.520083	-0.187288	-0.24371	-0.356513		0.432379
GAGUAC	-0.266846	0.155906	-0.124881	0.123816		0.513756
GAGUAA	1.26119	-0.782241	-0.023996	-0.0239345		0.158133
GAGGUU	-1.1088	-1.012	-0.059888	-0.558186		0.0830761
GAGGUG	-0.219454	0.107171	-0.071972	0		0.00790863
GAGGUC	0.911281	0.0656129	1.26321	0.873257		0.01868
GAGGUA	-0.0792252	0.4356	-0.0522394	0.132565		0.942978
GAGGGU	0.680029	2.85706	2.99521	1.81146		0.0176425
GAGGGG	0.455683	3.73904	2.71412	4.43984		0.0961802
GAGGGC	-0.751078	4.62819	3.38522	1.0552		0.000194841
GAGGGA	0.533659	3.66361	3.55383	1.90976		0.000211106
GAGGCU	0.481776	3.67474	2.64668	2.51519		0.12368
GAGGCG	-0.150205	0.557406	0.285438	0.213433		0.357306
GAGGCC	-0.585706	4.45475	2.85939	1.32068		0.000235894
GAGGCA	0.881691	0.807346	1.12865	1.81603		6.36e-05
GAGGAU	-0.453898	0.089606	0.622075	0.54854		0.0493765
GAGGAG	-0.415651	4.98597	4.03315	1.98299		0.00138885
GAGGAC	0.438841	0.500136	2.48828	1.46046		0.000735379
GAGGAA	0.445708	0.16648	0.0449028	0.107394		0.00302749
GAGCUU	-0.54021	0.461694	-0.0810522	0.514343		0.793072
GAGCUG	-0.123064	0.722592	2.99323	1.74711		0.0216532
GAGCUC	-0.527829	2.2813	3.18797	1.48888		0.0371446
GAGCUA	0.280981	1.01162	0.59459	0.143487		0.0125384
GAGCGU	-0.438892	-0.0930777	0.888585	0.0413595		0.451155
GAGCGG	-0.123541	1.0617	1.24779	0		0.223589
GAGCGC	-0.142047	1.78074	1.59086	0.833362		0.138649
GAGCGA	-0.772861	0.0827165	0.214503	-0.128261		0.245676
GAGCCU	-0.487573	2.33595	6.19551	2.97141		0.00448506
GAGCCG	-3.84395	0.226876	0.758268	2.4887		0.300062
GAGCCC	-0.0173011	7.06456	10.3453	5.26546		1.82e-06
GAGCCA	-0.250083	1.64736	2.51044	0.962354		0.000608142
GAGCAU	-0.18001	1.54832	-0.401927	0.497654		0.0148306
GAGCAG	-0.841329	0.605043	3.11004	0.0852334		0.0352173
GAGCAC	-0.193683	0.10262	0.412987	0.637253		0.0195295
GAGCAA	0.901865	1.23619	2.05135	0.375504		5.85e-05
GAGAUU	0.101166	-1.5696	-2.73088	-1.65135		1.88308
GAGAUG	2.13642	1.283	0.301702	-0.09864		0.118027
GAGAUC	0.28446	1.3846	0.223875	-0.703133		0.0921103
GAGAUA	0.605747	0.268709	-0.499079	0.0742734		0.000116459
GAGAGU	0	0.398916	-1.29216	-0.172754		0.128926
GAGAGG	0.177581	0.291063	1.36425	0.0297969		0.00086853
GAGAGC	-0.923178	0.947004	1.06406	0.256195		0.0246746
GAGAGA	7.49784	-4.07795	0.0485423	-0.519549		0.00531694
GAGACU	-0.437012	-0.909481	-0.244232	-0.705929		0.0761608
GAGACG	0.0766168	0	0.470463	-0.568622		0.0646746
GAGACC	0.267938	0.269129	2.16338	0.69982		0.00270181
GAGACA	0.194467	0.548042	0.760457	-0.0629716		3.73e-06
GAGAAU	0.173892	-1.2546	-0.761372	-0.957287		0.07159
GAGAAG	0.686347	0.333026	0.33518	-0.278581		0.0154546
GAGAAC	0.346874	1.05997	0.657456	-0.51375		0.00568824
GAGAAA	1.9429	-1.07267	-1.62532	-1.96501		7.94e-05
GACUUU	-2.1211	-0.708032	-3.964	-0.304506		2.4551
GACUUG	-3.84329	0.0910193	-0.396391	-0.330855		1.16257
GACUUC	-0.0769568	0.907956	0.817075	1.33117		0.00352245
GACUUA	-2.00528	-1.1571	-0.850907	-0.460879		0.560737
GACUGU	-0.0836923	-0.491111	-0.717605	-0.0331854		0.69997
GACUGG	-0.111693	0.389569	0.757103	0.293947		0.00112333
GACUGC	0.0184128	0.805673	1.05042	0.357891		0.010206
GACUGA	-0.982715	-0.0546625	-0.683062	-0.245885		0.126557
GACUCU	0.826169	1.68928	1.55583	2.29998		0.00716703
GACUCG	-0.587663	-0.0714304	-0.0753269	0.0366128		0.366704
GACUCC	-0.277758	1.72361	3.74817	0.904005		0.0106765
GACUCA	-0.318205	1.00257	0.800919	0.707008		0.000623259
GACUAU	0.44619	-0.679861	-0.966847	-0.773073		0.0175566
GACUAG	-0.752079	-0.211702	-0.881827	-0.809226		0.96455
GACUAC	1.68603	0.700605	0.62927	0.47531		0.000786219
GACUAA	1.22107	-1.13661	-0.0831325	0.232479		0.120677
GACGUU	-1.56487	0	-0.150436	0		0.514322
GACGUG	-1.0293	0.272392	0.459972	-0.16301		0.00216797
GACGUC	-0.559903	-0.650582	0.154911	0.340875		0.0185476
GACGUA	0.166152	0.752177	0	-0.127577		0.234528
GACGGU	0	0.0442469	0.0481995	-0.151762		0.670369
GACGGG	-1.41945	-0.0457005	-0.73512	-2.63019		0.232369
GACGGC	-0.347913	-0.35745	-0.217801	-0.414868		0.0369089
GACGGA	-0.599116	0.243886	-0.358409	-0.355955		0.00219488
GACGCU	-0.0406374	0.201872	0.0855124	0.425514		0.367394
GACGCG	-0.0846173	0.424931	0.613169	1.19511		1.12772
GACGCC	-0.167474	0.0437199	0.407694	0.249018		0.0672393
GACGCA	0	-0.979983	-0.358145	-1.07399		0.440293
GACGAU	0.198671	0.0562549	0.295142	1.45395		1.19429
GACGAG	-0.286515	0.456286	1.29468	-0.169495		0.1038
GACGAC	0.0490119	-3.11287	1.72366	-0.849718		0.302523
GACGAA	0.115051	0.0550327	-0.28657	-0.182649		0.56854
GACCUU	1.41122	0.0187588	1.81542	0.883603		0.048488
GACCUG	-0.392872	5.04951	5.70839	2.92261		0.00670141
GACCUC	0.470197	2.27213	2.52071	2.29369		0.0209186
GACCUA	-0.281462	0.0822516	0.454914	0.052775		0.0262209
GACCGU	0.0879965	0.29275	0.0415414	-0.143394		0.0411279
GACCGG	1.12644	0.364548	1.70998	1.77053		0.00671266
GACCGC	-0.050275	0.849877	0.609833	-0.103538		0.546053
GACCGA	-1.42436	0.530925	0.586078	-0.0991823		0.665584
GACCCU	-0.260564	0.922515	3.04922	1.88766		0.00112559
GACCCG	0.432056	-0.435384	0.232914	0.640128		0.432876
GACCCC	0	4.38657	5.21145	3.24942		0.00154526
GACCCA	0.28463	2.34916	3.63283	0.715616		0.000897981
GACCAU	-0.416752	0.0227568	0.151861	0.14504		0.0987308
GACCAG	0.242692	2.89984	3.43441	0.813755		0.10645
GACCAC	1.27944	4.32706	2.95012	2.29863		0.0607569
GACCAA	1.84761	0.317301	0.194219	-0.135526		0.147263
GACAUU	-0.448983	-0.733988	-1.06688	-0.558186		0.353867
GACAUG	0.314094	-0.423892	-0.0201932	0.172842		0.00612004
GACAUC	0.88754	0.0697852	0.0978706	-0.261685		0.00208274
GACAUA	1.19444	0.0257957	-0.595307	-0.385616		0.0121764
GACAGU	-0.377311	0.614476	0.229214	0.350888		0.00504197
GACAGG	0.0499739	3.70465	4.77088	1.58214		0.000860024
GACAGC	0.016786	0.666478	1.28938	2.15878		3.98e-05
GACAGA	0.253991	-0.370974	0.23193	0.313505		5.11e-05
GACACU	-1.24123	-0.0583321	0.766265	0.119249		0.0080886
GACACG	0.117805	-0.629613	0.119331	0.0355906		0.0586744
GACACC	0.290857	2.60355	2.74099	2.73177		1.58e-06
GACACA	1.37626	0.612684	2.21253	0.670773		0.00145129
GACAAU	1.19444	-0.10833	-0.20843	-0.879718		0.0110009
GACAAG	1.40655	0.0624513	0	-0.148985		0.0145708
GACAAC	0.818762	-0.176116	0.971817	0.885657		0.0521953
GACAAA	2.27247	-1.35583	-1.52693	-0.684604		0.0166211
GAAUUU	-0.308312	-3.94737	-9.29686	-8.42359		1.58864
GAAUUG	-1.52057	-2.23521	-1.8085	-2.65518		0.788123
GAAUUC	0.725345	-1.77828	-0.622445	-0.393844		0.0173126
GAAUUA	0.425948	-0.962486	-1.66148	-0.349508		0.739713
GAAUGU	-0.0622454	-0.966217	-1.68525	-1.7824		0.153673
GAAUGG	-0.334812	-0.272393	-1.51084	-1.02862		0.113777
GAAUGC	0.745863	0.151178	-0.0462459	-0.181203		0.0513421
GAAUGA	0.0167516	0	0	-1.28781		0.00420647
GAAUCU	0.124381	-1.17789	-1.08775	-1.54346		0.256671
GAAUCG	0.555639	0.329129	0.396084	0		0.448547
GAAUCC	0.970108	0	-0.0716807	-0.143163		0.0170897
GAAUCA	1.13457	-1.19061	-1.22941	0.194764		0.177782
GAAUAU	0.438841	-0.13492	-2.59657	-1.21739		0.368886
[truncated: 2,099 more rows]
