# Supplementary material for: Systematic Analysis of Cis-Elements in Unstable mRNAs Demonstrates that CUGBP1 Is a Key Regulator of mRNA Decay in Muscle Cells
Source: PLoS One. 2010 Jun 21;5(6):e11201. doi: 10.1371/journal.pone.0011201 (PMC2888570; doi:10.1371/journal.pone.0011201)
Supplement: Table S3 — Lists of mRNA targets shared by CUGBP1, HuR and/or Pum1. Datasets from RIP Chip experiments using HuR and Pum1 antibodies [39]–[41] were compared with the set of mRNAs immunoprecipitated with CUGBP1 using Ingenuity Pathways Analysis (Ingenuity Systems, www.ingenuity.com). Symbols of genes whose mRNAs are bound by the indicated RNA-binding proteins are listed. (0.03 MB XLS) [file pone.0011201.s008.xls]

## Sheet: Sheet1
CUGBP1+HuR	CUGBP1+Pum1	HuR+Pum1	HuR+Pum1+CUGBP1
ABHD13	ABHD13	ABHD10	ABHD13
AMMECR1L	ABLIM1	ABHD13	AP3S1
AP3S1	ALG10	ACBD3	ARL6IP1
APBB2	AMOTL2	AGPAT5	ASAP1
ARL5B	ANKH	AKIRIN2	ATF2
ARL6IP1	AP3S1	ANGEL2	BUB3
ARPC5	ARID5B	ANP32A	C10ORF46
ARRDC3	ARL6IP1	AP3S1	CAPZA1
ASAP1	ARL6IP6	ARCN1	CSNK1D
ATF2	ASAP1	ARL5A	CXCR4
B4GALT6	ASB1	ARL6IP1	DCAF12
BTF3L4	ASB8	ASAP1	DCK
BUB3	ATF2	ATAD1	E2F3
C10ORF46	ATP1B3	ATF2	EIF4E
C13ORF37	ATP6V1B2	AZIN1	FZD6
C14ORF4	ATP6V1G1	B4GALT5	G2E3
C1ORF77	AURKA	BCL10	KRAS
CANX	B4GALT1	BNIP2	LSM14A
CAPZA1	BCL2L1	BNIP3L	MEAF6
CDK6	BMI1	BRD2	PAK2
CDK2AP1	BUB3	BUB3	PLEKHA1
CDKN2AIPNL	C10ORF46	C10ORF46	PPP6C
CDV3	C16ORF52	C5ORF15	PRRC1
CMTM6	C19ORF22	C7ORF42	PTP4A1
CNOT6	C5ORF24	C9ORF82	RAB18
CORO1C	CAPZA1	CA8	RAN
CSNK1D	CCDC6	CALM2	RBMS1
CSNK2A1	CCNB1	CAPZA1	RBPJ
CTDSPL2	CCNT2	CAPZA2	RNF38
CUGBP1	CD9	CASC4	SEH1L
CUGBP2	CDC2	CASD1	SFRS1
CXCR4	CDKAL1	CBFB	SFRS5
DCAF12	CDKN1A	CCNG2	SIAH1
DCK	CDS2	CD2AP	SLMO2
E2F3	CLPTM1	CDC42SE2	SPIN1
EFHD2	COQ10B	CDKN1B	TCF7L2
EIF2S3	CSNK1D	CHEK1	TM9SF3
EIF4E	CXCR4	CHIC1	TMED10
EIF4EBP1	DCAF12	CHRAC1	TMEM106B
EIF4EBP2	DCK	COG6	TMEM167A
ELAVL1	DDX3X	COQ7	TMEM170A
FAM122B	DEPDC1B	CPEB4	TMEM41B
FAM91A1	DEPDC6	CSNK1A1	TULP4
FZD6	DNAJB1	CSNK1D	UBE2C
G2E3	DUSP1	CSNK1E	UBE2W
GATAD2B	E2F3	CUL5	UBE3A
HIPK1	EIF4E	CXCR4	UBTD2
HNRNPK	ELL2	DCAF12	UGCG
IMPAD1	EN1	DCK	VAV2
JUND	ESYT2	DCUN1D1	WEE1
KRAS	F2R	E2F3	ZC3HAV1L
LARP1	FAM54A	EDEM1
LMNB1	FBXL14	EDEM3
LSM12	FBXW11	EIF4E
LSM14A	FNBP1L	FAM133B
LUC7L2	FOSL2	FAM160B1
LZTFL1	FUNDC1	FAM60A
MARCH6	FZD6	FAM76B
MARK2	G2E3	FAR1
MAT2B	GAS1	FBXO3
MEAF6	GBAS	FBXO4
MIDN	GDI1	FGFR1OP2
MLEC	GNG10	FMR1
MMD	GTPBP1	FOXN3
MOBKL2A	H1F0	FOXP1
MSL2	HMOX1	FZD6
MYADM	HNRPDL	G2E3
NEK7	HOXA10	GCA
NET1	IER5	GMCL1
NUCKS1	IFNGR2	GOLPH3
PABPN1	ITGB3BP	GOLT1B
PAFAH1B2	JUN	GSK3B
PAK2	KIAA0776	HERC4
PBX2	KLF6	HIAT1
PCBP1	KPNA2	HK2
PFDN2	KRAS	HMG20A
PLEKHA1	LPCAT1	HNRNPC
PPIG	LSM6	HNRNPR
PPP1CB	LSM14A	HP1BP3
PPP1R15B	LZTS2	HSD17B12
PPP6C	MAFG	IER3IP1
PRKAR1A	MEAF6	IMPA1
PRRC1	MEF2D	IRF2
PSMD10	MOBKL1A	ISCA1
PTMA	MORF4L2	KIAA0247
PTP4A1	MOSPD3	KIF11
RAB18	MRPS17	KRAS
RAB21	NFKBIA	LBR
RAN	NR2F1	LIN7C
RAP2B	NUFIP2	LIX1L
RBBP4	NUSAP1	LSM14A
RBM3	PAK2	MAK16
RBMS1	PCTK2	MAX
RBPJ	PIAS2	MBNL1
RCC2	PJA2	MBNL2
RDX	PLEKHA1	MEAF6
REEP3	PMP22	MED28
RNF2	PPM1A	MKNK2
RNF38	PPP6C	MOBKL2B
RNF219	PRPF18	MSI2
ROD1	PRRC1	MTF2
SEC22B	PTCH1	MTPN
SEH1L	PTP4A1	MYOCD
SEPT7	PUM1	NCL
SF1	PURB	NFIA
SFRS1	RAB18	NFYB
SFRS5	RAB11B	NUDT4
SIAH1	RAB2A	NUPL1
SLMO2	RABGGTB	OPA1
SNRNP27	RAC1	OTUD6B
SNX3	RAN	PAK2
SPC25	RAP1B	PCNP
SPCS2	RBM5	PDIK1L
SPIN1	RBM39	PHF2
SPRED2	RBM25	PHF20L1
SSR1	RBMS1	PIK3CB
SUB1	RBPJ	PIM1
TCF7L2	RGMB	PITPNB
TERF1	RNF38	PLAC8
TFAP4	RNF139	PLDN
TM9SF3	RRP1B	PLEKHA1
TMED2	SCAMP1	PPP1CC
TMED10	SEH1L	PPP1R12A
TMEM64	SFRS1	PPP6C
TMEM65	SFRS5	PRRC1
TMEM106B	SGK1	PTP4A1
TMEM167A	SGPP1	QKI
TMEM170A	SIAH1	RAB18
TMEM41B	SIK1	RAB11A
TRAM1	SLC25A44	RAB2B
TSNAX	SLC35A3	RAB5B
TULP4	SLC35A5	RAB6A
TWSG1	SLC38A2	RAN
UBE2C	SLC9A6	RBM27
UBE2E3	SLMO2	RBMS1
UBE2W	SMAD7	RBPJ
UBE3A	SNAI2	RFX7
UBTD2	SNRK	RICTOR
UGCG	SOCS5	RIMKLB
UHMK1	SPIN1	RIOK1
VAT1	STAMBP	RNF38
VAV2	STX2	RNF138
VMA21	STX12	RPS6KA3
WEE1	TCF4	RQCD1
YWHAB	TCF7L2	RSBN1
YWHAZ	TEAD1	RTF1
ZC3HAV1L	TGS1	RUNX1
ZFR	TM9SF3	RYBP
ZWINT	TMED10	SEH1L
	TMEM106B	SFRS1
	TMEM167A	SFRS5
	TMEM170A	SGOL1
	TMEM41B	SIAH1
	TMEM55B	SIRT1
	TOP2A	SLC16A1
	TSC22D2	SLC25A32
	TULP4	SLC30A7
	UBE2C	SLMO2
	UBE2V2	SMNDC1
	UBE2W	SNRNP48
	UBE3A	SP3
	UBTD2	SPIN1
	UGCG	SRD5A1
	VAMP2	SRRM1
	VAV2	STARD4
	VEZF1	STARD7
	VKORC1L1	STK38L
	WEE1	STRN3
	XIAP	STYX
	ZBTB34	SUMO2
	ZC3H15	SYNCRIP
	ZC3HAV1L	TAF3
	ZCCHC24	TCEA1
	ZFAND3	TCF7L2
	ZFAND5	TGIF2
		THAP5
		TM9SF3
		TMED7
		TMED10
		TMEM188
		TMEM106B
		TMEM167A
		TMEM170A
		TMEM41B
		TMOD3
		TMX1
		TOP1
		TROVE2
		TRUB1
		TUBGCP3
		TULP4
		UBE2C
		UBE2W
		UBE3A
		UBTD2
		UGCG
		VAV2
		VAV3
		VGLL4
		WDR36
		WEE1
		WTAP
		YTHDF1
		YWHAG
		YY1
		ZC3HAV1L
		ZNF217
		ZNF292
		ZNF714
