# Supplementary material for: Systematic Analysis of Cis-Elements in Unstable mRNAs Demonstrates that CUGBP1 Is a Key Regulator of mRNA Decay in Muscle Cells
Source: PLoS One. 2010 Jun 21;5(6):e11201. doi: 10.1371/journal.pone.0011201 (PMC2888570; doi:10.1371/journal.pone.0011201)
Supplement: Table S5 — Primers used in qRT-PCR and RT-PCR analysis. (0.02 MB XLS) [file pone.0011201.s010.xls]

## Sheet: Sheet1
Gene_id	Gene_sym	Left Primer	Right Primer
11461	Actb	AGAGGGAAATCGTGCGTGAC	CAATAGTGATGACCTGGCCGT
68724	Arl8a	CAGTACTCGGGCAAGACCAC	CCTTTGGTGATTTTTCGCAT
12053	Bcl6	AGTTTCTAGGAAAGGCCGGA	GATACAGCTGTCAGCCGGG
11767	Jun	AAAACCTTGAAAGCGCAAAA	GTTTGCAACTGCTGCGTTAG
17869	Myc	CTGTCCATTCAAGCAGACGA	TCCAGCTCCTCCTCGAGTTA
14433	Gapdh	TCACCACCATGGAGAAGGC	GCTAAGCAGTTGGTGGTGCA
66094	Lsm7	CATCGATAAGACCATTCGGG	AGCACCAGGTTGAGCAGTG
228869	Ncoa5	GGCAGCGGAAAGAAGAAATA	TCTCCTTGGACTTCCTCGAA
56349	Net1	TGTTCCCATTCTAGCACCAAG	CAGCTCTGCGTCGAGTTTTT
20620	Plk2	GGCAAGAAGGACAAAGCAAG	TTGCTAGGCTGCTGGGTTAT
108954	Ppp1r15b	GTGAGGCTCTTGCTGGAGAA	TCCTTTGCGATCCTCATCAC
74194	Rnd3	CACTGCCAGTTTTGAAATCG	GGTAAGAGAGTGGACGGACG
17131	Smad7	GAACGAATTATCTGGCCCCT	GACACAGTAGAGCCTCCCCA
20682	Sox9	AGGAAGCTGGCAGACCAGTA	TCCACGAAGGGTCTCTTCTC
213742	Xist	CCAGGAACCATTCTTGCCTA	GGAAAGCCCCAAGTAAAAGG
17927	Myod	TGGATATGGAGCTTCTATCGC	GGTGAGTCGAAACACGGATCAT
12399	Runx3	ACTTCCTCTGCTCCGTGCT	GGTCACCACCGTTCCATC
